# Supplementary material
Source: publisher figshare collection journal article supplement (https://gsapubs.figshare.com/articles/dataset/_/24579001)
Supplement: Supplementary file 1 [file 1]

## Sheet: adakite_230803
Year	CITATION	SAMPLE NAME	LOCATION	Group	LATITUDE (MIN.)	LONGITUDE (MIN.)	GEOLOGICAL AGE	AGE	SIO2(WT%)	TIO2(WT%)	AL2O3(WT%)	FE2O3T(WT%)	FEOT(WT%)	FEO(WT%)	CAO(WT%)	MGO(WT%)	Mg#	K2O(WT%)	NA2O(WT%)	P2O5(WT%)	Sr	Y(PPM)	Sr/Y	ZR(PPM)	La/Yb	LA(PPM)	CE(PPM)	PR(PPM)	ND(PPM)	SM(PPM)	EU(PPM)	GD(PPM)	TB(PPM)	DY(PPM)	HO(PPM)	ER(PPM)	TM(PPM)	YB(PPM)	LU(PPM)	l0	l1	l2	l3	l4	No.REE	s(ln[REE])=0.05	Zr	Al	Si
1978	[2212] KAY R. W. (1978)	samp. ADK-53	ALEUTIAN ARC / CENTRAL ALEUTIAN ARC / ADAK / MOUNT MOFFETT	Aleutian Arc	51.92	-176.75	MIOCENE	CENOZOIC	55.5	0.86	15.5		1.98	1.98	9.51	5.58	0.738095	1.47	3.22	0.32	1783			54	30.38	28.8	64.2		33	5.7	1.82			2.4		1.07		0.948	0.138	2.97	19.13	-3	-1066	4938	8	0.398934	54	0.304041	0.923615
1993	[7987] KAY S. M. (1993)	samp. RB8	ANDEAN ARC / SOUTHERN ANDEAN VOLCANIC ZONE / ARGENTINA / CERRO PAMPA	Andean Arc	-47.9	-71.3	MIOCENE	CENOZOIC	63.22	0.84	16.53		3.78	3.78	6.72	2.92	0.435821	1.88	4.31		2294				33.42	40.1	97		51.5	7.55	1.93		0.63					1.2	0.155	3.26	20.38	-7.8	-1186	-1866	7	1.60189	0	0.324245	1.05209
1993	[7987] KAY S. M. (1993)	samp. RB7	ANDEAN ARC / SOUTHERN ANDEAN VOLCANIC ZONE / ARGENTINA / CERRO PAMPA	Andean Arc	-47.9	-71.3	MIOCENE	CENOZOIC	67.88	0.51	16.26		2.35	2.35	4.5	2.48	0.513458	1.7	4.56		1334				29.91	20.7	44.9		19.9	3.17	0.77		0.27					0.692	0.079	2.51	19.34	20.7	-885	-4505	7	4.84618	0	0.318949	1.12964
1993	[7987] KAY S. M. (1993)	samp. RB5	ANDEAN ARC / SOUTHERN ANDEAN VOLCANIC ZONE / ARGENTINA / CERRO PAMPA	Andean Arc	-47.9	-71.3	MIOCENE	CENOZOIC	62.55	0.62	17.27		3.13	3.13	7.12	3.62	0.536296	1.22	4.66		1886				36.84	26.6	60.9		30.3	4.41	1.16		0.34					0.722	0.094	2.72	20.98	7.6	-1284	-272	7	2.31366	0	0.33876	1.04094
1996	[3941] SAJONA F. G. (1996)	samp. PH93-30	LUZON ARC / LUZON ARC / MINDANAO	Luzon Arc	7	122	PLIOCENE	CENOZOIC	58.8	0.92	17.2	5.81	5.22901		7	2.61	0.33295	1.68	4.48	0.44	1400	11.4	122.81	93	23.41	19.9	44		26		1.2			2.1		1		0.85		2.79	17.34	-8.2	-1094	7244	6	1.97106	93	0.337387	0.978532
1996	[5372] STERN C. R. (1996)	samp. MB-1	ANDEAN ARC / AUSTRAL VOLCANIC ZONE / CHILE / MOUNT BURNEY	Andean Arc	-52.33	-73.47	HOLOCENE	QUATERNARY	64.1	0.46	18.14		4.36		5.62	2.2	0.335366	0.79	4.33	0.03	615	10	61.5	145	9.73	10.7	22		9.4	2.1	0.8							1.1	0.15	2.52	10.37	32.8	156	-4592	6	0.216184	145	0.355826	1.06673
1996	[5372] STERN C. R. (1996)	samp. MB-7	ANDEAN ARC / AUSTRAL VOLCANIC ZONE / CHILE / MOUNT BURNEY	Andean Arc	-52.33	-73.47	HOLOCENE	QUATERNARY	64.17	0.43	17.9		4.03		5.79	2.26	0.3593	0.95	4.48	0.21	626	4	156.5	86	10.24	12.6	28.1		12.3	2.6	0.9							1.23	0.18	2.66	11.38	36.5	-291	-3172	6	0.378409	86	0.351118	1.0679
1996	[5372] STERN C. R. (1996)	samp. MB-9	ANDEAN ARC / AUSTRAL VOLCANIC ZONE / CHILE / MOUNT BURNEY	Andean Arc	-52.33	-73.47	HOLOCENE	QUATERNARY	64.53	0.42	17.33		3.85		5.5	2.18	0.361526	1.08	4.21	0.2	594	6	99	83	14.14	14	28.3		12.6	2.5	0.9							0.99	0.2	2.44	13.97	74.1	-1356	12881	6	0.620129	83	0.339937	1.07389
1996	[5372] STERN C. R. (1996)	samp. MB-14	ANDEAN ARC / AUSTRAL VOLCANIC ZONE / CHILE / MOUNT BURNEY	Andean Arc	-52.33	-73.47	HOLOCENE	QUATERNARY	63.07	0.49	17.69		4.5		5.81	2.8	0.383562	0.87	4.6	0.2	624	6	104	74	7.65	10.4	24.4		11.6	2.4	1							1.36	0.16	2.72	9.39	12.7	304	-13831	6	0.0989806	74	0.346999	1.04959
1996	[5372] STERN C. R. (1996)	samp. MB-21P	ANDEAN ARC / AUSTRAL VOLCANIC ZONE / CHILE / MOUNT BURNEY	Andean Arc	-52.33	-73.47	HOLOCENE	QUATERNARY	69.49	0.34	18.25		3.45		5.39	2.15	0.383929	0.93	4.71	0.21	563	6	93.83	83	11.8	10.5	22.8		10.1	2.1	0.8							0.89	0.18	2.28	13.04	71.8	-1355	11323	6	1.51236	83	0.357984	1.15643
1996	[10965] PROUTEAU G. (1996)	samp. BLA1	LUZON ARC / LUZON ARC / BORNEO / MASUPA RIA VOLCANIC CENTER	Luzon Arc	0	111.5	MIOCENE	CENOZOIC	67.3	0.3	16.2				4.06	1.49		1.41	4.22	0.12	800	4.5	177.78		37.27	12.3	23		9		0.48			0.8		0.4		0.33		1.85	18.9	37.4	-518	-668	6	0.62611	0	0.317772	1.11999
1996	[10965] PROUTEAU G. (1996)	samp. BL3	LUZON ARC / LUZON ARC / BORNEO / MASUPA RIA VOLCANIC CENTER	Luzon Arc	0	111.5	MIOCENE	CENOZOIC	68.8	0.31	15.6				4.02	1.65		1.43	4	0.13	810	4.4	184.09		50.34	14.6	21		11		0.46			0.9		0.35		0.29		1.94	19.95	-9.3	-512	22773	6	1.3194	0	0.306002	1.14495
1996	[10965] PROUTEAU G. (1996)	samp. BR1	LUZON ARC / LUZON ARC / BORNEO / MASUPA RIA VOLCANIC CENTER	Luzon Arc	0	111.5	MIOCENE	CENOZOIC	68	0.31	15.7				3.9	1.59		1.42	4.2	0.13	835	4	208.75		53.1	15.4	28.5		8		0.55			0.8		0.4		0.29		1.81	20.39	55.5	65	-13157	6	4.48e-05	0	0.307964	1.13164
1996	[10965] PROUTEAU G. (1996)	samp. BG1	LUZON ARC / LUZON ARC / BORNEO / MASUPA RIA VOLCANIC CENTER	Luzon Arc	0	111.5	MIOCENE	CENOZOIC	64.5	0.38	16.6				4.5	1.9		1.27	4.55	0.16	1110	3.8	292.11		57.41	15.5	29		12.5		0.6			0.8		0.3		0.27		1.92	22.05	7.1	-933	11804	6	0.0717474	0	0.325618	1.07339
1997	[4096] SAJONA F. G. (1997)	samp. P90-20	LUZON ARC / LUZON ARC / MINDANAO	Luzon Arc	7.8	123	PLIOCENE	CENOZOIC	64.5	0.38	17.95	4.1	3.69		5.18	1.57	0.298479	1.24	4.13	0.14	464	10	46.4	58	7.59	6.45	15		8.5		0.5			1.5		1		0.85		2.23	9.97	25.3	-481	-6133	6	3.19647	58	0.352099	1.07339
1997	[4096] SAJONA F. G. (1997)	samp. PH92-15	LUZON ARC / LUZON ARC / MINDANAO	Luzon Arc	7.08	125.63	PLIOCENE	CENOZOIC	61.5	0.44	16.95	4.35	3.915		5.15	1.95	0.332481	2.72	4.75	0.2	925	11.2	82.59	23	12.07	11.1	22		11.5		0.8			1.8		1		0.92		2.46	12.25	25.9	-455	3618	6	0.810824	23	0.332483	1.02346
1997	[4096] SAJONA F. G. (1997)	samp. PH92-105	LUZON ARC / LUZON ARC / MINDANAO	Luzon Arc	5.6	124	PLIOCENE	CENOZOIC	63.25	0.51	17.15	4.63	4.167		5	2.19	0.344502	1.36	4.7	0.19	687	8.1	84.81	66	9.29	6.5	17		8.5		0.65			1.4		0.7		0.7		2.14	11.91	17.4	-690	-3112	6	0.860791	66	0.336406	1.05259
1997	[4096] SAJONA F. G. (1997)	samp. KL143C	LUZON ARC / LUZON ARC / MINDANAO	Luzon Arc	7	124	PLIOCENE	CENOZOIC	64.75	0.39	16.8	3.93	3.537		4.6	2.24	0.387744	1.71	4.28	0.17	565	10.3	54.85	50	10.84	10.3	22		10		0.65			1.7		1.1		0.95		2.4	11.62	47.1	-291	-8178	6	1.37808	50	0.329541	1.07755
2000	[3520] SAJONA F. G. (2000)	samp. B42	LUZON ARC / LUZON ARC / BATAN / IRAYA	Luzon Arc	20.25	121.9	PLEISTOCENE	QUATERNARY	59	0.78	16.4	5.99	5.39101		6.7	3.51	0.394337	2.7	3.75	0.35	1225	13.8	88.77	120	25.91	28.5	59		31		1.28	3.8		2.4		1.2		1.1		3	17.7	17.3	-1130	7444	7	1.15545	120	0.321695	0.981861
2001	[11115] AGUILLON-ROBLES A. (2001)	samp. 99-120	MEXICAN VOLCANIC BELTS / BAJA CALIFORNIA / SOUTHERN BAJA CALIFORNIA / SANTA CLARA VOLCANIC FIELD	Mexcan Volcanic Belt	27.5	-113.5	MIOCENE	CENOZOIC	67	0.43	17	2.5	2.25		3.7	1.1	0.328358	1.05	5.78	0.16	740	6.3	117.46		22.67	10.2	19.5		11.6	2.3	0.71	2.3		1.15		0.5		0.45		2.13	16.32	-19	-683	17221	8	4.01075	0	0.333464	1.11499
2001	[11115] AGUILLON-ROBLES A. (2001)	samp. 99-113	MEXICAN VOLCANIC BELTS / BAJA CALIFORNIA / SOUTHERN BAJA CALIFORNIA / SANTA CLARA VOLCANIC FIELD	Mexcan Volcanic Belt	27.5	-113.5	MIOCENE	CENOZOIC	65.35	0.53	16.45	3.39	3.051		3.55	1.92	0.38624	1.39	5.6	0.16	620	8	77.5		23.15	12.5	23		11.3	2.45	0.77	2.25		1.45				0.54		2.26	15.86	-5	-294	11921	7	0.813511	0	0.322676	1.08754
2001	[11115] AGUILLON-ROBLES A. (2001)	samp. 99-119	MEXICAN VOLCANIC BELTS / BAJA CALIFORNIA / SOUTHERN BAJA CALIFORNIA / SANTA CLARA VOLCANIC FIELD	Mexcan Volcanic Belt	27.5	-113.5	MIOCENE	CENOZOIC	67.7	0.42	15.8	2.42	2.178		3.57	1.6	0.423504	1.52	5.15	0.14	820	6.8	120.59		25	12	23		13.2	2.75	0.77	2.4		1.3		0.55		0.48		2.24	16.89	-19.9	-685	16247	8	1.29091	0	0.309925	1.12664
2001	[11115] AGUILLON-ROBLES A. (2001)	samp. 99-122	MEXICAN VOLCANIC BELTS / BAJA CALIFORNIA / SOUTHERN BAJA CALIFORNIA / SANTA CLARA VOLCANIC FIELD	Mexcan Volcanic Belt	27.5	-113.5	MIOCENE	CENOZOIC	69	0.31	15.65	1.95	1.755		3.15	1.53	0.465753	0.92	5.58	0.1	705	4.3	163.95		32	8	18.5		10.6	2.5	0.66	1.95		0.95				0.25		1.87	19.08	-68.5	-700	16271	7	1.96509	0	0.306983	1.14828
2001	[11115] AGUILLON-ROBLES A. (2001)	samp. 99-110	MEXICAN VOLCANIC BELTS / BAJA CALIFORNIA / SOUTHERN BAJA CALIFORNIA / SANTA CLARA VOLCANIC FIELD	Mexcan Volcanic Belt	27.5	-113.5	MIOCENE	CENOZOIC	65	0.62	15.9	3.8	3.42		4.2	3.05	0.471406	1.27	5.12	0.16	625	10.1	61.88		14.46	12	21		11.5	2.5	0.78	2.5		1.85				0.83		2.44	12.85	11.5	-270	11623	7	0.795638	0	0.311887	1.08171
2001	[4687] BEATE B.(2001) [GeoReM [298] ]	samp. QC-142	ANDEAN ARC / NORTHERN ANDEAN VOLCANIC ZONE / ECUADOR / QUIMSACOCHA	Andean Arc	-3.033	-79.23	Miocene–Pliocene	CENOZOIC	63.25	0.67	17.7				4.8	1.49		1.38	4.55	0.19	630	13.6	46.32	115	20.26	15.8	31.5		17	3.3	0.99	2.9		1.65		0.95		0.78		2.58	15.62	7	-755	8809	8	4.07	115	0.347195	1.05259
2001	[4687] BEATE B.(2001) [GeoReM [298] ]	samp. QC-141	ANDEAN ARC / NORTHERN ANDEAN VOLCANIC ZONE / ECUADOR / QUIMSACOCHA	Andean Arc	-3.033	-79.23	Miocene–Pliocene	CENOZOIC	63	0.67	17.55				5.2	1.66		1.4	4.8	0.2	685	12.2	56.15	115	21.43	16.5	33		20	3.7	1.05	3.1		1.8		0.95		0.77		2.63	16.17	-5.6	-844	9025	8	3.16118	115	0.344253	1.04843
2001	[4687] BEATE B.(2001) [GeoReM [298] ]	samp. QC-212	ANDEAN ARC / NORTHERN ANDEAN VOLCANIC ZONE / ECUADOR / QUIMSACOCHA	Andean Arc	-3.033	-79.23	Miocene–Pliocene	CENOZOIC	61.4	0.8	17.65				5.9	1.83		1.22	4.65	0.22	720	10.5	68.57	100	19.86	14.5	29		17	3.65	1.04	2.9		1.85		0.85		0.73		2.56	15.64	-12.6	-724	11902	8	0.502515	100	0.346214	1.0218
2001	[4687] BEATE B.(2001) [GeoReM [298] ]	samp. QC-246	ANDEAN ARC / NORTHERN ANDEAN VOLCANIC ZONE / ECUADOR / QUIMSACOCHA	Andean Arc	-3.033	-79.23	Miocene–Pliocene	CENOZOIC	62	0.76	17.8				5	1.28		1.28	4.33	0.2	627	8.4	74.64	110	19.85	13.3	28.5		15.3	3.35	0.94	2.75		1.6		0.7		0.67		2.45	16.01	-8.6	-883	14460	8	0.814307	110	0.349157	1.03179
2001	[4687] BEATE B.(2001) [GeoReM [298] ]	samp. QC-146	ANDEAN ARC / NORTHERN ANDEAN VOLCANIC ZONE / ECUADOR / QUIMSACOCHA	Andean Arc	-3.033	-79.23	Miocene–Pliocene	CENOZOIC	60.3	0.84	17.9				6.3	2.54		1.24	4.7	0.22	825	11	75	100	19.19	16.5	35.5		21	4.05	1.1	3.4		2.15		1		0.86		2.72	15.79	-12.4	-803	8185	8	0.753832	100	0.351118	1.00349
2001	[4687] BEATE B.(2001) [GeoReM [298] ]	samp. QC-205	ANDEAN ARC / NORTHERN ANDEAN VOLCANIC ZONE / ECUADOR / QUIMSACOCHA	Andean Arc	-3.033	-79.23	Miocene–Pliocene	CENOZOIC	62	0.76	17.75				5.6	1.92		1.16	4.6	0.19	700	8.8	79.55	98	18.31	13	26		14.5	3.05	0.88	2.7		1.65		0.75		0.71		2.45	15.16	-2.9	-732	13514	8	0.767517	98	0.348176	1.03179
2001	[4687] BEATE B.(2001) [GeoReM [298] ]	samp. QC-145	ANDEAN ARC / NORTHERN ANDEAN VOLCANIC ZONE / ECUADOR / QUIMSACOCHA	Andean Arc	-3.033	-79.23	Miocene–Pliocene	CENOZOIC	60.5	0.83	17.75				6.1	2.49		1.3	4.62	0.22	800	9.5	84.21	105	18.18	14	31		17.5	3.5	1.02	3		1.85		0.85		0.77		2.57	15.58	-9.7	-838	9440	8	0.717383	105	0.348176	1.00682
2001	[4687] BEATE B.(2001) [GeoReM [298] ]	samp. QC-143	ANDEAN ARC / NORTHERN ANDEAN VOLCANIC ZONE / ECUADOR / QUIMSACOCHA	Andean Arc	-3.033	-79.23	Miocene–Pliocene	CENOZOIC	58.8	0.95	18.35				6.8	2.73		1.06	4.62	0.23	785	9.1	86.26	88	23.65	17.5	26.5		16	3.15	0.99	2.7		1.8		0.85		0.74		2.53	15.52	8.4	-449	15203	8	2.35558	88	0.359945	0.978532
2001	[4687] BEATE B.(2001) [GeoReM [298] ]	samp. QC-154	ANDEAN ARC / NORTHERN ANDEAN VOLCANIC ZONE / ECUADOR / QUIMSACOCHA	Andean Arc	-3.033	-79.23	Miocene–Pliocene	CENOZOIC	60.7	0.83	17.8				6.2	2		1.32	4.9	0.24	885	9	98.33	104	22.22	16	33		20	3.9	1.07	2.9		1.8		0.85		0.72		2.6	16.64	-10.8	-945	10164	8	1.08341	104	0.349157	1.01015
2001	[4687] BEATE B.(2001) [GeoReM [298] ]	samp. QC-140	ANDEAN ARC / NORTHERN ANDEAN VOLCANIC ZONE / ECUADOR / QUIMSACOCHA	Andean Arc	-3.033	-79.23	Miocene–Pliocene	CENOZOIC	71	0.25	15.55				3.04	0.45		2.03	4.8	0.09	545	5.2	104.81	58	33.75	13.5	26.5		12.5	2.3	0.61	1.7		1		0.45		0.4		2.1	18.87	8.7	-875	10432	8	0.43302	58	0.305022	1.18156
2001	[4687] BEATE B.(2001) [GeoReM [298] ]	samp. QC-100	ANDEAN ARC / NORTHERN ANDEAN VOLCANIC ZONE / ECUADOR / QUIMSACOCHA	Andean Arc	-3.033	-79.23	Miocene–Pliocene	CENOZOIC	71	0.27	15.85				2.84	0.18		1.95	4.83	0.09	535	4.9	109.18	70	35.53	13.5	26.5		12	2	0.6	1.7		0.9		0.4		0.38		2.04	19.24	15.6	-904	11272	8	2.33444	70	0.310906	1.18156
2001	[4687] BEATE B.(2001) [GeoReM [298] ]	samp. QC-153	ANDEAN ARC / NORTHERN ANDEAN VOLCANIC ZONE / ECUADOR / QUIMSACOCHA	Andean Arc	-3.033	-79.23	Miocene–Pliocene	CENOZOIC	62.4	0.74	17.45				5.45	1.62		1.47	4.78	0.21	830	7.2	115.28	110	30.36	17	34.5		18.5	3.6	1.02	2.65		1.45		0.7		0.56		2.47	18.34	-10	-905	10996	8	1.90388	110	0.342291	1.03844
2001	[4687] BEATE B.(2001) [GeoReM [298] ]	samp. QC-109	ANDEAN ARC / NORTHERN ANDEAN VOLCANIC ZONE / ECUADOR / QUIMSACOCHA	Andean Arc	-3.033	-79.23	Miocene–Pliocene	CENOZOIC	71.7	0.26	15.6				3.06	0.33		1.98	4.87	0.09	545	4.7	115.96	72	37.84	14	28		13	2.3	0.62	1.85		0.95		0.4		0.37		2.08	19.73	3	-931	13091	8	1.73495	72	0.306002	1.19321
2002	[11116] BENOIT M. (2002)	samp. BC00-30	MEXICAN VOLCANIC BELTS / BAJA CALIFORNIA / SOUTHERN BAJA CALIFORNIA	Mexcan Volcanic Belt	25.5	-111.67	MIOCENE	CENOZOIC	60.2	0.86	15.55	6.56	5.90401		5.66	3.74	0.387806	1.03	4.7	0.17	643	11.4	56.4	112	11.93	10.5	22		12.6	2.95	0.97	3.2		2.15		1		0.88		2.54	12.3	-17.7	-262	9974	8	1.66097	112	0.305022	1.00183
2002	[11116] BENOIT M. (2002)	samp. BC00-28	MEXICAN VOLCANIC BELTS / BAJA CALIFORNIA / SOUTHERN BAJA CALIFORNIA	Mexcan Volcanic Belt	25.5	-111.67	MIOCENE	CENOZOIC	60.1	0.9	15.7	6.72	6.04801		5.9	3.84	0.388349	1.04	4.8	0.18	645	11.8	54.66	115	11.49	10.8	22		12.8	3.1	1.04	3.15		2.15		1.1		0.94		2.57	11.94	-11.6	-312	10061	8	1.25283	115	0.307964	1.00017
2003	[11924] CHUNG SUN-LIN (2003)	samp. ET026D	CENTRAL ASIAN FOLDBELT - CENOZOIC/QUATERNARY / CHINA - CENOZOIC/QUATERNARY / TIBET / NANMU	Central Asian	29.48	90.87	NEOGENE	CENOZOIC	63.62	0.55	16.32	2.75	2.475		3.4	1.04	0.295875	2.71	4.61	0.21	1051	5.6	187.68	85	56.84	21.6	46.7	5.64	22.4	3.67	1.06	2.59	0.27	1.13	0.19	0.52	0.06	0.38	0.052	2.36	22.85	-22.7	-1041	8299	13	2.25116	85	0.320126	1.05875
2003	[11924] CHUNG SUN-LIN (2003)	samp. ET026C	CENTRAL ASIAN FOLDBELT - CENOZOIC/QUATERNARY / CHINA - CENOZOIC/QUATERNARY / TIBET / NANMU	Central Asian	29.48	90.87	NEOGENE	CENOZOIC	65.41	0.51	16.25	3.19	2.871		3.47	1.29	0.310021	2.78	4.25	0.17	902	6.4	140.94	108	48.41	21.3	43.8	5.08	19.9	3.35	0.95	2.53	0.28	1.24	0.2	0.54	0.066	0.44	0.063	2.38	21.56	-8.1	-922	10233	13	1.30325	108	0.318752	1.08853
2003	[11924] CHUNG SUN-LIN (2003)	samp. ET023	CENTRAL ASIAN FOLDBELT - CENOZOIC/QUATERNARY / CHINA - CENOZOIC/QUATERNARY / TIBET	Central Asian	29.61	91.6	NEOGENE	CENOZOIC	65.27	0.53	16.81	3.52	3.168		3.53	1.53	0.32567	2.95	4.19	0.19	1048	8.2	127.8	89	33.69	21.9	45.9	5.51	22.5	3.96	0.99	2.81	0.31	1.56	0.27	0.72	0.097	0.65	0.094	2.58	19.59	4.8	-1059	8126	13	1.03869	89	0.329737	1.0862
2003	[11924] CHUNG SUN-LIN (2003)	samp. ET025E	CENTRAL ASIAN FOLDBELT - CENOZOIC/QUATERNARY / CHINA - CENOZOIC/QUATERNARY / TIBET	Central Asian	29.69	91.75	NEOGENE	CENOZOIC	66.76	0.33	15.16	2.07	1.863		2.7	0.93	0.332975	3.43	3.63	0.14	689	6.9	99.86	102	46.04	24.4	47.7	5.3	19.8	3.22	0.87	2.43	0.27	1.25	0.21	0.6	0.081	0.53	0.082	2.45	20.94	22.7	-1006	9387	13	1.29029	102	0.297372	1.111
2003	[19488] GONZALEZ-PARTIDA E. (2003)	samp. MZ-13	MEXICO-GUERRERO	Guerrero	17.8	-99.6	PALEOCENE	CENOZOIC	64.4	0.7	16.1	3.7	3.33		3.9	1.7	0.337972	3.3	3.9	0.2	753.2	10.9	69.1	192.6	36.33	32.7	66.8	7.8	30.3	5.4	1.4	4	0.5	2.2	0.4	1	0.1	0.9	0.1	2.89	20.54	-11.5	-684	7474	13	4.66857	192.6	0.31581	1.07173
2003	[19488] GONZALEZ-PARTIDA E. (2003)	samp. MZ-16	MEXICO-GUERRERO	Guerrero	17.8	-99.6	PALEOCENE	CENOZOIC	66.4	0.6	15.2	3.9	3.51		3.5	1.8	0.338983	3.2	3.5	0.2	688.6	12	57.38	203.5	32.27	35.5	70.4	8.5	32.7	5.7	1.4	4	0.5	2.6	0.4	1.1	0.2	1.1	0.2	3.06	18.54	31.2	-1166	9922	13	1.78319	203.5	0.298156	1.10501
2003	[19488] GONZALEZ-PARTIDA E. (2003)	samp. MZ-1	MEXICO-GUERRERO	Guerrero	17.8	-99.6	PALEOCENE	CENOZOIC	59.3	1	16.3	6.5	5.85001		4.4	3.1	0.346368	2.8	4.4	0.4	802.1	19.2	41.78	239	29	43.5	90.1	11.4	42.6	7.9	2.1	5.8	0.8	4	0.7	1.9	0.3	1.5	0.2	3.4	17.91	1.9	-588	-635	13	1.76619	239	0.319733	0.986853
2003	[19488] GONZALEZ-PARTIDA E. (2003)	samp. MZ-9	MEXICO-GUERRERO	Guerrero	17.8	-99.6	PALEOCENE	CENOZOIC	63.7	0.8	16.1	4.8	4.32		4.1	2.3	0.347432	3.2	3.7	0.2	783.4	13.7	57.18	196.4	31.18	34.3	69.8	8.6	32.5	5.9	1.6	4.1	0.6	2.8	0.5	1.3	0.2	1.1	0.2	3.11	18	18.3	-906	6705	13	0.978679	196.4	0.31581	1.06008
2003	[19488] GONZALEZ-PARTIDA E. (2003)	samp. MZ-8	MEXICO-GUERRERO	Guerrero	17.8	-99.6	PALEOCENE	CENOZOIC	63.3	0.8	16.2	5.1	4.59		4.3	2.6	0.361613	3	3.9	0.3	865.5	15.3	56.57	229.5	32.15	41.8	82.3	10.3	38.9	6.5	1.8	4.9	0.6	3.3	0.6	1.6	0.2	1.3	0.2	3.24	18.55	17	-795	3118	13	0.843732	229.5	0.317772	1.05342
2003	[19488] GONZALEZ-PARTIDA E. (2003)	samp. MZ-11	MEXICO-GUERRERO	Guerrero	17.8	-99.6	PALEOCENE	CENOZOIC	65.2	0.7	15.6	4.3	3.87		3.7	2.2	0.362438	3.3	3.6	0.2	782.9	13.4	58.43	223.3	34.55	38	78.1	9.2	36.3	6.4	1.8	4.4	0.5	2.8	0.5	1.3	0.2	1.1	0.2	3.14	18.77	23.2	-1056	6439	13	1.59816	223.3	0.306002	1.08504
2003	[11924] CHUNG SUN-LIN (2003)	samp. T065C	CENTRAL ASIAN FOLDBELT - CENOZOIC/QUATERNARY / CHINA - CENOZOIC/QUATERNARY / TIBET	Central Asian	29.74	89.88	NEOGENE	CENOZOIC	57.47	0.66	15.41	4.67	4.203		5.29	2.39	0.362505	2.71	3.6	0.26	1121	9	124.56	123	61.64	37.6	75.8	8.93	35	5.79	1.58	4.36	0.45	1.95	0.31	0.82	0.097	0.61	0.086	2.85	22.89	-20.6	-884	10635	13	1.70445	123	0.302275	0.956399
2003	[19488] GONZALEZ-PARTIDA E. (2003)	samp. MZ-19	MEXICO-GUERRERO	Guerrero	17.8	-99.6	PALEOCENE	CENOZOIC	65	0.7	16	4.1	3.69		3.8	2.1	0.362694	3.3	3.7	0.3	765.1	12.7	60.24	215.5	31.73	34.9	71.9	9	35.3	6.9	1.8	4.4	0.5	3	0.5	1.3	0.2	1.1	0.2	3.13	18.35	13.9	-1083	7637	13	2.21972	215.5	0.313849	1.08171
2003	[19488] GONZALEZ-PARTIDA E. (2003)	samp. MZ-14	MEXICO-GUERRERO	Guerrero	17.8	-99.6	PALEOCENE	CENOZOIC	64.9	0.7	15.7	4.4	3.96		3.8	2.3	0.367412	3.2	3.7	0.3	781.2	13.5	57.87	209.8	31.58	37.9	77.6	9.1	36.2	6.2	1.6	4	0.6	2.7	0.5	1.2	0.2	1.2	0.2	3.14	18.64	25.1	-1054	7219	13	0.91431	209.8	0.307964	1.08005
2003	[19488] GONZALEZ-PARTIDA E. (2003)	samp. MZ-7	MEXICO-GUERRERO	Guerrero	17.8	-99.6	PALEOCENE	CENOZOIC	62.7	0.8	15.9	5.1	4.59		4.4	2.7	0.37037	3	3.9	0.3	827.9	15.4	53.76	209.9	31.08	40.4	82.6	10.1	40.5	7.4	1.9	5.3	0.6	3.4	0.6	1.6	0.2	1.3	0.2	3.26	18.55	6.8	-872	5751	13	1.29839	209.9	0.311887	1.04343
2003	[19488] GONZALEZ-PARTIDA E. (2003)	samp. MZ-5	MEXICO-GUERRERO	Guerrero	17.8	-99.6	PALEOCENE	CENOZOIC	64.6	0.7	15.9	4.3	3.87		4	2.3	0.372771	3.1	4.1	0.2	780	12.6	61.9	196.4	33.64	37	75.8	9	35.2	6.1	1.6	3.9	0.6	2.7	0.5	1.2	0.2	1.1	0.2	3.12	18.61	23.1	-1014	6835	13	1.47669	196.4	0.311887	1.07505
2003	[11924] CHUNG SUN-LIN (2003)	samp. T081	CENTRAL ASIAN FOLDBELT - CENOZOIC/QUATERNARY / CHINA - CENOZOIC/QUATERNARY / TIBET	Central Asian	29.32	88.85	NEOGENE	CENOZOIC	60.57	0.62	16.18	3.97	3.573		3.68	2.25	0.386399	2.01	5.35	0.18	1004	7.1	141.41	101	28.48	13.1	28.4	3.47	14.4	2.79	0.84	2.23	0.29	1.33	0.22	0.59	0.073	0.46	0.063	2.26	18.21	-22.4	-617	7322	13	0.643684	101	0.317379	1.00799
2003	[19488] GONZALEZ-PARTIDA E. (2003)	samp. MZ-12	MEXICO-GUERRERO	Guerrero	17.8	-99.6	PALEOCENE	CENOZOIC	65.4	0.7	15.7	3.7	3.33		4.5	2.1	0.38674	3.1	3.8	0.2	772.8	12.3	62.83	194.4	34.82	38.3	77.1	9.5	36.8	6.3	1.6	4.1	0.5	3	0.5	1.2	0.2	1.1	0.2	3.13	18.86	24.3	-1078	5882	13	1.7328	194.4	0.307964	1.08837
2003	[11924] CHUNG SUN-LIN (2003)	samp. T041D	CENTRAL ASIAN FOLDBELT - CENOZOIC/QUATERNARY / CHINA - CENOZOIC/QUATERNARY / TIBET	Central Asian	29.36	88.81	NEOGENE	CENOZOIC	56.73	0.83	17.17	5.83	5.24701		5.54	3.31	0.386818	1.72	4.11	0.27	911	9.5	95.89	99	24.05	17.8	40.1	5.12	21.8	4.19	1.21	3.46	0.43	2.03	0.35	0.93	0.12	0.74	0.11	2.69	17.28	-20.6	-771	7488	13	0.558489	99	0.336799	0.944084
2003	[14883] GAO YONGFENG (2003)	samp. NTY-05	CENTRAL ASIAN FOLDBELT - CENOZOIC/QUATERNARY / CHINA - CENOZOIC/QUATERNARY / TIBET / NANMU	Central Asian	29.5239	90.8089	MIOCENE	CENOZOIC	66.94	0.45	15.94		1.93	1.93	3.06	1.36	0.413374	3.06	4.39	0.18	903	5.918	152.59	115	36.05	19.18	40.42	4.89	18.58	3.06	0.844	2.032	0.242	1.194	0.226	0.573	0.092	0.532	0.084	2.39	19.72	23.8	-1173	4271	13	1.06065	115	0.312672	1.114
2003	[19488] GONZALEZ-PARTIDA E. (2003)	samp. MZ-17	MEXICO-GUERRERO	Guerrero	17.8	-99.6	PALEOCENE	CENOZOIC	64.6	0.7	15.8	3.6	3.24		4.5	2.3	0.415162	3.3	3.7	0.3	749	12.6	59.44	218	24	28.8	61.6	7.9	33.2	6.1	1.7	4.7	0.6	2.9	0.5	1.2	0.2	1.2	0.2	3.1	17.23	2.9	-1047	10290	13	0.542074	218	0.309925	1.07505
2003	[14883] GAO YONGFENG (2003)	samp. NTY-04	CENTRAL ASIAN FOLDBELT - CENOZOIC/QUATERNARY / CHINA - CENOZOIC/QUATERNARY / TIBET / NANMU	Central Asian	29.5239	90.8089	MIOCENE	CENOZOIC	71.24	0.2	14.66		0.97	0.97	1.68	0.7	0.419162	3.07	4.24	0.07	523	2.869	182.29	63.8	29.19	8.64	17	2.09	7.7	1.27	0.35	0.85		0.527	0.098	0.269	0.046	0.296	0.049	1.61	18.5	48.6	-1310	7027	12	0.910195	63.8	0.287564	1.18556
2003	[14883] GAO YONGFENG (2003)	samp. NT-05	CENTRAL ASIAN FOLDBELT - CENOZOIC/QUATERNARY / CHINA - CENOZOIC/QUATERNARY / TIBET	Central Asian	29.5883	90.0483	MIOCENE	CENOZOIC	71.19	0.37	14.99		0.95	0.95	0.9	0.72	0.431138	4.75	3.62	0.15	538	6.61	81.39	134	34.38	18.98	43.28	5.56	21.02	3.45	0.753	2.188	0.313	1.426	0.25	0.654	0.096	0.552	0.0869	2.49	19.64	5.9	-1138	2419	13	0.544742	134	0.294037	1.18472
2003	[14883] GAO YONGFENG (2003)	samp. NT-12	CENTRAL ASIAN FOLDBELT - CENOZOIC/QUATERNARY / CHINA - CENOZOIC/QUATERNARY / TIBET	Central Asian	29.5883	90.0483	MIOCENE	CENOZOIC	68.18	0.42	15.34		1.57	1.57	2.3	1.19	0.431159	3.48	4.69	0.16	592	5.883	100.63	158	55.51	27.81	54.03	5.65	20.35	3.23	0.811	2.06	0.282	1.356	0.234	0.604	0.088	0.501	0.076	2.48	21.54	28.7	-780	3140	13	0.361146	158	0.300902	1.13463
2003	[19488] GONZALEZ-PARTIDA E. (2003)	samp. MZ-6	MEXICO-GUERRERO	Guerrero	17.8	-99.6	PALEOCENE	CENOZOIC	66.6	0.6	15.7	3.2	2.88		3.3	2.2	0.433071	3.3	4.3	0.2	865.8	10.6	81.68	215.2	44.89	40.4	78.6	9.7	37.2	6.4	1.8	3.9	0.5	2.5	0.4	1.1	0.2	0.9	0.2	3.09	19.76	28.6	-1265	9676	13	4.44554	215.2	0.307964	1.10834
2003	[14883] GAO YONGFENG (2003)	samp. NMY-01	CENTRAL ASIAN FOLDBELT - CENOZOIC/QUATERNARY / CHINA - CENOZOIC/QUATERNARY / TIBET / NANMU	Central Asian	29.5239	90.8089	MIOCENE	CENOZOIC	69.71	0.37	15.33		1.33	1.33	1.91	1.15	0.46371	3.43	4.5	0.14	564	5.004	112.71	150	37.24	17.39	34.4	3.93	14.27	2.45	0.693	1.638	0.21	1.037	0.184	0.475	0.076	0.467	0.077	2.22	19.54	36	-1061	7146	13	0.325751	150	0.300706	1.16009
2003	[14883] GAO YONGFENG (2003)	samp. NT-07	CENTRAL ASIAN FOLDBELT - CENOZOIC/QUATERNARY / CHINA - CENOZOIC/QUATERNARY / TIBET	Central Asian	29.5883	90.0483	MIOCENE	CENOZOIC	67.14	0.42	15.16		1.35	1.35	2.91	1.17	0.464286	3.49	4.13	0.17	640	6.05	105.79	148	55.18	27.7	58.27	6.26	22.51	3.57	0.866	2.25	0.313	1.397	0.233	0.592	0.087	0.502	0.078	2.52	21.94	18.4	-945	4605	13	0.504569	148	0.297372	1.11732
2003	[14883] GAO YONGFENG (2003)	samp. NT-10	CENTRAL ASIAN FOLDBELT - CENOZOIC/QUATERNARY / CHINA - CENOZOIC/QUATERNARY / TIBET	Central Asian	29.5883	90.0483	MIOCENE	CENOZOIC	64.26	0.58	15.19		2.17	2.17	3.38	1.93	0.470732	3.63	3.94	0.23	637	6.838	93.16	164	54.93	29.77	67.47	7.1	25.9	4.09	1.037	2.553	0.335	1.558	0.265	0.656	0.097	0.542	0.085	2.63	22.09	14.3	-1011	3104	13	0.529427	164	0.29796	1.0694
2003	[14883] GAO YONGFENG (2003)	samp. DZL-01	CENTRAL ASIAN FOLDBELT - CENOZOIC/QUATERNARY / CHINA - CENOZOIC/QUATERNARY / TIBET	Central Asian	29.6158	89.9683	MIOCENE	CENOZOIC	72.42	0.3	15.23		0.59	0.59	0.82	0.55	0.482456	4.06	4.3	0.14	348	5.83	59.69	51.1	39.57	18.6	37.7	3.97	16.6	2.51	0.69	1.89	0.21	1.08	0.17	0.51	0.08	0.47	0.08	2.26	19.89	34.8	-1144	8538	13	2.06705	51.1	0.298745	1.20519
2003	[14883] GAO YONGFENG (2003)	samp. NMY-02	CENTRAL ASIAN FOLDBELT - CENOZOIC/QUATERNARY / CHINA - CENOZOIC/QUATERNARY / TIBET / NANMU	Central Asian	29.5239	90.8089	MIOCENE	CENOZOIC	69.24	0.38	15.78		0.83	0.83	0.38	0.81	0.493902	4.37	4.47	0.14	310	3.171	97.76	125	17.28	6.03	13.98	1.46	5.51	1.06	0.287	0.755	0.114	0.57	0.107	0.318	0.051	0.349	0.058	1.55	15.36	55.3	-1059	4572	13	0.962419	125	0.309533	1.15227
2003	[14883] GAO YONGFENG (2003)	samp. JM-7	CENTRAL ASIAN FOLDBELT - CENOZOIC/QUATERNARY / CHINA - CENOZOIC/QUATERNARY / TIBET	Central Asian	29.6939	91.7531	MIOCENE	CENOZOIC	68.52	0.45	14.91		1.25	1.25	1.49	1.22	0.493927	4.24	3.68	0.17	320	4.616	69.32	112	68.83	28.77	50.25		21.93	3.24	0.792	1.878	0.229	1.103	0.186	0.475	0.07	0.418	0.07	2.37	22.99	31.1	-1176	8178	12	0.764191	112	0.292468	1.14029
2003	[14883] GAO YONGFENG (2003)	samp. NT-03	CENTRAL ASIAN FOLDBELT - CENOZOIC/QUATERNARY / CHINA - CENOZOIC/QUATERNARY / TIBET	Central Asian	29.5883	90.0483	MIOCENE	CENOZOIC	67.9	0.49	16.09		1.47	1.47	1.53	1.49	0.503378	3.51	4.61	0.19	686	7.99	85.86	146	27.76	19.93	53.64	6.77	25.59	4.49	1.045	2.913	0.388	1.676	0.319	0.812	0.124	0.718	0.105	2.7	19.17	-4.1	-1281	975	13	1.10245	146	0.315614	1.12997
2003	[14883] GAO YONGFENG (2003)	samp. JMY-07	CENTRAL ASIAN FOLDBELT - CENOZOIC/QUATERNARY / CHINA - CENOZOIC/QUATERNARY / TIBET	Central Asian	29.6939	91.7531	MIOCENE	CENOZOIC	68.14	0.42	14.44		1.23	1.23	1.88	1.41	0.534091	6.55	2.96	0.19	409	5.519	74.11	107	46.7	25.17	51.64	5.77	19.94	2.98	0.761	1.911	0.247	1.166	0.2	0.56	0.091	0.539	0.09	2.44	21.12	47.1	-1254	4327	13	0.732707	107	0.283248	1.13397
2003	[14883] GAO YONGFENG (2003)	samp. NMY-04	CENTRAL ASIAN FOLDBELT - CENOZOIC/QUATERNARY / CHINA - CENOZOIC/QUATERNARY / TIBET / NANMU	Central Asian	29.5239	90.8089	MIOCENE	CENOZOIC	68.75	0.42	15.79		1.15	1.15	1.37	1.34	0.538153	3.82	4.84	0.16	599	4.161	143.96	98.3	44.44	18.4	34.2	4.06	15.23	2.43	0.635	1.487	0.166	0.835	0.156	0.398	0.06	0.414	0.065	2.12	21.07	40	-1325	8633	13	1.11581	98.3	0.309729	1.14412
2003	[14883] GAO YONGFENG (2003)	samp. NMY-07	CENTRAL ASIAN FOLDBELT - CENOZOIC/QUATERNARY / CHINA - CENOZOIC/QUATERNARY / TIBET / NANMU	Central Asian	29.5239	90.8089	MIOCENE	CENOZOIC	70.07	0.36	15.18		0.93	0.93	1.08	1.09	0.539604	4.93	3.95	0.13	501	5.035	99.5	87.9	35.15	15.89	28.49	3.48	12.6	2.08	0.602	1.452	0.181	0.907	0.169	0.461	0.072	0.452	0.07	2.11	19.09	43.1	-1005	5757	13	0.883617	87.9	0.297764	1.16608
2003	[14883] GAO YONGFENG (2003)	samp. NMY-05	CENTRAL ASIAN FOLDBELT - CENOZOIC/QUATERNARY / CHINA - CENOZOIC/QUATERNARY / TIBET / NANMU	Central Asian	29.5239	90.8089	MIOCENE	CENOZOIC	69.58	0.38	15.51		1.08	1.08	0.49	1.27	0.540426	4.11	4.44	0.15	421	3.421	123.06	106	24.88	9.03	16.91	1.98	7.28	1.31	0.345	0.865	0.119	0.649	0.119	0.348	0.056	0.363	0.062	1.71	16.93	60.2	-1068	5733	13	0.683274	106	0.304237	1.15793
2003	[11924] CHUNG SUN-LIN (2003)	samp. ET025B	CENTRAL ASIAN FOLDBELT - CENOZOIC/QUATERNARY / CHINA - CENOZOIC/QUATERNARY / TIBET	Central Asian	29.69	91.75	NEOGENE	CENOZOIC	67.32	0.45	14.43	1.14	1.026		1.85	1.26	0.551181	5.69	3.15	0.05	360	8.3	43.37	129	47.86	26.8	50.8	5.43	19.6	3.09	0.79	2.43	0.27	1.24	0.21	0.6	0.083	0.56	0.086	2.47	21.08	34.1	-972	9575	13	1.5423	129	0.283052	1.12032
2003	[14883] GAO YONGFENG (2003)	samp. JM-21	CENTRAL ASIAN FOLDBELT - CENOZOIC/QUATERNARY / CHINA - CENOZOIC/QUATERNARY / TIBET	Central Asian	29.6939	91.7531	MIOCENE	CENOZOIC	69.51	0.42	15.1		0.9	0.9	0.41	1.17	0.565217	5.73	3.45	0.18	448	4.099	109.29	103	51.93	19.68	45.48	4.69	16.69	2.48	0.566	1.484	0.203	0.945	0.159	0.42	0.065	0.379	0.056	2.18	22.15	29.8	-1140	644	13	0.786657	103	0.296195	1.15676
2003	[14883] GAO YONGFENG (2003)	samp. NT-31	CENTRAL ASIAN FOLDBELT - CENOZOIC/QUATERNARY / CHINA - CENOZOIC/QUATERNARY / TIBET	Central Asian	29.5883	90.0483	MIOCENE	CENOZOIC	70.26	0.39	14.69		0.63	0.63	0.72	0.9	0.588235	6.01	3.12	0.18	388	4.812	80.63	142	63	26.27	46.83	5.48	19.1	2.92	0.662	1.797	0.218	0.988	0.173	0.461	0.068	0.417	0.063	2.3	22.7	33.1	-1101	6811	13	0.851203	142	0.288152	1.16925
2003	[14883] GAO YONGFENG (2003)	samp. JMY-04	CENTRAL ASIAN FOLDBELT - CENOZOIC/QUATERNARY / CHINA - CENOZOIC/QUATERNARY / TIBET	Central Asian	29.6939	91.7531	MIOCENE	CENOZOIC	67.09	0.47	14.62		0.77	0.77	3.65	1.43	0.65	6.68	6.46	0.2	267	6.074	43.96	95.4	54.11	31.06	58.63	6.45	22.41	3.35	0.761	2.097	0.266	1.278	0.233	0.613	0.094	0.574	0.094	2.54	21.67	48.2	-1123	4760	13	0.362907	95.4	0.286779	1.11649
2003	[14883] GAO YONGFENG (2003)	samp. NTY-01	CENTRAL ASIAN FOLDBELT - CENOZOIC/QUATERNARY / CHINA - CENOZOIC/QUATERNARY / TIBET / NANMU	Central Asian	29.5239	90.8089	MIOCENE	CENOZOIC	72.18	0.3	14.94		0.28	0.28	0.34	0.61	0.685393	4.53	4.45	0.05	428	2.927	146.22	84.2	16.19	5.52	11.2	1.35	5.71	1.04	0.29	0.7	0.105	0.531	0.11	0.298	0.051	0.341	0.059	1.5	14.78	53.1	-1187	6251	13	0.983781	84.2	0.293056	1.2012
2006	[11774] MOTOKI A. (2006)	samp. 01228-33	ANDEAN ARC / AUSTRAL VOLCANIC ZONE / CHILE / LAUTARO	Andean Arc	-48.9173	-73.1951	QUATERNARY	QUATERNARY	66.11	0.55	16	3.66	3.294		4.52	1.81	0.354624	2.12	3.76	0.16	534	11	48.55	164	37.25	31.66	61.18	6.17	22.03	3.41	1.04	2.37	0.33	1.77	0.36	0.85	0.14	0.85	0.13	2.73	19.11	58.6	-751	-30	13	0.625437	164	0.313849	1.10018
2006	[11774] MOTOKI A. (2006)	samp. 01228-31	ANDEAN ARC / AUSTRAL VOLCANIC ZONE / CHILE / LAUTARO	Andean Arc	-48.9173	-73.1951	QUATERNARY	QUATERNARY	65.64	0.58	16.05	3.89	3.501		4.82	2	0.36357	2.07	3.73	0.17	537	11	48.82	152	34.04	28.25	56.7	5.05	19.59	3.15	1	2.27	0.3	1.55	0.31	0.85	0.11	0.83	0.11	2.62	19.09	54.8	-673	1687	13	1.88916	152	0.314829	1.09236
2006	[11774] MOTOKI A. (2006)	samp. 01228-32	ANDEAN ARC / AUSTRAL VOLCANIC ZONE / CHILE / LAUTARO	Andean Arc	-48.9173	-73.1951	QUATERNARY	QUATERNARY	68.27	0.57	15.09	3.93	3.537		4.4	2.04	0.365788	2.12	3.7	0.17	518	12	43.17	147	37.75	28.69	56.42	5.36	18.57	2.85	0.99	1.97	0.28	1.34	0.29	0.83	0.11	0.76	0.12	2.58	19.28	71.7	-834	173	13	1.26546	147	0.295998	1.13613
2006	[9146] MACPHERSON C. G. (2006)	samp. 357433	LUZON ARC / LUZON ARC / MINDANAO	Luzon Arc	9.593	125.515	PLEISTOCENE	QUATERNARY	56.71	0.774	17.84				7.26	3.75		1.918	4.61	0.33	860	15.4	55.84	98.7	7.84	12	28.7	3.87	16.3	3.44	1.03	3.11	0.44	2.5	0.52	1.44	0.23	1.53	0.25	2.82	10.72	26.8	-907	2654	13	0.208303	98.7	0.349941	0.943751
2006	[9146] MACPHERSON C. G. (2006)	samp. 357432	LUZON ARC / LUZON ARC / MINDANAO	Luzon Arc	9.593	125.515	PLEISTOCENE	QUATERNARY	58.99	0.653	18.12				6.24	3.13		2.048	4.82	0.257	849	13.9	61.08	114.9	11.01	14.2	26.9	3.82	14.9	3.05	0.91	2.67	0.38	2.11	0.43	1.19	0.19	1.29	0.22	2.7	12.02	41.6	-832	6408	13	0.554254	114.9	0.355434	0.981694
2006	[9146] MACPHERSON C. G. (2006)	samp. 357440	LUZON ARC / LUZON ARC / MINDANAO	Luzon Arc	9.624	125.476	PLEISTOCENE	QUATERNARY	60.37	0.574	18.36				5.14	2.54		2.2	4.79	0.222	875	11.2	78.13	111.9	16.48	15	31	3.56	13.5	2.85	0.89	2.42	0.34	1.84	0.35	0.94	0.15	0.91	0.15	2.57	14.15	33.6	-599	5419	13	0.389411	111.9	0.360141	1.00466
2006	[9146] MACPHERSON C. G. (2006)	samp. 357438	LUZON ARC / LUZON ARC / MINDANAO	Luzon Arc	9.607	125.455	PLEISTOCENE	QUATERNARY	69.85	0.287	16.4				0.64	1.19		4.585	4.7	0.122	569	6.5	87.54	110.3	30.33	9.1	18.1	2.72	11.2	2.09	0.63	1.7	0.21	0.99	0.17	0.4	0.06	0.3	0.04	1.94	18.3	-39.4	-584	4832	13	1.75891	110.3	0.321695	1.16242
2006	[9146] MACPHERSON C. G. (2006)	samp. 357423	LUZON ARC / LUZON ARC / MINDANAO	Luzon Arc	9.8	125.446	PLEISTOCENE	QUATERNARY	62.86	0.53	17.58				3.85	2.15		2.604	5.02	0.206	979	9.6	101.98	120.1	18.57	13	23.9	3.73	15.4	2.81	0.84	2.34	0.3	1.57	0.29	0.74	0.11	0.7	0.1	2.41	15.56	0.5	-808	6102	13	1.65408	120.1	0.344841	1.0461
2006	[9146] MACPHERSON C. G. (2006)	samp. 357444	LUZON ARC / LUZON ARC / MINDANAO	Luzon Arc	9.699	125.434	PLEISTOCENE	QUATERNARY	64.67	0.323	17.3				3.71	2.01		2.871	5.28	0.177	1221	7.8	156.54	120.1	22	9.9	18.4	3.16	10.1	2.18	0.68	1.7	0.22	1.14	0.2	0.52	0.08	0.45	0.06	2.08	16.49	-8	-667	3094	13	3.33526	120.1	0.339349	1.07622
2007	[10660] CASTILLO P. R.(2007) [GeoReM [3059] ]	samp. P90-20	LUZON ARC / LUZON ARC / MINDANAO	Luzon Arc	7	122	MIOCENE	CENOZOIC	64.97	0.38	18.08	4.13	3.717		5.22	1.58	0.298282	1.25	4.16	0.14	464	10	46.4	58	7.73	6.65	14.71		8.15	1.91	0.68		0.28	1.59		0.91		0.86	0.14	2.25	9.83	19.5	-496	3796	9	0.243706	58	0.354649	1.08121
2007	[10660] CASTILLO P. R.(2007) [GeoReM [3059] ]	samp. PH93-18	LUZON ARC / LUZON ARC / MINDANAO	Luzon Arc	7	122	MIOCENE	CENOZOIC	67.48	0.35	17.22	3.35	3.015		4.26	1.65	0.353698	1.14	4.33	0.15	460	9.5	48.42	88	10.86	8.04	16.08		8.06	1.7	0.61		0.24	1.33		0.77		0.74	0.12	2.17	11.57	36.6	-487	3785	9	0.272453	88	0.33778	1.12298
2007	[10364] GUO ZHENGFU(2007) [GeoReM [3066] ]	samp. GUO37	CENTRAL ASIAN FOLDBELT - CENOZOIC/QUATERNARY / CHINA - CENOZOIC/QUATERNARY / TIBET / XIGAZE	Central Asian	29.3	88.8	MIOCENE	CENOZOIC	59.22	0.74	18.13	5.93	5.33701		5.28	2.95	0.355979	1.68	5.85	0.14	1133	10.1	112.18	114	25.49	18.1	36.9	5.01	19.2	3.77	1.23	2.89	0.36	1.78	0.32	0.82	0.12	0.71	0.09	2.59	17.67	-9.6	-686	3775	13	1.32725	114	0.35563	0.985522
2007	[10364] GUO ZHENGFU(2007) [GeoReM [3066] ]	samp. G09	CENTRAL ASIAN FOLDBELT - CENOZOIC/QUATERNARY / CHINA - CENOZOIC/QUATERNARY / TIBET / WUYU	Central Asian	29.4	89.4	MIOCENE	CENOZOIC	67.29	0.63	16.18	2.46	2.214		3.69	1.49	0.402268	3.7	4.28	0.22	785	12.9	60.85	173	28.15	18.3	40.8	5.82	20.7	3.21	1.24	2.9	0.35	1.64	0.28	0.72	0.1	0.65	0.09	2.55	18.78	-4.8	-955	2937	13	1.99468	173	0.317379	1.11982
2007	[10364] GUO ZHENGFU(2007) [GeoReM [3066] ]	samp. GUO62	CENTRAL ASIAN FOLDBELT - CENOZOIC/QUATERNARY / CHINA - CENOZOIC/QUATERNARY / TIBET / GEGAR	Central Asian	31.5	81.8	MIOCENE	CENOZOIC	65.93	0.64	18.11	2.86	2.574		3.74	1.99	0.436021	2.24	4.16	0.27	490	11.2	43.75	135	30	22.8	47.6	6.04	17.2	4.09	1.51	2.64	0.38	1.99	0.33	0.76	0.11	0.76	0.12	2.66	18.37	16.6	-771	8193	13	3.30408	135	0.355237	1.09719
2007	[10364] GUO ZHENGFU(2007) [GeoReM [3066] ]	samp. G006	CENTRAL ASIAN FOLDBELT - CENOZOIC/QUATERNARY / CHINA - CENOZOIC/QUATERNARY / TIBET / NANMU	Central Asian	29.5	90.9	MIOCENE	CENOZOIC	70.02	0.46	16.07	2.02	1.818		1.86	1.41	0.436803	3.31	4.69	0.13	317	4.17	76.02	92.6	26.09	8.61	14.8	1.68	6.22	1.24	0.45	0.81	0.11	0.58	0.12	0.33	0.05	0.33	0.05	1.61	16.9	54.2	-769	5856	13	1.77604	92.6	0.315222	1.16525
2007	[10364] GUO ZHENGFU(2007) [GeoReM [3066] ]	samp. GUO48	CENTRAL ASIAN FOLDBELT - CENOZOIC/QUATERNARY / CHINA - CENOZOIC/QUATERNARY / TIBET	Central Asian	29.83	85.68	MIOCENE	CENOZOIC	62.68	0.85	17.02	3.84	3.456		4.63	2.72	0.440414	2.79	4.98	0.41	1024	8.53	120.05	126	35.67	23.9	53.6	6.67	25.4	5.02	1.48	3.05	0.42	1.89	0.31	0.8	0.11	0.67	0.1	2.72	19.88	-11.2	-1005	7512	13	0.630142	126	0.333856	1.0431
2007	[10364] GUO ZHENGFU(2007) [GeoReM [3066] ]	samp. GUO51	CENTRAL ASIAN FOLDBELT - CENOZOIC/QUATERNARY / CHINA - CENOZOIC/QUATERNARY / TIBET / GEGAR	Central Asian	31.5	81.8	MIOCENE	CENOZOIC	68.15	0.48	16.31	2.95	2.655		2.88	2.24	0.45761	2.83	3.7	0.38	689	8.9	77.42	122	37.12	27.1	45.6	5.83	18.4	3.55	1.68	2.31	0.3	1.54	0.28	0.7	0.11	0.73	0.11	2.59	19.29	41.8	-876	7914	13	1.22764	122	0.319929	1.13413
2007	[10364] GUO ZHENGFU(2007) [GeoReM [3066] ]	samp. G016	CENTRAL ASIAN FOLDBELT - CENOZOIC/QUATERNARY / CHINA - CENOZOIC/QUATERNARY / TIBET	Central Asian	29.8	91.8	MIOCENE	CENOZOIC	68.82	0.23	16.01	1.42	1.278		1.74	1.3	0.504267	6.77	3.57	0.1	422	6.23	67.74	124	64.38	30.9	56.7	6.7	23.4	3.15	0.81	1.88	0.23	1.13	0.21	0.56	0.08	0.48	0.06	2.43	23.19	34.1	-1003	-2274	13	2.04613	124	0.314045	1.14528
2007	[10364] GUO ZHENGFU(2007) [GeoReM [3066] ]	samp. ZF09	CENTRAL ASIAN FOLDBELT - CENOZOIC/QUATERNARY / CHINA - CENOZOIC/QUATERNARY / TIBET / SHIQUANHE	Central Asian	33.5	80.2	MIOCENE	CENOZOIC	66.47	0.91	16.07	2.35	2.115		3.85	2.2	0.509849	3.48	4.21	0.39	819	11	74.45	130	37.05	32.6	55.1	6.84	26.9	5.47	1.89	3.1	0.43	2.32	0.39	0.91	0.13	0.88	0.13	2.86	19.26	13.2	-785	10829	13	1.84525	130	0.315222	1.10617
2007	[9960] PALLARES C. (2007)	samp. BC05-29A	MEXICAN BASIN AND RANGE / WESTERN MEXICAN BASIN AND RANGE (GULF EXTENSIONAL / BAJA CALIFORNIA / JARAGUAY VOLCANIC FIELD	Mexican Basin	29.5191	-114.497	NEOGENE	CENOZOIC	62.8	0.52	16	3.5	3.15		5.17	3.48	0.524887	1.68	4.21	0.16	982	7.4	132.7	124	23.39	13.8	29		15	2.85	0.83	2.4		1.3		0.7		0.59		2.37	16.82	3.6	-890	9233	8	3.31828	124	0.313849	1.0451
2007	[10364] GUO ZHENGFU(2007) [GeoReM [3066] ]	samp. G019	CENTRAL ASIAN FOLDBELT - CENOZOIC/QUATERNARY / CHINA - CENOZOIC/QUATERNARY / TIBET	Central Asian	29.8	91.8	MIOCENE	CENOZOIC	68.56	0.48	15.25	1.72	1.548		2.49	1.77	0.533454	5.37	4.16	0.13	448	5.51	81.31	109	63.86	28.1	49.5	5.74	20.8	3	0.79	1.63	0.22	1.14	0.2	0.49	0.07	0.44	0.06	2.34	22.83	33.3	-960	1360	13	1.43323	109	0.299137	1.14096
2007	[10364] GUO ZHENGFU(2007) [GeoReM [3066] ]	samp. ZFG17	CENTRAL ASIAN FOLDBELT - CENOZOIC/QUATERNARY / CHINA - CENOZOIC/QUATERNARY / TIBET / MAJIANG	Central Asian	29.7	89.9	MIOCENE	CENOZOIC	69.36	0.65	17.08	2.36	2.124		1.71	2.59	0.549427	2.15	3.72	0.26	889	10.1	88.02	167	26.76	18.2	35.6	4.71	19.3	3.64	1.38	3.93	0.36	1.72	0.31	0.78	0.11	0.68	0.11	2.6	17.44	-12.6	-784	14442	13	4.45099	167	0.335033	1.15427
2007	[11974] LI CHAOWEN (2007)	samp. 20YJ-133	CENTRAL ASIAN FOLDBELT - CENOZOIC/QUATERNARY / CHINA - CENOZOIC/QUATERNARY / JILIN PROVINCE	Central Asian	42.46	129	EOCENE	CENOZOIC	61.58	0.73	14.83		1.77	1.77	6.15	3.55	0.667293	2.05	3.51	0.32	1378	8.9	154.83	140	62.35	37.41	84.93	10.7	42.16	6.76	1.71	4.24	0.45	1.88	0.29	0.89	0.09	0.6	0.08	2.88	23.88	-30.2	-1216	7092	13	3.39001	140	0.290898	1.0248
2007	[11974] LI CHAOWEN (2007)	samp. 05YJ-73	CENTRAL ASIAN FOLDBELT - CENOZOIC/QUATERNARY / CHINA - CENOZOIC/QUATERNARY / JILIN PROVINCE	Central Asian	42.46	129	EOCENE	CENOZOIC	62.01	0.77	15.38				6.08	3.48		2.12	3.41	0.3	1682	8.19	205.37	131	69.55	38.95	86.39	11.17	42.76	6.09	1.6	3.69	0.42	1.66	0.28	0.76	0.09	0.56	0.09	2.84	24.24	-12	-1452	7604	13	1.42138	131	0.301687	1.03195
2008	[12247] WANG QIANG(2008) [GeoReM [4035] ]	samp. 9020-3	CENTRAL ASIAN FOLDBELT - CENOZOIC/QUATERNARY / CHINA - CENOZOIC/QUATERNARY / TIBET / DUOGECUOREN ADAKITES	Central Asian	34	88	EOCENE	CENOZOIC	66.824	0.628	15.741	3.744	3.3696		2.725	0.632	0.157937	4.55	3.39	0.166	1153	11.45	100.7	288.8	67.44	67.78	112	12.15	40.17	5.612	1.515	3.288	0.487	2.364	0.425	1.05	0.155	1.005	0.159	3.12	22.52	59.9	-908	3622	13	0.627545	288.8	0.308768	1.11207
2008	[12247] WANG QIANG(2008) [GeoReM [4035] ]	samp. 2388	CENTRAL ASIAN FOLDBELT - CENOZOIC/QUATERNARY / CHINA - CENOZOIC/QUATERNARY / TIBET / DUOGECUOREN ADAKITES	Central Asian	34	88	EOCENE	CENOZOIC	72.9429	0.360126	14.9442	2.12719	1.91447		1.68873	0.488307	0.203226	3.64602	3.35711	0.0539172	586	5.725	102.36	115.1	47.5	28.88	51.48	5.785	19.55	2.925	0.587	1.759	0.266	1.228	0.222	0.578	0.085	0.608	0.102	2.47	20.92	60.8	-1128	6635	13	0.632048	115.1	0.293139	1.21389
2008	[12247] WANG QIANG(2008) [GeoReM [4035] ]	samp. D2390	CENTRAL ASIAN FOLDBELT - CENOZOIC/QUATERNARY / CHINA - CENOZOIC/QUATERNARY / TIBET / DUOGECUOREN ADAKITES	Central Asian	34	88	EOCENE	CENOZOIC	71.15	0.41	15.21	3.01	2.709		1.68	0.77	0.221328	3.77	3.38	0.09	607	7.82	77.62	83.1	47.66	35.6	62.9	7.09	25.5	3.91	0.843	2.41	0.364	1.82	0.319	0.764	0.114	0.747	0.115	2.74	20.7	41.9	-848	4673	13	0.705278	83.1	0.298352	1.18406
2008	[11653] FALLOON T. J. (2008)	samp. 4-14	TONGA ARC / TONGA TRENCH	Tonga Arc	-14.8167	-173.383	QUATERNARY	QUATERNARY	73.23	0.11	14.38		1.79		7.45	0.6	0.251046	0.07	2.3	0.04	550	7	78.57	48	18.4	11.59	19.96	2.21	8.03	1.38	0.32	1.16	0.17	1.03	0.19	0.58	0.08	0.63	0.1	2.03	14.7	77.3	-627	3875	13	0.693039	48	0.282071	1.21867
2008	[12247] WANG QIANG(2008) [GeoReM [4035] ]	samp. 4567	CENTRAL ASIAN FOLDBELT - CENOZOIC/QUATERNARY / CHINA - CENOZOIC/QUATERNARY / TIBET / DUOGECUOREN ADAKITES	Central Asian	34	88	EOCENE	CENOZOIC	72.3048	0.278469	15.3198	1.41739	1.27565		1.88818	0.515869	0.287951	4.05383	3.92962	0.0210354	367.2	3.054	120.24	87.27	69.81	21.71	36.58	3.838	12.49	1.737	0.444	0.996	0.138	0.657	0.111	0.284	0.043	0.311	0.045	1.9	23.4	64.4	-1086	5766	13	0.630992	87.27	0.300506	1.20327
2008	[12247] WANG QIANG(2008) [GeoReM [4035] ]	samp. 3114	CENTRAL ASIAN FOLDBELT - CENOZOIC/QUATERNARY / CHINA - CENOZOIC/QUATERNARY / TIBET / DUOGECUOREN ADAKITES	Central Asian	34	88	EOCENE	CENOZOIC	71.9642	0.320925	15.1625	2.0764	1.86876		1.95289	0.778522	0.294084	3.91792	3.28214	0.0678296	504.1	5.078	99.27	86.85	43.22	23.38	42.3	4.569	15.76	2.348	0.413	1.398	0.211	1.034	0.187	0.498	0.077	0.541	0.091	2.29	20.34	70	-1144	5333	13	0.468008	86.85	0.29742	1.19761
2008	[12247] WANG QIANG(2008) [GeoReM [4035] ]	samp. LQS-12	CENTRAL ASIAN FOLDBELT - CENOZOIC/QUATERNARY / CHINA - CENOZOIC/QUATERNARY / TIBET / DUOGECUOREN ADAKITES	Central Asian	34	88	EOCENE	CENOZOIC	71.0127	0.270833	15.22	2.12021	1.90819		2.27045	0.88861	0.317724	3.75707	3.93203	0.0553528	451.7	5.691	79.37	133.6	61.42	29.91	51.01	5.514	18.99	2.927	0.605	1.887	0.281	1.242	0.213	0.547	0.079	0.487	0.087	2.44	21.63	45	-855	8763	13	0.797589	133.6	0.298549	1.18177
2008	[12247] WANG QIANG(2008) [GeoReM [4035] ]	samp. 04WQT-4	CENTRAL ASIAN FOLDBELT - CENOZOIC/QUATERNARY / CHINA - CENOZOIC/QUATERNARY / TIBET / DUOGECUOREN ADAKITES	Central Asian	34	88	EOCENE	CENOZOIC	68.32	0.470808	15.7	3.32	2.988		3.09	1.42	0.322141	3.28	4.38	0.147997	760	9.325	81.5	214.4	71.04	51.01	88.92	9.689	32.67	4.763	0.881	2.624	0.37	1.703	0.297	0.818	0.118	0.718	0.118	2.85	22.99	52.6	-1077	4661	13	0.835095	214.4	0.307964	1.13696
2008	[11653] FALLOON T. J. (2008)	samp. 113-2-12	TONGA ARC / TONGA TRENCH	Tonga Arc	-14.8167	-173.383	QUATERNARY	QUATERNARY	70.13	0.15	14.03		4.77		4.86	2.27	0.322443	0.3	3.37	0.04	549	6.9	79.57	66	12.5	8	19	2.22	9	1.42	0.42	1.19	0.19	1.09	0.21	0.59	0.1	0.64	0.1	2.05	13.45	52.7	-921	-3705	13	0.500772	66	0.275206	1.16708
2008	[12247] WANG QIANG(2008) [GeoReM [4035] ]	samp. 04WQT-5	CENTRAL ASIAN FOLDBELT - CENOZOIC/QUATERNARY / CHINA - CENOZOIC/QUATERNARY / TIBET / DUOGECUOREN ADAKITES	Central Asian	34	88	EOCENE	CENOZOIC	68.35	0.46	15.75	3.24	2.916		3.05	1.41	0.325936	3.23	4.31	0.150218	792	9.55	82.93	219.6	71.2	52.33	91.61	9.903	33.11	4.995	0.931	2.838	0.37	1.811	0.299	0.79	0.111	0.735	0.114	2.87	23.27	46.6	-1051	6456	13	0.293826	219.6	0.308945	1.13746
2008	[12247] WANG QIANG(2008) [GeoReM [4035] ]	samp. 04WQT-8	CENTRAL ASIAN FOLDBELT - CENOZOIC/QUATERNARY / CHINA - CENOZOIC/QUATERNARY / TIBET / DUOGECUOREN ADAKITES	Central Asian	34	88	EOCENE	CENOZOIC	67.67	0.455435	15.5216	3.25	2.925		3.05	1.41603	0.326196	3.26	4.34	0.146177	772.6	9.265	83.39	212.8	70.92	49.86	87.47	9.713	32.43	4.825	0.955	2.654	0.372	1.772	0.305	0.77	0.119	0.703	0.114	2.85	23.01	47.2	-1046	4706	13	0.725827	212.8	0.304464	1.12614
2008	[12247] WANG QIANG(2008) [GeoReM [4035] ]	samp. 04WQT-2	CENTRAL ASIAN FOLDBELT - CENOZOIC/QUATERNARY / CHINA - CENOZOIC/QUATERNARY / TIBET / DUOGECUOREN ADAKITES	Central Asian	34	88	EOCENE	CENOZOIC	68.07	0.46	15.64	3.25	2.925		3.07	1.42	0.326812	3.26	4.35	0.15	775	9.208	84.17	213.9	72.27	50.66	88.28	9.718	32.69	4.816	0.894	2.812	0.372	1.799	0.306	0.796	0.109	0.701	0.12	2.86	23.05	46.5	-1054	6851	13	0.340434	213.9	0.306787	1.1328
2008	[12247] WANG QIANG(2008) [GeoReM [4035] ]	samp. 04WQT-6	CENTRAL ASIAN FOLDBELT - CENOZOIC/QUATERNARY / CHINA - CENOZOIC/QUATERNARY / TIBET / DUOGECUOREN ADAKITES	Central Asian	34	88	EOCENE	CENOZOIC	68.24	0.462779	15.71	3.29	2.961		3.11	1.43998	0.327195	3.26627	4.37754	0.149956	773.7	9.335	82.88	211.9	70.66	49.53	87.66	9.512	32.13	4.69	0.921	2.778	0.364	1.775	0.297	0.779	0.112	0.701	0.113	2.84	23.05	46.1	-1028	5579	13	0.178877	211.9	0.30816	1.13563
2008	[12084] DANYUSHEVSKY L. V. (2008)	samp. AV57	TONGA ARC / FIJI ISLANDS / KA(N)DAVU ISLAND GROUP	Tonga Arc	-19.145	-178.042	PLEISTOCENE	QUATERNARY	61.21	0.88	17.68		4.51		6.26	2.27	0.334808	1.78	4.88	0.46	1667	20	83.35	178	19.1	30.56	64.03	8.74	35.74	6.2	1.75	4.58	0.59	2.99	0.59	1.65		1.6	0.26	3.21	16.12	25.2	-1188	5203	12	0.916002	178	0.346803	1.01864
2008	[12247] WANG QIANG(2008) [GeoReM [4035] ]	samp. 04WQT-3	CENTRAL ASIAN FOLDBELT - CENOZOIC/QUATERNARY / CHINA - CENOZOIC/QUATERNARY / TIBET / DUOGECUOREN ADAKITES	Central Asian	34	88	EOCENE	CENOZOIC	67.71	0.49	15.65	3.44	3.096		3.19	1.63	0.3449	3.25	4.32	0.156876	816.7	9.573	85.31	223.6	71.98	52.76	93.77	10.22	33.85	5.049	1.014	3.017	0.39	1.865	0.321	0.829	0.119	0.733	0.117	2.9	23.13	43.6	-996	5371	13	0.190227	223.6	0.306983	1.12681
2008	[12247] WANG QIANG(2008) [GeoReM [4035] ]	samp. 04WQT-7	CENTRAL ASIAN FOLDBELT - CENOZOIC/QUATERNARY / CHINA - CENOZOIC/QUATERNARY / TIBET / DUOGECUOREN ADAKITES	Central Asian	34	88	EOCENE	CENOZOIC	67.72	0.491933	15.65	3.45	3.105		3.18	1.65	0.347003	3.21	4.31	0.156704	815.5	9.704	84.04	222.1	77.16	52.7	93.09	10.2	34.16	5.005	0.906	2.608	0.379	1.79	0.305	0.787	0.118	0.683	0.115	2.87	23.4	48	-1072	4211	13	1.1168	222.1	0.306983	1.12698
2008	[12247] WANG QIANG(2008) [GeoReM [4035] ]	samp. 04WQT-1	CENTRAL ASIAN FOLDBELT - CENOZOIC/QUATERNARY / CHINA - CENOZOIC/QUATERNARY / TIBET / DUOGECUOREN ADAKITES	Central Asian	34	88	EOCENE	CENOZOIC	67.6	0.48	15.64	3.36	3.024		3.19	1.64	0.351629	3.25	4.32	0.16	826.7	9.571	86.38	224.2	70.15	51.63	90.98	9.954	33.38	4.893	0.952	2.952	0.386	1.812	0.305	0.837	0.112	0.736	0.113	2.88	23.14	43.4	-998	5527	13	0.339705	224.2	0.306787	1.12498
2008	[12247] WANG QIANG(2008) [GeoReM [4035] ]	samp. 7509-3	CENTRAL ASIAN FOLDBELT - CENOZOIC/QUATERNARY / CHINA - CENOZOIC/QUATERNARY / TIBET / DUOGECUOREN ADAKITES	Central Asian	34	88	EOCENE	CENOZOIC	67.48	0.67	14.74	3.96	3.564		3.43	2.06	0.366287	4.07	3.46	0.19605	524.3	10.86	48.28	274.9	88.49	67.61	112.8	11.91	38.5	5.433	1.015	3.018	0.427	2.099	0.349	0.92	0.122	0.764	0.121	3	24.02	50.6	-868	3484	13	0.644931	274.9	0.289133	1.12298
2008	[12247] WANG QIANG(2008) [GeoReM [4035] ]	samp. 7509-4	CENTRAL ASIAN FOLDBELT - CENOZOIC/QUATERNARY / CHINA - CENOZOIC/QUATERNARY / TIBET / DUOGECUOREN ADAKITES	Central Asian	34	88	EOCENE	CENOZOIC	67.53	0.669216	14.8	4.03	3.627		3.49	2.13	0.369984	4.04	3.47	0.195892	510.9	10.61	48.15	280.3	86.34	67.86	114.7	11.96	38.49	5.391	1.034	3.084	0.436	2.026	0.342	0.894	0.127	0.786	0.118	3	24.07	51.3	-881	3433	13	0.407475	280.3	0.29031	1.12381
2008	[12247] WANG QIANG(2008) [GeoReM [4035] ]	samp. 5132-5	CENTRAL ASIAN FOLDBELT - CENOZOIC/QUATERNARY / CHINA - CENOZOIC/QUATERNARY / TIBET / DUOGECUOREN ADAKITES	Central Asian	34	88	EOCENE	CENOZOIC	66.9412	0.672049	14.6156	3.9976	3.59784		3.44152	2.14005	0.372968	3.94903	3.38502	0.19428	509.3	10.45	48.74	274.2	88.13	66.54	113.8	11.69	38.59	5.405	1.066	3.428	0.444	2.027	0.35	0.896	0.127	0.755	0.123	3.01	23.94	46.2	-868	5669	13	0.2316	274.2	0.286692	1.11402
2008	[12247] WANG QIANG(2008) [GeoReM [4035] ]	samp. 5132-6	CENTRAL ASIAN FOLDBELT - CENOZOIC/QUATERNARY / CHINA - CENOZOIC/QUATERNARY / TIBET / DUOGECUOREN ADAKITES	Central Asian	34	88	EOCENE	CENOZOIC	67.23	0.62	14.93	3.7	3.33		3.42	2.03	0.378731	4.04	3.32	0.18	510.7	10.45	48.87	271.8	90.6	66.41	113.5	11.94	38.36	5.361	0.999	3.139	0.415	2.035	0.339	0.875	0.126	0.733	0.12	2.99	24.12	49.7	-915	3871	13	0.331416	271.8	0.29286	1.11882
2008	[12247] WANG QIANG(2008) [GeoReM [4035] ]	samp. 5132-4	CENTRAL ASIAN FOLDBELT - CENOZOIC/QUATERNARY / CHINA - CENOZOIC/QUATERNARY / TIBET / DUOGECUOREN ADAKITES	Central Asian	34	88	EOCENE	CENOZOIC	63.1322	0.668902	15.2237	4.89	4.401		4.72307	2.7909	0.388062	3.15368	3.74208	0.198782	1108.9	14.8	74.93	200.8	40.15	47.58	86.8	9.761	34.2	5.425	1.123	4.001	0.506	2.798	0.501	1.301	0.209	1.185	0.196	3.15	19.27	47.7	-789	3099	13	0.602029	200.8	0.298622	1.05063
2008	[12084] DANYUSHEVSKY L. V. (2008)	samp. AV90	TONGA ARC / FIJI ISLANDS / KA(N)DAVU ISLAND GROUP	Tonga Arc	-19.117	-178.19	PLEISTOCENE	QUATERNARY	66.87	0.46	16.18		3.16		3.94	2.02	0.389961	2.77	4.3	0.24	779	16	48.69	185	19.01	28.14	56.64	6.82	25.48	4.46	1.1	3.4	0.49	2.6	0.52	1.49		1.48	0.23	3.04	15.55	49.4	-869	1474	12	0.322818	185	0.317379	1.11283
2008	[12247] WANG QIANG(2008) [GeoReM [4035] ]	samp. 5130-4	CENTRAL ASIAN FOLDBELT - CENOZOIC/QUATERNARY / CHINA - CENOZOIC/QUATERNARY / TIBET / DUOGECUOREN ADAKITES	Central Asian	34	88	EOCENE	CENOZOIC	61.9604	0.837961	15.4765	5.41	4.869		4.87685	3.37865	0.40965	3.12	3.65069	0.24424	986.8	13.97	70.64	241.9	60.38	65.27	112.5	12.44	42.84	6.219	1.282	4.08	0.516	2.686	0.475	1.211	0.177	1.081	0.179	3.21	21.79	49.3	-910	4621	13	0.287918	241.9	0.303579	1.03113
2008	[12247] WANG QIANG(2008) [GeoReM [4035] ]	samp. 9020-2	CENTRAL ASIAN FOLDBELT - CENOZOIC/QUATERNARY / CHINA - CENOZOIC/QUATERNARY / TIBET / DUOGECUOREN ADAKITES	Central Asian	34	88	EOCENE	CENOZOIC	64.851	0.604	14.882	4.057	3.6513		3.484	2.541	0.410348	4.654	2.588	0.233	1084.7	14.84	73.09	265.5	62.53	77.35	132.9	14.55	49.16	6.93	1.435	3.789	0.592	2.884	0.507	1.31	0.183	1.237	0.189	3.3	22.37	56.8	-963	2425	13	1.17219	265.5	0.291918	1.07923
2008	[12247] WANG QIANG(2008) [GeoReM [4035] ]	samp. 5130-5	CENTRAL ASIAN FOLDBELT - CENOZOIC/QUATERNARY / CHINA - CENOZOIC/QUATERNARY / TIBET / DUOGECUOREN ADAKITES	Central Asian	34	88	EOCENE	CENOZOIC	61.9512	0.823489	15.3407	5.05	4.545		4.7048	3.28701	0.419689	3.50429	3.542	0.265898	1047.3	14.32	73.14	258	67.34	70.51	119.5	13.41	45.09	6.442	1.319	4.154	0.544	2.633	0.464	1.198	0.173	1.047	0.168	3.22	22.47	46.3	-897	4525	13	0.289878	258	0.300916	1.03097
2008	[12247] WANG QIANG(2008) [GeoReM [4035] ]	samp. 5131-2-1	CENTRAL ASIAN FOLDBELT - CENOZOIC/QUATERNARY / CHINA - CENOZOIC/QUATERNARY / TIBET / DUOGECUOREN ADAKITES	Central Asian	34	88	EOCENE	CENOZOIC	62.8956	0.795393	15.4769	5.07	4.563		4.53801	3.31166	0.420546	3.46458	3.82106	0.302865	1092.3	13.9	78.58	265.9	77.33	78.34	133.9	14.91	48.98	7.011	1.446	4.014	0.549	2.613	0.46	1.188	0.169	1.013	0.164	3.25	23.35	47.6	-973	3778	13	0.538956	265.9	0.303588	1.04669
2008	[12247] WANG QIANG(2008) [GeoReM [4035] ]	samp. 5079-6-1	CENTRAL ASIAN FOLDBELT - CENOZOIC/QUATERNARY / CHINA - CENOZOIC/QUATERNARY / TIBET / DUOGECUOREN ADAKITES	Central Asian	34	88	EOCENE	CENOZOIC	64.477	0.662	15.315	4.241	3.8169		3.917	3.007	0.440657	4.137	3.084	0.164	1088.7	9.886	110.13	254.6	74.61	57.3	113	11.07	38.02	5.269	1.266	2.828	0.426	2.081	0.37	0.95	0.126	0.768	0.119	2.98	23.42	46.1	-911	-976	13	1.03464	254.6	0.300412	1.07301
2008	[12084] DANYUSHEVSKY L. V. (2008)	samp. AV54	TONGA ARC / FIJI ISLANDS / KA(N)DAVU ISLAND GROUP	Tonga Arc	-19.148	-178.02	PLEISTOCENE	QUATERNARY	59.37	1.02	16.57		4.73		7.26	3.87	0.45	1.72	4.82	0.56	1580	13	121.54	174	34.72	33.33	71.83	9.11	34.89	5.83	1.54	3.98	0.51	2.44	0.44	1.13		0.96	0.14	3.01	19.68	3.6	-1005	3609	12	0.312513	174	0.325029	0.988018
2008	[12084] DANYUSHEVSKY L. V. (2008)	samp. ST27	TONGA ARC / FIJI ISLANDS / KA(N)DAVU ISLAND GROUP	Tonga Arc	-19.158	-178.147	PLEISTOCENE	QUATERNARY	58.49	0.71	15.55		5.57		7.61	4.86	0.465964	2.17	4.39	0.53	1512	19	79.58	182	29.85	40.3	88.9	11.8	48.7	8.23	2.21	5.59	0.66	3.3	0.61	1.6	0.22	1.35	0.22	3.33	18.82	2.6	-1221	5438	13	0.853955	182	0.305022	0.973373
2008	[12247] WANG QIANG(2008) [GeoReM [4035] ]	samp. 8540	CENTRAL ASIAN FOLDBELT - CENOZOIC/QUATERNARY / CHINA - CENOZOIC/QUATERNARY / TIBET / DUOGECUOREN ADAKITES	Central Asian	34	88	EOCENE	CENOZOIC	59.618	0.875	15.095	5.47	4.923		6.244	4.327	0.467784	4.074	2.834	0.273	1936.6	14.8	130.85	308.1	59.68	74.48	129.7	14.89	51.74	7.191	1.808	4.106	0.605	2.901	0.521	1.333	0.191	1.248	0.217	3.33	22.01	54.9	-1130	4868	13	0.91977	308.1	0.296097	0.992145
2008	[12247] WANG QIANG(2008) [GeoReM [4035] ]	samp. 5137-1	CENTRAL ASIAN FOLDBELT - CENOZOIC/QUATERNARY / CHINA - CENOZOIC/QUATERNARY / TIBET / DUOGECUOREN ADAKITES	Central Asian	34	88	EOCENE	CENOZOIC	57.252	0.893	16.47	6.255	5.62951		6.387	4.987	0.46974	3.354	3.353	0.09	1249.9	8.73	143.17	229.1	26.7	22.51	40.65	4.822	18.39	3.218	1.371	2.302	0.33	1.862	0.346	0.927	0.134	0.843	0.139	2.65	16.85	42.8	-707	3704	13	0.519129	229.1	0.323068	0.952771
2008	[12247] WANG QIANG(2008) [GeoReM [4035] ]	samp. 9020-6	CENTRAL ASIAN FOLDBELT - CENOZOIC/QUATERNARY / CHINA - CENOZOIC/QUATERNARY / TIBET / DUOGECUOREN ADAKITES	Central Asian	34	88	EOCENE	CENOZOIC	60.128	0.915	14.669	5.445	4.9005		5.795	4.344	0.469901	4.627	2.886	0.447	1999.5	16.58	120.6	373.3	63.49	87.11	156.5	19.06	69.57	10.01	2.297	5.296	0.749	3.498	0.605	1.531	0.207	1.372	0.208	3.51	22.95	29.6	-1166	4865	13	1.18936	373.3	0.28774	1.00063
2008	[12247] WANG QIANG(2008) [GeoReM [4035] ]	samp. 5144-1	CENTRAL ASIAN FOLDBELT - CENOZOIC/QUATERNARY / CHINA - CENOZOIC/QUATERNARY / TIBET / DUOGECUOREN ADAKITES	Central Asian	34	88	EOCENE	CENOZOIC	63.89	0.599	15.309	4.291	3.8619		4.207	3.514	0.476416	3.508	3.576	0.156	1494.9	9.776	152.92	205.4	61.69	52.44	94.27	10.17	35.51	5.139	1.388	2.696	0.402	2.026	0.378	0.991	0.138	0.85	0.14	2.97	22.1	55.5	-1019	1048	13	1.52881	205.4	0.300294	1.06324
2008	[12084] DANYUSHEVSKY L. V. (2008)	samp. AV48	TONGA ARC / FIJI ISLANDS / KA(N)DAVU ISLAND GROUP	Tonga Arc	-19.148	-177.973	PLEISTOCENE	QUATERNARY	63.39	0.89	15.84		3.69		5.56	3.37	0.477337	2.03	4.61	0.55	1377	14	98.36	172	33.48	34.48	74.27	9.15	35.42	5.87	1.58	4.08	0.52	2.52	0.46	1.2		1.03	0.15	3.05	19.42	8.6	-987	3270	12	0.366959	172	0.31071	1.05492
2008	[12084] DANYUSHEVSKY L. V. (2008)	samp. ST31	TONGA ARC / FIJI ISLANDS / KA(N)DAVU ISLAND GROUP	Tonga Arc	-19.158	-178.147	PLEISTOCENE	QUATERNARY	58.32	0.71	15.43		5.58		7.71	5.13	0.478992	2.13	4.32	0.52	1497	22	68.05	180	24.39	41.7	96.6	12.8	53.2	9.13	2.43	6.56	0.75	3.83	0.73	1.99	0.27	1.71	0.29	3.48	17.74	7.4	-1293	5339	13	1.16071	180	0.302668	0.970544
2008	[12247] WANG QIANG(2008) [GeoReM [4035] ]	samp. 9013-1	CENTRAL ASIAN FOLDBELT - CENOZOIC/QUATERNARY / CHINA - CENOZOIC/QUATERNARY / TIBET / DUOGECUOREN ADAKITES	Central Asian	34	88	EOCENE	CENOZOIC	62	0.79	15.296	5.042	4.5378		4.455	4.178	0.479359	4.414	2.861	0.074	1600.7	10.62	150.73	270.6	79.81	68.88	110.4	11.99	41.53	5.86	1.523	3.086	0.453	2.226	0.399	1.037	0.137	0.863	0.132	3.07	23.39	50.7	-859	2584	13	1.56827	270.6	0.300039	1.03179
2008	[12247] WANG QIANG(2008) [GeoReM [4035] ]	samp. 7509-1	CENTRAL ASIAN FOLDBELT - CENOZOIC/QUATERNARY / CHINA - CENOZOIC/QUATERNARY / TIBET / DUOGECUOREN ADAKITES	Central Asian	34	88	EOCENE	CENOZOIC	59.775	1.131	15.15	5.567	5.01031		4.379	4.662	0.481995	4.956	3.062	0.044	1496	8.58	174.36	431.1	24.47	24.71	38.76	4.145	15.19	2.919	1.597	2.124	0.329	1.789	0.335	0.839	0.143	1.01	0.158	2.63	16.07	69.2	-558	9107	13	0.661582	431.1	0.297175	0.994758
2008	[12247] WANG QIANG(2008) [GeoReM [4035] ]	samp. 5079-5-1	CENTRAL ASIAN FOLDBELT - CENOZOIC/QUATERNARY / CHINA - CENOZOIC/QUATERNARY / TIBET / DUOGECUOREN ADAKITES	Central Asian	34	88	EOCENE	CENOZOIC	62.349	0.74	15.139	4.962	4.4658		4.489	4.308	0.491007	3.919	2.828	0.101	1606.6	12.83	125.22	279.1	70.29	73.87	128.9	13.6	46.62	6.446	1.556	3.775	0.513	2.564	0.462	1.24	0.174	1.051	0.174	3.23	22.71	56.7	-971	2343	13	0.610234	279.1	0.29696	1.03759
2008	[12247] WANG QIANG(2008) [GeoReM [4035] ]	samp. 5130-1	CENTRAL ASIAN FOLDBELT - CENOZOIC/QUATERNARY / CHINA - CENOZOIC/QUATERNARY / TIBET / DUOGECUOREN ADAKITES	Central Asian	34	88	EOCENE	CENOZOIC	55.333	1.013	15.108	7.204	6.48361		6.643	6.341	0.49444	3.344	3.124	0.283	1615.5	14.86	108.71	314.2	48.6	60.51	119.2	12.91	46.82	7.132	2.112	4.437	0.615	3.18	0.582	1.479	0.203	1.245	0.206	3.32	20.79	38.5	-915	2008	13	0.521586	314.2	0.296352	0.920835
2008	[12247] WANG QIANG(2008) [GeoReM [4035] ]	samp. 3118	CENTRAL ASIAN FOLDBELT - CENOZOIC/QUATERNARY / CHINA - CENOZOIC/QUATERNARY / TIBET / DUOGECUOREN ADAKITES	Central Asian	34	88	EOCENE	CENOZOIC	61.0083	0.576759	15.2791	4.83437	4.35093		6.1521	4.36775	0.500964	3.60875	3.75695	0.211278	2471.9	13.9	177.83	169.1	37.93	55.99	105.7	13.01	48.92	7.565	1.759	4.115	0.585	2.801	0.543	1.423	0.22	1.476	0.248	3.32	20.02	50.7	-1388	5446	13	1.28717	169.1	0.299708	1.01528
2008	[12247] WANG QIANG(2008) [GeoReM [4035] ]	samp. LQS-7	CENTRAL ASIAN FOLDBELT - CENOZOIC/QUATERNARY / CHINA - CENOZOIC/QUATERNARY / TIBET / DUOGECUOREN ADAKITES	Central Asian	34	88	EOCENE	CENOZOIC	57.3098	0.777216	15.5019	5.94686	5.35218		7.0859	6.06713	0.531305	2.46405	3.8881	0.484118	2256.1	16.9	133.5	223.2	52.92	76.9	133.7	15.53	54.88	7.967	1.844	4.442	0.674	3.243	0.606	1.518	0.215	1.453	0.24	3.43	21.41	52.7	-1083	4346	13	1.24159	223.2	0.304077	0.953733
2008	[12247] WANG QIANG(2008) [GeoReM [4035] ]	samp. 5141	CENTRAL ASIAN FOLDBELT - CENOZOIC/QUATERNARY / CHINA - CENOZOIC/QUATERNARY / TIBET / DUOGECUOREN ADAKITES	Central Asian	34	88	EOCENE	CENOZOIC	61.582	0.673	14.547	5.217	4.6953		4.909	5.816	0.553309	3.019	3.154	0.045	1443.3	9.77	147.73	198	42.06	39.28	66.23	6.787	22.68	3.531	1.328	2.264	0.359	1.967	0.375	1.003	0.15	0.934	0.153	2.82	19.14	75.5	-636	185	13	0.708432	198	0.285347	1.02483
2009	[13668] YAMAMOTO T. (2009)	samp. R304	HONSHU ARC / NORTHEASTERN HONSHU ARC / HONSHU / RYOZEN FORMATION	Honshu Arc	37.8258	140.851	MIOCENE	CENOZOIC	65.54	0.5	16.25	4.04	3.636		5.23	1.77	0.327414	0.8	4.17	0.15	418.3	12.02	34.8	141.1	11.59	11.59	25.1	2.87	12.43	2.85	0.87	2.51	0.36	2.04	0.39	1.1	0.14	1	0.15	2.54	12.37	14.9	-433	5741	13	0.791238	141.1	0.318752	1.0907
2009	[13668] YAMAMOTO T. (2009)	samp. R303	HONSHU ARC / NORTHEASTERN HONSHU ARC / HONSHU / RYOZEN FORMATION	Honshu Arc	37.8258	140.851	MIOCENE	CENOZOIC	66.48	0.35	15.81	3	2.7		4.4	1.39	0.339853	1.33	4.1	0.11	417.12	3.73	111.83	60.68	20.2	6.06	13.99	1.54	6.4	1.31	0.43	1	0.15	0.69	0.12	0.33	0.06	0.3	0.05	1.64	15.64	13.8	-776	6117	13	3.00521	60.68	0.310122	1.10634
2009	[13668] YAMAMOTO T. (2009)	samp. R301	HONSHU ARC / NORTHEASTERN HONSHU ARC / HONSHU / RYOZEN FORMATION	Honshu Arc	37.8258	140.851	MIOCENE	CENOZOIC	67.18	0.314	15.66	2.9	2.61		4.16	1.38	0.345864	1.47	3.99	0.1	469	8	58.63	83	13.2	6.6	12.4	1.73	7.3	1.5	0.56	1.6	0.2	1.1	0.2	0.6	0.08	0.5	0.08	1.95	12.65	6.8	-449	7572	13	1.67411	83	0.307179	1.11799
2009	[13668] YAMAMOTO T. (2009)	samp. R305	HONSHU ARC / NORTHEASTERN HONSHU ARC / HONSHU / RYOZEN FORMATION	Honshu Arc	37.8258	140.851	MIOCENE	CENOZOIC	64.19	0.374	15.9	4.2	3.78		4.72	2.52	0.4	1.26	3.68	0.1	650.05	5.79	112.27	68.32	12.66	5.57	12.36	1.37	6.27	1.5	0.56	1.33	0.19	0.94	0.18	0.53	0.08	0.44	0.07	1.84	12.49	5.2	-430	6984	13	1.89337	68.32	0.311887	1.06823
2010	[15010] TOKUNAGA S. (2010)	samp. K5	HONSHU ARC / SOUTHWESTERN HONSHU ARC / HONSHU / DAISEN	Honshu Arc	35.38	133.57	QUATERNARY	QUATERNARY	65.12	0.43	16.88				4.78	1.93		1.76	4.28	0.14	666	9	74	119	16.55	9.65	18.1	1.87	6.61	1.22	0.605	0.982	0.154	0.928	0.187	0.554	0.086	0.583	0.092	1.93	13.89	81.6	-522	-551	13	0.160495	119	0.33111	1.08371
2010	[15010] TOKUNAGA S. (2010)	samp. M3	HONSHU ARC / SOUTHWESTERN HONSHU ARC / HONSHU / DAISEN / MISEN LAVA DOME	Honshu Arc	35.3709	133.54	QUATERNARY	QUATERNARY	65.49	0.04	17.16				4.84	1.73		1.71	4.34	0.14	688	9	76.44	113	19.35	11.4	22.1	2.26	7.87	1.37	0.648	1.06	0.16	0.948	0.191	0.557	0.084	0.589	0.089	2.01	15.2	79.7	-632	-1490	13	0.210003	113	0.336603	1.08987
2010	[15010] TOKUNAGA S. (2010)	samp. M1	HONSHU ARC / SOUTHWESTERN HONSHU ARC / HONSHU / DAISEN / MISEN LAVA DOME	Honshu Arc	35.3709	133.54	QUATERNARY	QUATERNARY	64.41	0.47	17.11				4.82	2.02		1.78	4.3	0.14	688	9	76.44	120	28.66	19.4	35.5	3.72	12.9	2.2	0.738	1.63	0.233	1.32	0.257	0.711	0.104	0.677	0.1	2.36	17.32	62.8	-566	-165	13	0.196679	120	0.335622	1.07189
2010	[15010] TOKUNAGA S. (2010)	samp. M2	HONSHU ARC / SOUTHWESTERN HONSHU ARC / HONSHU / DAISEN / MISEN LAVA DOME	Honshu Arc	35.3709	133.54	QUATERNARY	QUATERNARY	64.81	0.42	17.09				4.87	1.88		1.72	4.29	0.14	692	9	76.89	113	18.85	11.1	20.5	2.18	7.63	1.38	0.656	1.09	0.165	0.997	0.198	0.566	0.088	0.589	0.092	2.01	14.71	76.1	-552	-232	13	0.133639	113	0.33523	1.07855
2010	[15010] TOKUNAGA S. (2010)	samp. K1	HONSHU ARC / SOUTHWESTERN HONSHU ARC / HONSHU / DAISEN	Honshu Arc	35.38	133.57	QUATERNARY	QUATERNARY	62.69	0.47	18.03				4.59	2.21		1.59	4.27	0.14	755	9	83.89	134	23.68	13	28.4	2.57	8.93	1.58	0.582	1.24	0.18	1.01	0.197	0.563	0.083	0.549	0.082	2.08	16.51	66.9	-571	-1673	13	0.857576	134	0.353668	1.04327
2010	[15010] TOKUNAGA S. (2010)	samp. K4	HONSHU ARC / SOUTHWESTERN HONSHU ARC / HONSHU / DAISEN	Honshu Arc	35.38	133.57	QUATERNARY	QUATERNARY	64.17	0.47	17.06				4.5	2.2		2.05	4.46	0.19	788	9	87.56	137	33.16	18.7	33.7	3.29	10.9	1.74	0.642	1.26	0.179	0.994	0.197	0.554	0.085	0.564	0.087	2.17	18.15	83.2	-684	-24	13	0.162613	137	0.334641	1.0679
2010	[15010] TOKUNAGA S. (2010)	samp. K7	HONSHU ARC / SOUTHWESTERN HONSHU ARC / HONSHU / DAISEN	Honshu Arc	35.38	133.57	QUATERNARY	QUATERNARY	64.64	0.45	16.97				4.48	2.01		2.05	4.5	0.22	792	9	88	144	29.15	20.2	37.5	3.92	13.5	2.25	0.724	1.68	0.235	1.33	0.257	0.713	0.105	0.693	0.103	2.39	17.55	64.5	-632	-11	13	0.146681	144	0.332876	1.07572
2010	[15010] TOKUNAGA S. (2010)	samp. M4	HONSHU ARC / SOUTHWESTERN HONSHU ARC / HONSHU / DAISEN / MISEN LAVA DOME	Honshu Arc	35.3709	133.54	QUATERNARY	QUATERNARY															#DIV/0!		19.2	12	23.4	2.47	8.67	1.55	0.657	1.22	0.183	1.08	0.212	0.614	0.094	0.625	0.097	2.11	15.04	71.1	-609	-761	13	0.112823	0	0	0
2011	[15743] HIDALGO P. J. (2011)	samp. GT-05-30-06-4B	CENTRAL AMERICAN VOLCANIC ARC / CENTRAL AMERICAN VOLCANIC ARC-SOUTHEASTERN SEGMENT / PANAMA / EL VALLE / EL HATO UNIT	Central American	8.5679	-80.0294	QUATERNARY	QUATERNARY	68.67	0.2	18.52	2.52	2.268		3.84	0.89	0.281824	1.24	4.02	0.04	661	7.43	88.96	67	10.04	7.13	16.39	1.81	7.04	1.59	0.59	1.58	0.25	1.26	0.21	0.64		0.71	0.1	2.07	11.99	27.2	-481	6631	12	2.95347	67	0.36328	1.14279
2011	[15743] HIDALGO P. J. (2011)	samp. RM-05-29-06-1B	CENTRAL AMERICAN VOLCANIC ARC / CENTRAL AMERICAN VOLCANIC ARC-SOUTHEASTERN SEGMENT / PANAMA / EL VALLE / EL HATO UNIT	Central American	8.4914	-80.1838	QUATERNARY	QUATERNARY	68.58	0.22	17.21	2.88	2.592		4.23	1.04	0.286343	1.1	4.55	0.1	600	5.94	101.01	60	12.49	7.62	16.71	1.82	7.08	1.4	0.55	1.35	0.23	1	0.19	0.48		0.61	0.1	1.98	13.12	41.9	-704	9861	12	3.88134	60	0.337583	1.14129
2011	[15743] HIDALGO P. J. (2011)	samp. RH-06-02-06-1A	CENTRAL AMERICAN VOLCANIC ARC / CENTRAL AMERICAN VOLCANIC ARC-SOUTHEASTERN SEGMENT / PANAMA / EL VALLE / EL HATO UNIT	Central American	8.4914	-80.1838	QUATERNARY	QUATERNARY	68.12	0.23	17.77	2.79	2.511		4.24	1.01	0.28685	1.3	4.4	0.08	700	5.23	133.84	69	15.31	7.81	16.45	1.99	7.4	1.4	0.6	1.34	0.22	0.92	0.16	0.44		0.51	0.08	1.92	14.48	30	-754	9806	12	3.95317	69	0.348568	1.13363
2011	[15743] HIDALGO P. J. (2011)	samp. GT-05-30-06-2B	CENTRAL AMERICAN VOLCANIC ARC / CENTRAL AMERICAN VOLCANIC ARC-SOUTHEASTERN SEGMENT / PANAMA / EL VALLE / EL HATO UNIT	Central American	8.5508	-80.0157	QUATERNARY	QUATERNARY	68.63	0.22	17.75	2.63	2.367		4.06	0.96	0.288548	1.28	4.35	0.05	686	5.04	136.11	70	14.31	6.87	15.22	1.56	5.95	1.17	0.5	1.13	0.18	0.83	0.14	0.39		0.48	0.08	1.79	13.9	46	-728	10724	12	3.97753	70	0.348176	1.14212
2011	[15552] CHASHCHIN A. A. (2011)	samp. MH08/2-4	SIKHOTE-ALIN-SAKHALIN ARC / SIKHOTE ALIN ARC / SIKHOTE-ALIN BELT - CENOZOIC	Sikhote-Alin-Sakhalin Arc	43	131.5	EOCENE	CENOZOIC	63.73	0.62	15.99		3.5	3.5	4.21	1.53	0.304175	2.54	3.81	0.21	656	8.97	73.13	166	37.3	30.92	59.14	6.45	22.54	3.56	1.067	2.864	0.357	1.874	0.364	0.959		0.829	0.131	2.77	18.98	43.7	-689	1849	12	0.583595	166	0.313652	1.06058
2011	[14915] GAZEL E. (2011)	samp. TA-040107-4	CENTRAL AMERICAN VOLCANIC ARC / CENTRAL AMERICAN VOLCANIC ARC-SOUTHEASTERN SEGMENT / COSTA RICA	Central American	9.2468	-83.2642	PLIOCENE	CENOZOIC	48.55	0.67	18.62	9.72	8.74801		9.4	4.23	0.325936	1.7	2.89	0.36	1090	15.34	71.06	70	24.09	32.76	63.06	7.08	27.4	4.87	1.53	4.69	0.58	2.56	0.48	1.37		1.36	0.21	3.08	16.8	31.1	-735	10403	12	2.50108	70	0.365241	0.807955
2011	[14915] GAZEL E. (2011)	samp. TC-3	CENTRAL AMERICAN VOLCANIC ARC / CENTRAL AMERICAN VOLCANIC ARC-SOUTHEASTERN SEGMENT / COSTA RICA	Central American	9.0907	-83.2715	PLIOCENE	CENOZOIC	49.73	0.9	17.84	9.96	8.96401		9.55	4.52	0.335212	1.8	2.83	0.4	1177	18.12	64.96	100	14.81	23.69	50.1	6.56	26.42	5.33	1.57	4.64	0.62	3.41	0.63	1.71		1.6	0.24	3.14	14.12	12	-683	4622	12	0.230491	100	0.349941	0.827592
2011	[15743] HIDALGO P. J. (2011)	samp. LT-5-31-06-1	CENTRAL AMERICAN VOLCANIC ARC / CENTRAL AMERICAN VOLCANIC ARC-SOUTHEASTERN SEGMENT / PANAMA / EL VALLE / EL HATO UNIT	Central American	8.578	-80.1185	QUATERNARY	QUATERNARY	56.94	0.66	17.26	7.31	6.57901		7.2	3.72	0.3612	1.02	3.29	0.29	637	14.69	43.36	78	11.89	15.93	29.05	3.69	15.02	3.09	1.05	2.89	0.43	2.39	0.46	1.3		1.34	0.19	2.75	12.28	33.6	-408	4877	12	0.488542	78	0.338564	0.947579
2011	[14915] GAZEL E. (2011)	samp. M63AKH	CENTRAL AMERICAN VOLCANIC ARC / CENTRAL AMERICAN VOLCANIC ARC-SOUTHEASTERN SEGMENT / PANAMA	Central American	8.14	-82.874	PLEISTOCENE	QUATERNARY	64.34	0.54	15.58	4.28	3.852		4.8	2.25	0.368731	2.65	3.74	0.17	1019	9	113.22	101	34.18	20.85	37.74	4.55	16.5	2.9	0.14	2.34	0.3	1.46	0.26	0.69		0.61	0.09	2.46	18.64	21.2	-636	6764	12	0.490092	101	0.30561	1.07073
2011	[14915] GAZEL E. (2011)	samp. TC-5D	CENTRAL AMERICAN VOLCANIC ARC / CENTRAL AMERICAN VOLCANIC ARC-SOUTHEASTERN SEGMENT / COSTA RICA	Central American	8.8498	-82.9452	PLIOCENE	CENOZOIC	60.51	0.63	16.27	4.96	4.464		5.77	2.85	0.389663	2.67	3.51	0.25	1289	7.79	165.47	113	41.52	26.57	52.08	6.1	22.06	3.64	0.96	2.7	0.32	1.57	0.28	0.71		0.64	0.09	2.6	20.4	17.4	-843	5294	12	0.567054	113	0.319145	1.00699
2011	[14915] GAZEL E. (2011)	samp. M53KH	CENTRAL AMERICAN VOLCANIC ARC / CENTRAL AMERICAN VOLCANIC ARC-SOUTHEASTERN SEGMENT / PANAMA / BARVA	Central American	8.794	-82.585	PLEISTOCENE	QUATERNARY	59.83	0.68	16.43	6.19	5.57101		6.65	3.61	0.393203	3.01	2.97	0.25	1528	10.16	150.39	133	33.7	30.33	59.82	7.05	26.59	4.63	1.33	3.53	0.47	2.18	0.4	1.03		0.9	0.13	2.88	18.91	13.4	-716	5490	12	0.381473	133	0.322283	0.995673
2011	[19747] IMAOKA T. (2011)	samp. 1307	HONSHU ARC / SOUTHWESTERN HONSHU ARC / HONSHU	Honshu Arc	34.6747	131.907	PALEOCENE	CENOZOIC	53.27	0.76	17.48	7.24	6.51601		8.7	4.53	0.410103	2.17	3.07	0.41	1720	16.7	102.99	152	31.7	46.6	110	13.6	53.8	9.31	2.35	6.06	0.7	3.51	0.61	1.73	0.214	1.47	0.189	3.4	19.95	-3	-1142	2406	13	1.75754	152	0.34288	0.886504
2011	[14915] GAZEL E. (2011)	samp. TC-5A	CENTRAL AMERICAN VOLCANIC ARC / CENTRAL AMERICAN VOLCANIC ARC-SOUTHEASTERN SEGMENT / COSTA RICA	Central American	8.8498	-82.9452	PLIOCENE	CENOZOIC	56.66	0.73	15.87	7.23	6.50701		7.21	4.62	0.415206	2.39	3.24	0.26	1204	9.63	125.03	104	34.14	26.97	53.69	6.42	23.83	4.1	1.12	3.12	0.38	1.9	0.34	0.89		0.79	0.12	2.75	19.06	18.3	-853	5962	12	0.366854	104	0.311299	0.942919
2011	[19747] IMAOKA T. (2011)	samp. SK-033	HONSHU ARC / SOUTHWESTERN HONSHU ARC / HONSHU	Honshu Arc	34.8747	132.669	PALEOCENE	CENOZOIC	52.43	0.77	17.85	7.41	6.66901		9.09	4.81	0.419026	2.11	2.87	0.37	2150	16.7	128.74	153	32.17	46	113	14	55.9	9.62	2.46	6.22	0.69	3.56	0.59	1.69	0.207	1.43	0.179	3.4	20.29	-9.1	-1196	2168	13	2.10133	153	0.350137	0.872525
2011	[19747] IMAOKA T. (2011)	samp. 52602	HONSHU ARC / SOUTHWESTERN HONSHU ARC / HONSHU	Honshu Arc	34.6703	131.902	PALEOCENE	CENOZOIC	53.74	0.75	17.61	6.99	6.29101		9.36	4.69	0.427101	1.69	1.9	0.36	2540	14.8	171.62	143	28.58	38.3	93.5	11.7	46	7.76	2.05	5.07	0.6	3.04	0.54	1.53	0.2	1.34	0.164	3.25	19.54	-0.3	-1158	-453	13	1.87765	143	0.34543	0.894325
2011	[15552] CHASHCHIN A. A. (2011)	samp. MH08/2-2	SIKHOTE-ALIN-SAKHALIN ARC / SIKHOTE ALIN ARC / SIKHOTE-ALIN BELT - CENOZOIC	Sikhote-Alin-Sakhalin Arc	43	131.5	EOCENE	CENOZOIC	63.05	0.69	16.03		2.23	2.23	4.14	1.69	0.431122	2.45	3.57	0.23	706	8.59	82.19	139	40.84	33.08	64.14	6.53	23.06	3.75	1.12	3.09	0.36	1.79	0.33	0.93		0.81	0.1	2.75	20.09	31.9	-547	1555	12	2.2052	139	0.314437	1.04926
2011	[19747] IMAOKA T. (2011)	samp. 121403	HONSHU ARC / SOUTHWESTERN HONSHU ARC / HONSHU	Honshu Arc	34.6597	131.918	PALEOCENE	CENOZOIC	52.67	0.78	17.64	7.62	6.85801		7.51	5.23	0.43266	2.4	2.69	0.45	1410	16.1	87.58	176	33.05	46.6	114	14.1	56.1	9.71	2.47	6.09	0.68	3.5	0.57	1.67	0.203	1.41	0.175	3.39	20.5	-8.4	-1219	2272	13	2.38472	176	0.346018	0.876519
2011	[14915] GAZEL E. (2011)	samp. M55KH	CENTRAL AMERICAN VOLCANIC ARC / CENTRAL AMERICAN VOLCANIC ARC-SOUTHEASTERN SEGMENT / PANAMA / BARVA	Central American	8.796	-82.474	PLEISTOCENE	QUATERNARY	55.91	0.76	16.44	7.28	6.55201		8.1	5.11	0.438175	1.92	3.29	0.29	1370	11.26	121.67	126	32.06	33.02	62.87	7.63	27.9	4.45	0.44	3.49	0.44	2.2	0.4	1.11		1.03	0.15	2.93	18.73	32.1	-857	3948	12	0.696509	126	0.322479	0.930438
2011	[14915] GAZEL E. (2011)	samp. TC-6A	CENTRAL AMERICAN VOLCANIC ARC / CENTRAL AMERICAN VOLCANIC ARC-SOUTHEASTERN SEGMENT / COSTA RICA	Central American	8.9143	-82.7877	PLIOCENE	CENOZOIC	54.64	0.98	16.15	7.69	6.92101		7.84	5.47	0.441449	1.72	3.18	0.28	1146	12.66	90.52	111	22.87	23.56	46.91	5.81	22.1	4.04	1.2	3.41	0.45	2.44	0.44	1.17		1.03	0.15	2.85	16.42	16.7	-586	3160	12	0.229029	111	0.316791	0.909303
2011	[14915] GAZEL E. (2011)	samp. M66AKH	CENTRAL AMERICAN VOLCANIC ARC / CENTRAL AMERICAN VOLCANIC ARC-SOUTHEASTERN SEGMENT / PANAMA	Central American	8.529	-82.694	PLEISTOCENE	QUATERNARY	56.82	0.83	16.92	7.08	6.37201		7.53	5.09	0.444076	1.37	3.73	0.27	964	10	96.4	89	21.13	24.3	45.85	5.5	21.08	3.82	1.14	3.39	0.44	2.42	0.46	1.23		1.15	0.17	2.87	15.74	30.8	-550	3904	12	0.431727	89	0.331895	0.945582
2011	[15552] CHASHCHIN A. A. (2011)	samp. MH08/2-1	SIKHOTE-ALIN-SAKHALIN ARC / SIKHOTE ALIN ARC / SIKHOTE-ALIN BELT - CENOZOIC	Sikhote-Alin-Sakhalin Arc	43	131.5	EOCENE	CENOZOIC	64.2	0.65	16.43		2.23	2.23	4.06	1.79	0.445274	2.73	3.87	0.23	640	9.15	69.95	144	39.02	33.56	64.18	6.83	23.93	3.91	1.11	2.91	0.38	1.92	0.37	0.92		0.86	0.14	2.81	19.34	45.3	-777	4480	12	0.273507	144	0.322283	1.0684
2011	[14915] GAZEL E. (2011)	samp. TC-8	CENTRAL AMERICAN VOLCANIC ARC / CENTRAL AMERICAN VOLCANIC ARC-SOUTHEASTERN SEGMENT / COSTA RICA	Central American	8.6248	-82.9178	PLIOCENE	CENOZOIC	55.69	1.15	14.24	6.62	5.95801		8.17	4.91	0.451785	3.65	2.96	0.56	2134	15.04	141.89	256	66.86	74.21	169	17.8	64.66	9.77	2.39	6.53	0.73	3.28	0.55	1.38		1.11	0.15	3.43	23.81	-0.2	-1007	3851	12	1.01955	256	0.279325	0.926777
2011	[14915] GAZEL E. (2011)	samp. M65AKH	CENTRAL AMERICAN VOLCANIC ARC / CENTRAL AMERICAN VOLCANIC ARC-SOUTHEASTERN SEGMENT / PANAMA / CHIRIQUI	Central American	8.47	-82.71	PLEISTOCENE	QUATERNARY	55.96	0.94	15.86	6.99	6.29101		7.66	5.36	0.460046	2.81	2.93	0.47	2006	11.75	170.72	182	57.88	66.56	127.81	14.69	52.55	7.72	2.07	6.08	0.67	3.12	0.54	1.4		1.15	0.17	3.35	22.15	15	-865	5910	12	1.28343	182	0.311102	0.93127
2011	[14915] GAZEL E. (2011)	samp. TC-7	CENTRAL AMERICAN VOLCANIC ARC / CENTRAL AMERICAN VOLCANIC ARC-SOUTHEASTERN SEGMENT / COSTA RICA	Central American	8.8999	-82.7894	PLIOCENE	CENOZOIC	55.44	0.77	16.09	7.1	6.39001		7.78	5.79	0.475369	1.96	3.36	0.23	1029	9.41	109.35	93	26.49	20.66	41.06	5.01	18.9	3.53	1.02	2.88	0.36	1.88	0.34	0.89		0.78	0.12	2.65	17.29	15	-691	5961	12	0.339238	93	0.315614	0.922616
2011	[14915] GAZEL E. (2011)	samp. M44KH	CENTRAL AMERICAN VOLCANIC ARC / CENTRAL AMERICAN VOLCANIC ARC-SOUTHEASTERN SEGMENT / PANAMA / BARVA	Central American	9.669	-82.621	PLEISTOCENE	QUATERNARY	54.91	0.73	15.77	7.35	6.61501		8.2	7.04	0.515562	1.61	3.19	0.29	1120	10.02	111.78	91	26.11	23.5	43.82	5.35	19.85	3.55	0.65	2.99	0.39	2	0.36	0.98		0.9	0.13	2.72	17.16	24.6	-617	5236	12	0.491063	91	0.309337	0.913796
2011	[14915] GAZEL E. (2011)	samp. M57AKH	CENTRAL AMERICAN VOLCANIC ARC / CENTRAL AMERICAN VOLCANIC ARC-SOUTHEASTERN SEGMENT / PANAMA / TIZINGAL VOLCANIC COMPLEX	Central American	8.796	-82.474	PLEISTOCENE	QUATERNARY	52.4	0.86	15.62	8.18	7.36201		8.98	8.41	0.533223	1.15	2.95	0.28	861	12.06	71.39	92	21.23	23.56	45.24	5.57	20.78	3.75	0.81	3.24	0.45	2.37	0.44	1.18		1.11	0.16	2.85	15.92	27.7	-563	3180	12	0.290588	92	0.306395	0.872025
2011	[14915] GAZEL E. (2011)	samp. TC-6B	CENTRAL AMERICAN VOLCANIC ARC / CENTRAL AMERICAN VOLCANIC ARC-SOUTHEASTERN SEGMENT / COSTA RICA	Central American	8.9143	-82.7877	PLIOCENE	CENOZOIC														12.25			22.46	23.36	47.8	5.89	22.16	4.08	1.21	3.44	0.45	2.44	0.45	1.15		1.04	0.15	2.86	16.45	15.9	-607	2823	12	0.224948	0	0	0
2013	[17183] FOLEY F. V.(2013) [GeoReM [7461] ]	samp. P79781	NEW ZEALAND / SOUTH ISLAND / SOLANDER (HAUTERE) ISLAND	New Zealand	-46.5769	166.902	QUATERNARY	QUATERNARY	61.59	0.5	18.8	3.97	3.573		5.55	1.71	0.32368	2.04	4.47	0.29	1153	11.29	102.13	100.93	18.54	24.27	50.51	5.76	22.64	3.93	1.133	2.84	0.366	2.129	0.416	1.15		1.309	0.193	2.86	15.97	54.5	-1064	2762	12	0.936258	100.93	0.368772	1.02496
2013	[17183] FOLEY F. V.(2013) [GeoReM [7461] ]	samp. P79791	NEW ZEALAND / SOUTH ISLAND / SOLANDER (HAUTERE) ISLAND	New Zealand	-46.5719	166.903	QUATERNARY	QUATERNARY	60.69	0.51	18.53	4.24	3.816		5.62	2.1	0.354969	2	4.38	0.26	1079	10.86	99.36	101.93	24.43	30	51.44	5.66	22.02	3.69	1.127	2.688	0.343	2.082	0.405	1.08		1.228	0.1962	2.84	16.64	70.5	-889	5801	12	1.01387	101.93	0.363476	1.00999
2013	[17183] FOLEY F. V.(2013) [GeoReM [7461] ]	samp. P79877A	NEW ZEALAND / SOUTH ISLAND / SOLANDER (HAUTERE) ISLAND	New Zealand	-46.5786	166.904	QUATERNARY	QUATERNARY	61.31	0.54	18.33	4.16	3.744		5.66	2.09	0.358245	2.1	4.79	0.25	1088	13.94	78.05	124.23	17.98	28.52	51.55	6.11	24.95	4.4	1.238	3.31	0.415	2.524	0.49	1.3		1.586	0.2484	3	15.3	60.7	-1011	7148	12	1.27302	124.23	0.359553	1.0203
2013	[17183] FOLEY F. V.(2013) [GeoReM [7461] ]	samp. P79783	NEW ZEALAND / SOUTH ISLAND / SOLANDER (HAUTERE) ISLAND	New Zealand	-46.5804	166.906	QUATERNARY	QUATERNARY	61.54	0.54	18.49	4.06	3.654		5.66	2.15	0.370434	2.09	4.76	0.26	1165	12.58	92.61	128.38	24.83	35.01	63.52	7.15	27.63	4.5	1.279	3.34	0.396	2.449	0.451	1.14		1.41	0.227	3.01	17.22	65.2	-1076	7421	12	1.22541	128.38	0.362691	1.02413
2013	[17183] FOLEY F. V.(2013) [GeoReM [7461] ]	samp. P79777	NEW ZEALAND / SOUTH ISLAND / SOLANDER (HAUTERE) ISLAND	New Zealand	-46.5806	166.905	QUATERNARY	QUATERNARY	61.12	0.48	18.61	3.79	3.411		6.06	2.02	0.371939	2.02	4.72	0.22	1265	12	105.42	112.31	30.24	41.15	66.55	7.29	27.33	4.25	1.263	3.05	0.382	2.257	0.441	1.14		1.361	0.2216	2.99	17.85	79.9	-968	6845	12	1.01389	112.31	0.365045	1.01714
2013	[17183] FOLEY F. V.(2013) [GeoReM [7461] ]	samp. P79821	NEW ZEALAND / SOUTH ISLAND / SOLANDER (HAUTERE) ISLAND	New Zealand	-46.5698	166.901	QUATERNARY	QUATERNARY	60.68	0.53	18.87	4.24	3.816		6.1	2.3	0.376063	1.95	4.66	0.21	1140	13.02	87.56	111.81	23.44	34.5	61.34	6.88	26.38	4.49	1.257	3.32	0.424	2.421	0.477	1.19		1.472	0.224	3.01	16.81	64	-951	6972	12	0.96818	111.81	0.370145	1.00982
2013	[17183] FOLEY F. V.(2013) [GeoReM [7461] ]	samp. P79845	NEW ZEALAND / SOUTH ISLAND / SOLANDER (HAUTERE) ISLAND	New Zealand	-46.5793	166.906	QUATERNARY	QUATERNARY	54.73	0.7	18.98	6.5	5.85001		8.64	3.57	0.378981	1.4	4.2	0.21	1156	20.61	56.09	87.4	7.96	18.4	40.85	5.68	25.76	5.29	1.69	4.4	0.595	3.81	0.745	2.06		2.313	0.355	3.2	11	27	-972	3537	12	1.09521	87.4	0.372303	0.9108
2013	[17183] FOLEY F. V.(2013) [GeoReM [7461] ]	samp. P79820	NEW ZEALAND / SOUTH ISLAND / SOLANDER (HAUTERE) ISLAND	New Zealand	-46.5698	166.901	QUATERNARY	QUATERNARY	60.87	0.59	17.33	4.84	4.356		5.83	2.74	0.386133	2.38	4.21	0.21	930.8	14.14	65.83	121.68	22.24	34.59	57.6	6.7	26.83	4.74	1.255	3.42	0.447	2.676	0.511	1.39		1.555	0.2486	3.06	16.03	62.7	-868	7396	12	1.15181	121.68	0.339937	1.01298
2013	[17183] FOLEY F. V.(2013) [GeoReM [7461] ]	samp. P79778	NEW ZEALAND / SOUTH ISLAND / SOLANDER (HAUTERE) ISLAND	New Zealand	-46.5805	166.903	QUATERNARY	QUATERNARY	62.19	0.59	17.44	4.42	3.978		5.48	2.59	0.394336	2.37	4.3	0.25	1182	11.79	100.25	116.92	30.63	40.4	64.77	7.05	26.74	4.22	1.097	2.928	0.368	2.214	0.424	1.26		1.319	0.2036	2.97	17.82	78.3	-877	4227	12	1.81912	116.92	0.342095	1.03495
2013	[17183] FOLEY F. V.(2013) [GeoReM [7461] ]	samp. P79843	NEW ZEALAND / SOUTH ISLAND / SOLANDER (HAUTERE) ISLAND	New Zealand	-46.5793	166.906	QUATERNARY	QUATERNARY	54.4	0.75	18.86	6.72	6.04801		8.21	4.02	0.399285	1.51	4.32	0.16	1276	19.65	64.94	69.02	6.36	13.7	33.95	5.14	24.45	5.55	1.724	4.57	0.615	3.72	0.726	1.9		2.155	0.323	3.13	10.29	0.1	-1091	5362	12	0.968224	69.02	0.369949	0.905309
2013	[17183] FOLEY F. V.(2013) [GeoReM [7461] ]	samp. P79815	NEW ZEALAND / SOUTH ISLAND / SOLANDER (HAUTERE) ISLAND	New Zealand	-46.5746	166.892	QUATERNARY	QUATERNARY	60.26	0.61	17.95	4.6	4.14		6.22	2.87	0.409415	2.36	4.35	0.24	1349	15.5	87.03	158.04	25.98	42.3	80.27	9.45	37.95	6.14	1.722	4.36	0.522	3.003	0.553	1.29		1.628	0.2607	3.22	17.88	49.1	-1209	9075	12	1.27799	158.04	0.352099	1.00283
2013	[17183] FOLEY F. V.(2013) [GeoReM [7461] ]	samp. P79818	NEW ZEALAND / SOUTH ISLAND / SOLANDER (HAUTERE) ISLAND	New Zealand	-46.5704	166.865	QUATERNARY	QUATERNARY	58.2	0.89	16.76	4.86	4.374		7.9	3.17	0.420201	2.68	4.32	0.58	2200	16.62	132.37	243.66	67.64	97.2	178.44	21.25	84.85	12.58	3.235	7.38	0.766	3.72	0.621	1.36		1.437	0.215	3.6	23.92	13.5	-1387	13032	12	1.27895	243.66	0.328756	0.968547
2013	[17183] FOLEY F. V.(2013) [GeoReM [7461] ]	samp. P79877B	NEW ZEALAND / SOUTH ISLAND / SOLANDER (HAUTERE) ISLAND	New Zealand	-46.5786	166.904	QUATERNARY	QUATERNARY	54.92	0.68	16.21	7.75	6.97501		7.83	5.66	0.447962	1.49	3.86	0.23	840.7	20.4	41.21	104.02	7.8	17.84	41.33	6.31	29.33	6.08	1.819	4.77	0.621	3.82	0.743	1.9		2.286	0.349	3.22	11.51	12.1	-1227	5935	12	1.53095	104.02	0.317968	0.913962
2013	[17183] FOLEY F. V.(2013) [GeoReM [7461] ]	samp. P79819	NEW ZEALAND / SOUTH ISLAND / SOLANDER (HAUTERE) ISLAND	New Zealand	-46.5704	166.865	QUATERNARY	QUATERNARY	58.2	0.84	16.93	4.57	4.113		8.03	3.56	0.463964	2.52	4.41	0.56	2269	17.5	129.66	255.11	62.85	93.2	183.29	22.03	87.92	13.01	3.34	7.78	0.803	3.95	0.652	1.31		1.483	0.2011	3.61	23.99	3.1	-1380	11661	12	2.25436	255.11	0.332091	0.968547
2013	[17304] NAKAMURA H. (2013)	samp. 302	HONSHU ARC / CENTRAL HONSHU ARC / HONSHU / HAKUSAN	Honshu Arc	35.9389	136.792	QUATERNARY	QUATERNARY	61.02	0.801	16.771				5.755	3.394		2.25	3.39	0.326	480.24	17.38	27.63	104.57	19.6	30.18	62.26	6.8	26	4.22	1.28	3.54	0.56	2.76	0.5	1.49	0.24	1.54	0.25	3.08	15.51	55.9	-801	2578	13	0.974706	104.57	0.328972	1.01548
2013	[17304] NAKAMURA H. (2013)	samp. (ID:26)	HONSHU ARC / CENTRAL HONSHU ARC / HONSHU / KYOGA-TAKE/KYOGATAKE	Honshu Arc	35.9167	137.867	QUATERNARY	QUATERNARY	69.91	0.401	16.208				3.016	0.671		2.872	4.05	0.126	471.59	16.53	28.53	180.43	19.89	31.42	61.48	6.82	26.1	4.54	0.96	3.88	0.6	2.93	0.6	1.68	0.26	1.58	0.23	3.13	15.28	45	-506	231	13	0.749914	180.43	0.317929	1.16342
2013	[17304] NAKAMURA H. (2013)	samp. 142	HONSHU ARC / CENTRAL HONSHU ARC / HONSHU / DAINICHIGATAKE	Honshu Arc	36.0011	136.838	QUATERNARY	QUATERNARY	60.98	0.883	17.781				5.005	3.315		2.158	2.84	0.277	505.49	16.85	30	164.01	16.2	25.92	53.7	5.81	22.2	3.98	1.19	3.52	0.6	2.81	0.5	1.61	0.25	1.6	0.23	3.04	14.36	47.3	-541	1557	13	2.20185	164.01	0.348784	1.01481
2013	[17304] NAKAMURA H. (2013)	samp. 294	HONSHU ARC / CENTRAL HONSHU ARC / HONSHU / EBOSHIWASHIGATAKE/EBOSHI-WASHIGATAKE	Honshu Arc	35.9403	136.971	QUATERNARY	QUATERNARY	63.06	0.749	16.97				5.33	2.093		2.408	3.08	0.253	531.84	17.07	31.16	198.96	17.28	29.37	58.05	6.53	25.1	4.6	1.43	3.99	0.63	3.2	0.6	1.75	0.28	1.7	0.26	3.15	14.4	45.1	-530	2138	13	0.672596	198.96	0.332876	1.04943
2013	[17304] NAKAMURA H. (2013)	samp. 246	HONSHU ARC / CENTRAL HONSHU ARC / HONSHU / DAINICHIYAMA	Honshu Arc	36.15	136.5	QUATERNARY	QUATERNARY	64.27	0.727	17.29				3.938	2.326		2.637	3.14	0.266	526.68	16.52	31.88	176.56	23.42	36.53	62.25	6.98	25.8	4.22	1.27	3.73	0.56	2.71	0.5	1.6	0.23	1.56	0.25	3.1	15.94	63.5	-612	5338	13	1.24804	176.56	0.339153	1.06956
2013	[17304] NAKAMURA H. (2013)	samp. 137	HONSHU ARC / CENTRAL HONSHU ARC / HONSHU / KYOGA-TAKE/KYOGATAKE	Honshu Arc	35.9167	137.867	QUATERNARY	QUATERNARY	65.22	0.597	16.772				4.181	1.369		3.072	3.69	0.217	492.25	15.32	32.13	199.55	18.22	28.6	58.2	6.36	21.5	3.79	1.05	2.65	0.42	2.47	0.5	1.48	0.23	1.57	0.26	2.99	15.03	82.2	-872	-1988	13	0.454552	199.55	0.328992	1.08537
2013	[17304] NAKAMURA H. (2013)	samp. 91	HONSHU ARC / CENTRAL HONSHU ARC / HONSHU / KYOGA-TAKE/KYOGATAKE	Honshu Arc	35.9167	137.867	QUATERNARY	QUATERNARY	64.94	0.516	17.831				4.378	0.939		2.187	4.48	0.265	569.68	17.31	32.91	187.44	15.27	28.7	59.4	7.39	26.3	4.63	1.26	3.43	0.55	3.17	0.6	1.82	0.28	1.88	0.31	3.17	14.21	62.8	-921	-993	13	0.416461	187.44	0.349765	1.08071
2013	[17304] NAKAMURA H. (2013)	samp. 95	HONSHU ARC / CENTRAL HONSHU ARC / HONSHU / KYOGA-TAKE/KYOGATAKE	Honshu Arc	35.9167	137.867	QUATERNARY	QUATERNARY	56.06	1.048	18.662				7.839	4.011		0.841	3.23	0.248	528.52	14.92	35.42	126.19	10.34	15.3	35.6	4.43	17	3.57	1.06	2.98	0.48	2.78	0.5	1.54	0.23	1.48	0.23	2.87	12	32.9	-674	-209	13	0.429451	126.19	0.366065	0.932934
2013	[17304] NAKAMURA H. (2013)	samp. (ID:195)	HONSHU ARC / CENTRAL HONSHU ARC / HONSHU / DAINICHIGATAKE	Honshu Arc	36.0011	136.838	QUATERNARY	QUATERNARY	60.38	0.802	18.74				5.407	2.359		1.641	3.61	0.331	677.94	17.97	37.73	205.57	14.51	24.38	53.06	6.02	23.9	4.36	1.34	3.79	0.61	3.04	0.6	1.8	0.3	1.68	0.27	3.12	13.49	43.7	-637	-264	13	1.34199	205.57	0.367595	1.00483
2013	[17304] NAKAMURA H. (2013)	samp. 94-1	HONSHU ARC / CENTRAL HONSHU ARC / HONSHU / KYOGA-TAKE/KYOGATAKE	Honshu Arc	35.9167	137.867	QUATERNARY	QUATERNARY	55.97	1.054	19.137				10.951	1.787		1.206	3.19	0.254	652.59	16.22	40.23	130.02	11.81	18.3	40.1	4.8	18.6	3.86	1.2	3.22	0.51	2.9	0.6	1.59	0.24	1.55	0.24	2.95	12.46	35.5	-548	-8	13	0.205694	130.02	0.375383	0.931436
2013	[17304] NAKAMURA H. (2013)	samp. 131-DAI	HONSHU ARC / CENTRAL HONSHU ARC / HONSHU / DAINICHIYAMA	Honshu Arc	36.15	136.5	QUATERNARY	QUATERNARY	60.73	0.86	17.476				5.93	3.049		2.312	3.19	0.309	679.56	16.81	40.43	147.35	20.32	31.09	60.25	6.3	23.9	3.82	1.17	3.34	0.52	2.58	0.5	1.51	0.23	1.53	0.22	3.03	15.58	61.5	-580	243	13	0.979097	147.35	0.342801	1.01065
2013	[17304] NAKAMURA H. (2013)	samp. 122	HONSHU ARC / CENTRAL HONSHU ARC / HONSHU / HAKUSAN	Honshu Arc	35.9389	136.792	QUATERNARY	QUATERNARY	61.51	0.749	17.785				5.844	2.932		1.984	3.35	0.197	640.3	14.32	44.71	132.99	13.91	21.84	44.38	4.91	19.1	3.45	1.06	3.22	0.51	2.66	0.5	1.49	0.24	1.57	0.22	2.94	13.45	49.8	-490	700	13	0.96935	132.99	0.348862	1.02363
2013	[17304] NAKAMURA H. (2013)	samp. 168	HONSHU ARC / CENTRAL HONSHU ARC / HONSHU / DAINICHIYAMA	Honshu Arc	36.15	136.5	QUATERNARY	QUATERNARY	61.73	0.823	17.376				5.776	2.943		2.39	3.08	0.231	643.22	14.02	45.88	146.05	22.97	31.47	60.03	6.19	22.6	3.63	1.14	3.33	0.5	2.59	0.5	1.38	0.21	1.37	0.2	2.99	16.03	57.6	-439	430	13	0.564745	146.05	0.34084	1.02729
2013	[17304] NAKAMURA H. (2013)	samp. 253	HONSHU ARC / CENTRAL HONSHU ARC / HONSHU / BISHAMONDAKE	Honshu Arc	35.9389	136.792	QUATERNARY	QUATERNARY	62.48	0.836	17.47				5.505	2.854		1.437	3.53	0.241	682.84	14.77	46.23	177.09	19.48	21.04	39.88	4.96	20.6	3.94	1.31	3.53	0.52	2.48	0.5	1.29	0.19	1.08	0.17	2.87	14.8	12.4	-414	4993	13	0.817828	177.09	0.342683	1.03977
2013	[17304] NAKAMURA H. (2013)	samp. 134	HONSHU ARC / CENTRAL HONSHU ARC / HONSHU / DAINICHIYAMA	Honshu Arc	36.15	136.5	QUATERNARY	QUATERNARY	64.49	0.873	16.728				4.582	1.648		2.879	3.28	0.295	638.9	13.65	46.81	156.92	28.93	40.21	73.12	7.84	28.3	4.46	1.24	3.74	0.52	2.57	0.5	1.39	0.22	1.39	0.2	3.09	17.56	57	-625	1891	13	0.795692	156.92	0.328129	1.07322
2013	[17304] NAKAMURA H. (2013)	samp. 131	HONSHU ARC / CENTRAL HONSHU ARC / HONSHU / DAINICHIYAMA	Honshu Arc	36.15	136.5	QUATERNARY	QUATERNARY	61.02	0.791	17.981				5.673	2.708		2.166	3.13	0.293	748.03	14.9	50.2	195.58	29.64	45.35	98.27	10.73	40.4	6.32	1.71	4.94	0.7	3.1	0.5	1.51	0.24	1.53	0.21	3.29	18.81	32.2	-948	3768	13	2.55921	195.58	0.352707	1.01548
2013	[17304] NAKAMURA H. (2013)	samp. 303	HONSHU ARC / CENTRAL HONSHU ARC / HONSHU / HAKUSAN	Honshu Arc	35.9389	136.792	QUATERNARY	QUATERNARY	59.4	0.837	17.434				6.528	3.601		2.025	3.43	0.367	859.84	16.93	50.79	176.74	18.14	31.74	67.21	7.51	28.9	4.94	1.44	4.17	0.63	3.1	0.6	1.71	0.28	1.75	0.26	3.2	15.25	46	-741	1027	13	0.83277	176.74	0.341977	0.988517
2013	[17304] NAKAMURA H. (2013)	samp. 125	HONSHU ARC / CENTRAL HONSHU ARC / HONSHU / HAKUSAN	Honshu Arc	35.9389	136.792	QUATERNARY	QUATERNARY	61.73	0.694	18.128				5.758	2.757		2.014	3.38	0.18	654.68	12.59	52	130.28	15.91	21.32	41.84	4.51	17.6	3.07	1.02	2.75	0.45	2.24	0.4	1.37	0.22	1.34	0.19	2.82	14.01	56.6	-506	110	13	2.47043	130.28	0.35559	1.02729
2013	[17304] NAKAMURA H. (2013)	samp. 255	HONSHU ARC / CENTRAL HONSHU ARC / HONSHU / BISHAMONDAKE	Honshu Arc	35.9389	136.792	QUATERNARY	QUATERNARY	59.56	0.913	19.61				4.979	3.229		1.587	3.14	0.373	720.31	13.5	53.36	170.6	19.86	24.43	52.49	6.37	25.4	4.36	1.38	3.65	0.54	2.49	0.5	1.4	0.2	1.23	0.19	2.98	15.77	23.5	-755	1822	13	0.872034	170.6	0.384661	0.99118
2014	[18473] KIMURA J.-I.(2014) [GeoReM [8127] ]	samp. DS-5	HONSHU ARC / SOUTHWESTERN HONSHU ARC / HONSHU / DAISEN	Honshu Arc	35.38	133.57	QUATERNARY	QUATERNARY	63.4953	0.405483	18.2508		4.30695		5.91564	1.70624	0.283749	1.34392	4.30174	0.187687	837.418	7.71	108.61	106	26.76	21.39	36.21	3.97	14.22	2.127	0.8176	2.099	0.2688	1.491	0.2847	0.782	0.1152	0.7992	0.1242	2.47	16.72	65.6	-534	3648	13	1.17568	106	0.357998	1.05667
2014	[18473] KIMURA J.-I.(2014) [GeoReM [8127] ]	samp. MI-1	HONSHU ARC / SOUTHWESTERN HONSHU ARC / HONSHU / AONOYAMA/AONO-YAMA	Honshu Arc	34	131	QUATERNARY	QUATERNARY	65.4307	0.669629	18.0841		3.99858		3.5968	1.72618	0.301528	2.06254	4.08896	0.253819	964.4	20.4336	47.2	178.482	18.61	33.1218	66.8355	8.92391	39.4818	7.23273	1.98809	5.44573	0.723	3.85155	0.750591	2.023	0.296645	1.77945	0.275055	3.36	15.41	11.5	-864	3935	13	1.21477	178.482	0.354729	1.08888
2014	[18473] KIMURA J.-I.(2014) [GeoReM [8127] ]	samp. HZ00-20	HONSHU ARC / SOUTHWESTERN HONSHU ARC / HONSHU / DAISEN	Honshu Arc	35.38	133.57	QUATERNARY	QUATERNARY	68.0024	0.309052	16.975		2.77074		3.98687	1.24813	0.310568	1.57209	4.96372	0.115274	662.069	5.048	131.15	100.9	26.07	14.18	26.57	2.87	10.36	1.79	0.6657	1.668	0.2023	1.098	0.1952	0.5155	0.0787	0.5439	0.0836	2.14	17.04	46.2	-642	7297	13	1.01521	100.9	0.332974	1.13168
2014	[18473] KIMURA J.-I.(2014) [GeoReM [8127] ]	samp. DS-3	HONSHU ARC / SOUTHWESTERN HONSHU ARC / HONSHU / DAISEN	Honshu Arc	35.38	133.57	QUATERNARY	QUATERNARY	61.8788	0.452637	18.7056		4.90112		6.12816	2.22304	0.312042	1.29167	4.14398	0.201729	922.965	9.857	93.64	95.43	32.13	26.4	40.49	4.951	17.57	2.622	0.8815	2.425	0.304	1.686	0.3183	0.8468	0.1244	0.8217	0.1221	2.6	17.67	54.6	-508	3884	13	1.48247	95.43	0.366921	1.02977
2014	[18473] KIMURA J.-I.(2014) [GeoReM [8127] ]	samp. DS-4	HONSHU ARC / SOUTHWESTERN HONSHU ARC / HONSHU / DAISEN	Honshu Arc	35.38	133.57	QUATERNARY	QUATERNARY	61.9375	0.47635	18.707		4.63373		6.13639	2.13305	0.315223	1.33779	4.35534	0.191543	794.603	7.64	104.01	99.03	22.52	17.45	32.54	3.683	13.62	2.21	0.7996	2.06	0.2771	1.575	0.2892	0.7562	0.1138	0.775	0.1171	2.44	16.06	48.3	-555	3055	13	0.586992	99.03	0.366948	1.03075
2014	[18727] HIDALGO P. J. (2014)	samp. PH2610077A7GM	CENTRAL AMERICAN VOLCANIC ARC / CENTRAL AMERICAN VOLCANIC ARC-SOUTHEASTERN SEGMENT / PANAMA / EL BARU / AGUACATE UNIT	Central American	8.8	-80.59	QUATERNARY	QUATERNARY	57.105	0.896404	17.1234	7.37496	6.63747		8.02689	3.12723	0.320258	2.81145	3.0763	0.346338	1579	13.75	114.84	149	46.94	46.47	89.03	10.67	41.93	7.32	1.97	4.8	0.57	2.59	0.45	1.17		0.99	0.15	3.14	21.1	4.2	-995	10093	12	0.667285	149	0.335884	0.950325
2014	[18727] HIDALGO P. J. (2014)	samp. PH2610077HM	CENTRAL AMERICAN VOLCANIC ARC / CENTRAL AMERICAN VOLCANIC ARC-SOUTHEASTERN SEGMENT / PANAMA / EL BARU / AGUACATE UNIT	Central American	8.8	-80.59	QUATERNARY	QUATERNARY	62.1081	0.61885	16.7394	5.53921	4.98529		6.11748	2.43482	0.328138	2.93193	3.21599	0.202901	1398	9.45	147.94	117	25.17	20.64	48.23	5.08	18.74	3.45	1.19	3.5	0.47	2.27	0.42	0.98		0.82	0.09	2.72	17.39	-11	-80	-1887	12	2.593	117	0.328352	1.03359
2014	[18473] KIMURA J.-I.(2014) [GeoReM [8127] ]	samp. DS99-2	HONSHU ARC / SOUTHWESTERN HONSHU ARC / HONSHU / DAISEN	Honshu Arc	35.38	133.57	QUATERNARY	QUATERNARY	66.1607	0.426805	18.0325		3.44545		3.80235	1.68827	0.328859	1.76206	4.50937	0.108696	637.929	5.138	124.16	110.2	16	9.496	14.67	1.796	6.773	1.352	0.6991	1.174	0.1774	1.026	0.2046	0.5736	0.0903	0.5936	0.0966	1.97	13.09	62.5	-380	6134	13	0.482686	110.2	0.353717	1.10103
2014	[18727] HIDALGO P. J. (2014)	samp. PH2610077D7GX	CENTRAL AMERICAN VOLCANIC ARC / CENTRAL AMERICAN VOLCANIC ARC-SOUTHEASTERN SEGMENT / PANAMA / EL BARU / AGUACATE UNIT	Central American	8.8	-80.59	QUATERNARY	QUATERNARY	61.7759	0.635702	16.6205	5.8136	5.23224		6.24423	2.58382	0.330578	3.04522	2.97344	0.215318	1381	11.1	124.41	126	29.53	24.51	46.57	5.52	21.34	3.95	1.19	3.04	0.39	1.88	0.36	0.93		0.83	0.12	2.72	17.99	16.5	-681	6601	12	0.603008	126	0.326021	1.02806
2014	[18473] KIMURA J.-I.(2014) [GeoReM [8127] ]	samp. 7-1	HONSHU ARC / SOUTHWESTERN HONSHU ARC / HONSHU / DAISEN	Honshu Arc	35.38	133.57	QUATERNARY	QUATERNARY	65.7895	0.421534	17.4234		3.3783		4.56662	1.75639	0.342064	2.05749	4.37593	0.160585	721	6.48	111.27	115	29.82	20.28	37.95	3.95	13.8	2.28	0.82	1.97	0.25	1.43	0.26	0.7	0.1	0.68	0.11	2.41	17.55	56.4	-618	4177	13	0.534255	115	0.34177	1.09485
2014	[18473] KIMURA J.-I.(2014) [GeoReM [8127] ]	samp. 5-1^	HONSHU ARC / SOUTHWESTERN HONSHU ARC / HONSHU / DAISEN	Honshu Arc	35.38	133.57	QUATERNARY	QUATERNARY	64.4436	0.441807	18.2848		3.69612		4.73938	1.93793	0.343967	1.83752	4.38795	0.160657	748	8.739	85.59	144.2	26.9	20.56	35.39	4.481	16.28	2.55	0.8048	2.385	0.2931	1.623	0.2934	0.7673	0.1085	0.7642	0.1132	2.51	17.23	38.7	-642	5166	13	1.4151	144.2	0.358666	1.07245
2014	[18473] KIMURA J.-I.(2014) [GeoReM [8127] ]	samp. DS-15	HONSHU ARC / SOUTHWESTERN HONSHU ARC / HONSHU / DAISEN	Honshu Arc	35.38	133.57	QUATERNARY	QUATERNARY	65.3578	0.470941	17.1778		3.71113		4.42044	1.96175	0.345812	2.10074	4.57742	0.149981	719.917	6.167	116.74	115.4	27.77	18.16	34.54	3.616	12.81	2.035	0.7066	1.878	0.2328	1.306	0.2336	0.6524	0.0942	0.654	0.1002	2.33	17.38	55.9	-638	3728	13	0.928908	115.4	0.336952	1.08766
2014	[18727] HIDALGO P. J. (2014)	samp. WVB22100723B	CENTRAL AMERICAN VOLCANIC ARC / CENTRAL AMERICAN VOLCANIC ARC-SOUTHEASTERN SEGMENT / PANAMA / EL BARU / VOLCAN UNIT	Central American	8.78	-82.63	QUATERNARY	QUATERNARY	63.5554	0.521953	17.5519	4.23703	3.81333		5.5675	2.03664	0.348145	1.94453	4.33937	0.173984	1326	6.16	215.26	93	42.04	21.02	42.47	4.21	15.26	2.63	0.88	2.14	0.29	1.19	0.25	0.58		0.5	0.06	2.35	20.17	12.5	-353	2224	12	2.6571	93	0.344291	1.05767
2014	[18473] KIMURA J.-I.(2014) [GeoReM [8127] ]	samp. 033002-1	HONSHU ARC / SOUTHWESTERN HONSHU ARC / HONSHU / DAISEN	Honshu Arc	35.38	133.57	QUATERNARY	QUATERNARY	65.0877	0.43171	17.67		3.57817		4.83916	1.93767	0.351292	1.85736	4.34721	0.180716	761	6.238	121.99	109.1	27.23	18.68	36.12	3.738	13.54	2.234	0.7752	1.978	0.247	1.402	0.2598	0.6909	0.1106	0.6861	0.0995	2.39	17.21	51	-562	1579	13	0.786334	109.1	0.346606	1.08317
2014	[18473] KIMURA J.-I.(2014) [GeoReM [8127] ]	samp. 2-2	HONSHU ARC / SOUTHWESTERN HONSHU ARC / HONSHU / DAISEN	Honshu Arc	35.38	133.57	QUATERNARY	QUATERNARY	64.7166	0.441683	17.7677		3.53246		4.8284	1.9173	0.351814	2.08796	4.45698	0.17065	788	6.602	119.36	106.6	28.68	20.72	39.28	4.092	14.67	2.405	0.8146	2.115	0.2523	1.455	0.2584	0.7079	0.1086	0.7224	0.0991	2.44	17.77	50.5	-598	2440	13	1.13513	106.6	0.348523	1.07699
2014	[18473] KIMURA J.-I.(2014) [GeoReM [8127] ]	samp. 8-1	HONSHU ARC / SOUTHWESTERN HONSHU ARC / HONSHU / DAISEN	Honshu Arc	35.38	133.57	QUATERNARY	QUATERNARY	64.0234	0.482058	18.5894		3.85948		4.64985	2.10901	0.353357	1.92823	4.13767	0.150643	815	6.73	121.1	137.7	27.36	20.52	38.17	3.96	13.62	2.29	0.8	2.02	0.25	1.51	0.27	0.72	0.1	0.75	0.11	2.43	17.34	57.6	-564	3763	13	1.09324	137.7	0.364641	1.06546
2014	[18473] KIMURA J.-I.(2014) [GeoReM [8127] ]	samp. 6-2	HONSHU ARC / SOUTHWESTERN HONSHU ARC / HONSHU / DAISEN	Honshu Arc	35.38	133.57	QUATERNARY	QUATERNARY	64.0312	0.481966	18.1942		3.68704		4.89999	2.01823	0.353749	1.96803	4.45819	0.190778	814	6.94	117.29	132.5	30.67	23.31	43.21	4.38	15.17	2.49	0.83	2.11	0.25	1.48	0.27	0.71	0.11	0.76	0.11	2.49	18.05	61.5	-652	3385	13	0.938675	132.5	0.35689	1.06559
2014	[18473] KIMURA J.-I.(2014) [GeoReM [8127] ]	samp. DS-2	HONSHU ARC / SOUTHWESTERN HONSHU ARC / HONSHU / DAISEN	Honshu Arc	35.38	133.57	QUATERNARY	QUATERNARY	58.8689	0.639923	18.7142		5.4559		6.67175	3.00784	0.35538	1.78452	4.40275	0.376485	1438.88	13.38	107.54	139.9	41.88	48.58	86.81	10.39	36.51	5.122	1.629	4.429	0.5052	2.67	0.4788	1.256	0.1868	1.16	0.1805	3.14	19.86	41.5	-828	3702	13	1.38383	139.9	0.367089	0.979679
2014	[18727] HIDALGO P. J. (2014)	samp. WVB22100726C	CENTRAL AMERICAN VOLCANIC ARC / CENTRAL AMERICAN VOLCANIC ARC-SOUTHEASTERN SEGMENT / PANAMA / EL BARU / AGUACATE UNIT	Central American	8.8	-80.59	QUATERNARY	QUATERNARY	58.738	0.635116	17.5476	6.93505	6.24156		7.26286	3.46241	0.356803	1.95657	3.14485	0.194632	1043	13.83	75.42	81	11.41	13.35	25.75	3.17	13.08	2.87	0.98	2.7	0.4	2.24	0.45	1.25		1.17	0.18	2.66	11.73	27.5	-342	4590	12	0.172813	81	0.344206	0.9775
2014	[18727] HIDALGO P. J. (2014)	samp. BO301007-41B	CENTRAL AMERICAN VOLCANIC ARC / CENTRAL AMERICAN VOLCANIC ARC-SOUTHEASTERN SEGMENT / PANAMA / EL BARU / AGUACATE UNIT	Central American	8.8	-80.59	QUATERNARY	QUATERNARY	58.2763	0.74543	17.1551	6.97437	6.27694		7.61769	3.53314	0.360154	2.39967	2.95109	0.245073	1440	10.37	138.86	97	24.59	23.11	52.82	5.86	21.84	3.96	1.29	3.69	0.51	2.47	0.45	1.1		0.94	0.11	2.84	17.33	-4.7	-279	-932	12	1.45892	97	0.336507	0.969817
2014	[18727] HIDALGO P. J. (2014)	samp. BV24100729D	CENTRAL AMERICAN VOLCANIC ARC / CENTRAL AMERICAN VOLCANIC ARC-SOUTHEASTERN SEGMENT / PANAMA / EL BARU / VOLCAN UNIT	Central American	8.78	-82.63	QUATERNARY	QUATERNARY	61.167	0.628536	16.9495	5.62539	5.06286		6.11775	2.85984	0.360968	2.07417	4.25309	0.230463	1145	8.05	142.24	131	40.01	28.81	58.04	5.88	20.25	3.4	1.06	2.89	0.38	1.44	0.28	0.71		0.72	0.11	2.64	20	34.6	-811	9917	12	3.65351	131	0.332474	1.01792
2014	[18727] HIDALGO P. J. (2014)	samp. BV101107-60B	CENTRAL AMERICAN VOLCANIC ARC / CENTRAL AMERICAN VOLCANIC ARC-SOUTHEASTERN SEGMENT / PANAMA / EL BARU / VOLCAN UNIT	Central American	8.78	-82.63	QUATERNARY	QUATERNARY	62.1319	0.601243	17.1507	5.10547	4.59493		5.84938	2.60878	0.362144	2.17059	4.05584	0.234383	1192	8.29	143.79	132	47.09	30.14	56.05	6.05	21.43	3.42	1.04	2.43	0.31	1.45	0.26	0.68		0.64	0.1	2.59	20.75	38.9	-895	7248	12	0.251381	132	0.336421	1.03398
2014	[18727] HIDALGO P. J. (2014)	samp. CP1710079A	CENTRAL AMERICAN VOLCANIC ARC / CENTRAL AMERICAN VOLCANIC ARC-SOUTHEASTERN SEGMENT / PANAMA / EL BARU / AGUACATE UNIT	Central American	8.8	-80.59	QUATERNARY	QUATERNARY	58.2557	0.675607	17.0744	7.60569	6.84513		7.12458	3.88986	0.362353	1.93469	3.12212	0.184256	1018	13.37	76.14	78	11.45	13.05	24.87	3.02	12.67	2.92	1.01	2.84	0.42	2.29	0.44	1.2		1.14	0.17	2.64	11.73	18.7	-247	7026	12	0.119869	78	0.334924	0.969474
2014	[18727] HIDALGO P. J. (2014)	samp. BO30100741C	CENTRAL AMERICAN VOLCANIC ARC / CENTRAL AMERICAN VOLCANIC ARC-SOUTHEASTERN SEGMENT / PANAMA / EL BARU / AGUACATE UNIT	Central American	8.8	-80.59	QUATERNARY	QUATERNARY	60.402	0.663198	16.8248	6.63198	5.96878		6.3871	3.39761	0.362745	1.98959	3.40782	0.193858	1187	9.86	120.39	83	20.06	15.45	29.7	3.54	14.19	2.76	0.87	2.25	0.31	1.59	0.3	0.84		0.77	0.12	2.47	15.46	26.6	-645	6522	12	0.318637	83	0.330028	1.00519
2014	[18727] HIDALGO P. J. (2014)	samp. BV24100731A	CENTRAL AMERICAN VOLCANIC ARC / CENTRAL AMERICAN VOLCANIC ARC-SOUTHEASTERN SEGMENT / PANAMA / EL BARU / VOLCAN UNIT	Central American	8.78	-82.63	QUATERNARY	QUATERNARY	62.1183	0.592381	17.1484	5.21908	4.69718		5.75018	2.67593	0.362931	1.98141	4.23859	0.183842	1149	7.23	158.92	121	42.35	26.68	51.87	4.97	17.27	2.86	0.98	2.51	0.33	1.31	0.27	0.65		0.63	0.08	2.51	20.2	30.9	-461	5265	12	3.76273	121	0.336375	1.03375
2014	[18727] HIDALGO P. J. (2014)	samp. WVB22100721	CENTRAL AMERICAN VOLCANIC ARC / CENTRAL AMERICAN VOLCANIC ARC-SOUTHEASTERN SEGMENT / PANAMA / EL BARU / AGUACATE UNIT	Central American	8.8	-80.59	QUATERNARY	QUATERNARY	62.6621	0.617909	16.2682	5.36872	4.83185		5.74352	2.75527	0.363151	3.28201	3.08955	0.131686	1169	9.21	126.93	154	24.34	19.23	47.03	5.18	19.19	3.55	1.17	3.51	0.5	2.37	0.42	1		0.79	0.08	2.72	17.45	-25.4	-28	-4273	12	2.55782	154	0.31911	1.0428
2014	[18727] HIDALGO P. J. (2014)	samp. WVB22100722	CENTRAL AMERICAN VOLCANIC ARC / CENTRAL AMERICAN VOLCANIC ARC-SOUTHEASTERN SEGMENT / PANAMA / EL BARU / AGUACATE UNIT	Central American	8.8	-80.59	QUATERNARY	QUATERNARY	62.6621	0.617909	16.2682	5.36872	4.83185		5.74352	2.75527	0.363151	3.28201	3.08955	0.131686	1169	9.21	126.93	154	24.34	19.23	47.03	5.18	19.19	3.55	1.17	3.51	0.5	2.37	0.42	1		0.79	0.08	2.72	17.45	-25.4	-28	-4273	12	2.55782	154	0.31911	1.0428
2014	[18727] HIDALGO P. J. (2014)	samp. WVB22100726A	CENTRAL AMERICAN VOLCANIC ARC / CENTRAL AMERICAN VOLCANIC ARC-SOUTHEASTERN SEGMENT / PANAMA / EL BARU / AGUACATE UNIT	Central American	8.8	-80.59	QUATERNARY	QUATERNARY	58.4349	0.655536	17.4537	7.15968	6.44372		7.19041	3.68739	0.363967	1.94612	3.17525	0.174127	1034	12.38	83.52	78	11.66	13.41	26.53	3.18	13.24	2.94	1.06	2.88	0.43	2.16	0.42	1.19		1.15	0.17	2.65	12.13	20.6	-356	7086	12	0.601183	78	0.342363	0.972456
2014	[18727] HIDALGO P. J. (2014)	samp. WVB22100726b	CENTRAL AMERICAN VOLCANIC ARC / CENTRAL AMERICAN VOLCANIC ARC-SOUTHEASTERN SEGMENT / PANAMA / EL BARU / AGUACATE UNIT	Central American	8.8	-80.59	QUATERNARY	QUATERNARY	58.3342	0.665098	17.2823	7.42863	6.68577		7.18306	3.82687	0.364025	1.85204	3.12084	0.173949	1034	13.06	79.17	77	11.7	13.22	25.25	3.05	12.81	2.93	1	2.77	0.42	2.19	0.42	1.17		1.13	0.16	2.63	12.07	18.2	-270	6847	12	0.386543	77	0.339002	0.97078
2014	[18727] HIDALGO P. J. (2014)	samp. WBV22100724	CENTRAL AMERICAN VOLCANIC ARC / CENTRAL AMERICAN VOLCANIC ARC-SOUTHEASTERN SEGMENT / PANAMA / EL BARU / AGUACATE UNIT	Central American	8.8	-80.59	QUATERNARY	QUATERNARY	58.4998	0.652263	17.3869	7.22585	6.50327		7.20546	3.73013	0.364505	1.90583	3.09825	0.173257	1045	12.49	83.67	77	12.6	12.98	25.17	2.94	12.17	2.74	0.98	2.65	0.4	2.06	0.41	1.14		1.03	0.16	2.59	12.16	22.1	-253	6498	12	0.385055	77	0.341053	0.973536
2014	[18473] KIMURA J.-I.(2014) [GeoReM [8127] ]	samp. K5090802	HONSHU ARC / SOUTHWESTERN HONSHU ARC / HONSHU / DAISEN	Honshu Arc	35.38	133.57	QUATERNARY	QUATERNARY	59.5249	0.631098	18.9998		5.18075		6.80074	2.97806	0.365011	1.6477	3.81293	0.34543	1415.95	10.47	135.24	119.1	31.37	30.57	51.64	8.2	26.98	4.165	1.342	3.32	0.379	2.169	0.3829	1.034	0.1464	0.9745	0.1462	2.87	18.59	30.7	-998	3286	13	3.04696	119.1	0.37269	0.990596
2014	[18727] HIDALGO P. J. (2014)	samp. BV24100729C	CENTRAL AMERICAN VOLCANIC ARC / CENTRAL AMERICAN VOLCANIC ARC-SOUTHEASTERN SEGMENT / PANAMA / EL BARU / VOLCAN UNIT	Central American	8.78	-82.63	QUATERNARY	QUATERNARY	61.5259	0.603395	17.2939	5.27715	4.74944		6.06463	2.74085	0.36592	1.98405	4.19309	0.224995	1208	7.5	161.07	114	44.16	27.38	53.69	5.31	18.79	3.02	1.02	2.63	0.36	1.36	0.29	0.73		0.62	0.07	2.55	20.51	17.9	-313	1081	12	4.59996	114	0.33923	1.0239
2014	[18727] HIDALGO P. J. (2014)	samp. BV24100730BH	CENTRAL AMERICAN VOLCANIC ARC / CENTRAL AMERICAN VOLCANIC ARC-SOUTHEASTERN SEGMENT / PANAMA / EL BARU / VOLCAN UNIT	Central American	8.78	-82.63	QUATERNARY	QUATERNARY	61.8178	0.594994	17.1728	5.09848	4.58864		6.00123	2.65696	0.366699	2.21584	4.12392	0.235946	1254	7.46	168.1	123	42.78	29.09	58.33	5.8	20.78	3.53	1.16	2.99	0.39	1.49	0.3	0.77		0.68	0.1	2.65	20.12	24.6	-630	7748	12	3.31833	123	0.336853	1.02875
2014	[18727] HIDALGO P. J. (2014)	samp. VB10110761D	CENTRAL AMERICAN VOLCANIC ARC / CENTRAL AMERICAN VOLCANIC ARC-SOUTHEASTERN SEGMENT / PANAMA / EL BARU / VOLCAN UNIT	Central American	8.78	-82.63	QUATERNARY	QUATERNARY	61.7871	0.609942	17.1089	5.2455	4.72096		5.93677	2.73457	0.366785	2.15513	4.09678	0.233811	1247	7.5	166.27	124	45.81	28.4	58.6	5.72	20.3	3.49	1.1	2.94	0.38	1.46	0.31	0.8		0.62	0.08	2.62	20.52	13.5	-410	2878	12	4.01152	124	0.3356	1.02824
2014	[18473] KIMURA J.-I.(2014) [GeoReM [8127] ]	samp. DS99-1	HONSHU ARC / SOUTHWESTERN HONSHU ARC / HONSHU / DAISEN	Honshu Arc	35.38	133.57	QUATERNARY	QUATERNARY	59.0907	0.634433	18.6077		5.25835		6.69221	3.05754	0.367675	1.77159	4.43902	0.368997	1434.41	11.54	124.3	127.6	38.07	41.91	80.17	9.205	33.34	4.658	1.456	3.964	0.449	2.418	0.4302	1.131	0.165	1.101	0.1646	3.04	19.74	41.6	-909	3309	13	1.17938	127.6	0.365	0.983371
2014	[18727] HIDALGO P. J. (2014)	samp. BV24100730C	CENTRAL AMERICAN VOLCANIC ARC / CENTRAL AMERICAN VOLCANIC ARC-SOUTHEASTERN SEGMENT / PANAMA / EL BARU / VOLCAN UNIT	Central American	8.78	-82.63	QUATERNARY	QUATERNARY	61.9906	0.583658	17.1309	5.00717	4.50646		5.99017	2.62134	0.367763	2.23223	4.1368	0.225271	1256	7.36	170.65	124	47.93	29.24	59.16	5.71	20.32	3.41	1.13	2.82	0.34	1.4	0.28	0.74		0.61	0.07	2.58	21.17	15.3	-434	2320	12	4.12323	124	0.336031	1.03163
2014	[18727] HIDALGO P. J. (2014)	samp. VB10110761B	CENTRAL AMERICAN VOLCANIC ARC / CENTRAL AMERICAN VOLCANIC ARC-SOUTHEASTERN SEGMENT / PANAMA / EL BARU / VOLCAN UNIT	Central American	8.78	-82.63	QUATERNARY	QUATERNARY	62.0282	0.601918	17.1088	5.06019	4.55418		5.90696	2.65252	0.368063	2.19343	4.12161	0.234646	1254	7.61	164.78	124	46.79	29.48	58.43	5.64	20.25	3.42	1.14	2.94	0.37	1.42	0.3	0.77		0.63	0.09	2.62	20.45	23	-513	6133	12	3.87806	124	0.335597	1.03225
2014	[18727] HIDALGO P. J. (2014)	samp. BV241007RIM	CENTRAL AMERICAN VOLCANIC ARC / CENTRAL AMERICAN VOLCANIC ARC-SOUTHEASTERN SEGMENT / PANAMA / EL BARU / AGUACATE UNIT	Central American	8.8	-80.59	QUATERNARY	QUATERNARY	58.268	0.651267	17.5639	7.11306	6.40176		7.24534	3.73461	0.368437	1.94362	3.1851	0.172993	1030	12.65	81.42	78	12.47	13.47	26.4	3.08	12.62	2.86	1.01	2.71	0.4	2.05	0.41	1.13		1.08	0.15	2.6	12.52	20.3	-269	5706	12	0.642014	78	0.344524	0.969679
2014	[18727] HIDALGO P. J. (2014)	samp. NB231007-1LH	CENTRAL AMERICAN VOLCANIC ARC / CENTRAL AMERICAN VOLCANIC ARC-SOUTHEASTERN SEGMENT / PANAMA / EL BARU / AGUACATE UNIT	Central American	8.8	-80.59	QUATERNARY	QUATERNARY	58.7319	0.722573	16.8838	6.71687	6.04519		7.58193	3.53145	0.368756	2.48321	3.00224	0.24425	1423	10.12	140.61	99	24.58	22.86	53.55	5.87	21.41	3.81	1.28	3.69	0.5	2.4	0.44	1.09		0.93	0.11	2.83	17.37	-2.2	-298	-1439	12	1.9474	99	0.331184	0.977399
2014	[18473] KIMURA J.-I.(2014) [GeoReM [8127] ]	samp. AO-3	HONSHU ARC / SOUTHWESTERN HONSHU ARC / HONSHU / AONOYAMA/AONO-YAMA	Honshu Arc	34	131	QUATERNARY	QUATERNARY	65.0865	0.563488	17.5758		3.57648		4.97799	2.0976	0.369681	1.51685	4.35054	0.1726	971.3	11.2209	86.56	98.8364	14.54	15.5727	32.74	3.84655	15.0082	3.03327	0.969727	2.51718	0.364618	2.14836	0.411091	1.11145	0.168127	1.07118	0.162191	2.66	13.66	33.4	-559	1480	13	0.116303	98.8364	0.344758	1.08315
2014	[18727] HIDALGO P. J. (2014)	samp. CP1710079A	CENTRAL AMERICAN VOLCANIC ARC / CENTRAL AMERICAN VOLCANIC ARC-SOUTHEASTERN SEGMENT / PANAMA / EL BARU / AGUACATE UNIT	Central American	8.8	-80.59	QUATERNARY	QUATERNARY	58.2647	0.742549	16.9871	6.97793	6.28014		7.6391	3.6924	0.370257	2.32937	3.01088	0.244126	1385	11.01	125.79	99	23.54	23.54	52.26	5.89	22.29	4.07	1.32	3.73	0.53	2.55	0.47	1.17		1	0.12	2.87	16.95	-1.7	-290	-378	12	1.12575	99	0.333211	0.969623
2014	[18727] HIDALGO P. J. (2014)	samp. PH161007-7A	CENTRAL AMERICAN VOLCANIC ARC / CENTRAL AMERICAN VOLCANIC ARC-SOUTHEASTERN SEGMENT / PANAMA / EL BARU / CUESTA UNIT	Central American	8.68	-80.62	QUATERNARY	QUATERNARY	56.229	1.02715	17.5226	7.64772	6.88295		7.34262	4.04759	0.370301	1.74921	3.87471	0.437303	1029	17.36	59.27	142	25.03	36.29	66.4	7.55	28.49	4.83	1.46	3.94	0.56	2.93	0.59	1.58		1.45	0.22	3.14	16.5	44.6	-556	2045	12	0.325891	142	0.343716	0.935747
2014	[18727] HIDALGO P. J. (2014)	samp. NB2210071G	CENTRAL AMERICAN VOLCANIC ARC / CENTRAL AMERICAN VOLCANIC ARC-SOUTHEASTERN SEGMENT / PANAMA / EL BARU / VOLCAN UNIT	Central American	8.78	-82.63	QUATERNARY	QUATERNARY	61.0797	0.606684	17.6041	5.24422	4.7198		6.25193	2.78663	0.371233	1.90231	4.20566	0.226221	1242	8.78	141.46	112	30.76	22.76	44.97	4.64	16.97	3.06	1.04	2.64	0.36	1.59	0.3	0.8		0.74	0.09	2.57	18.39	21.3	-397	3904	12	2.25049	112	0.345314	1.01647
2014	[18727] HIDALGO P. J. (2014)	samp. VB10110761EH	CENTRAL AMERICAN VOLCANIC ARC / CENTRAL AMERICAN VOLCANIC ARC-SOUTHEASTERN SEGMENT / PANAMA / EL BARU / VOLCAN UNIT	Central American	8.78	-82.63	QUATERNARY	QUATERNARY	61.7918	0.582941	17.3757	5.02148	4.51933		6.00327	2.66926	0.371319	1.97382	4.25445	0.235222	1188	7.2	165	117	42.97	27.07	53.35	5.26	18.6	3.16	1.06	2.63	0.35	1.4	0.28	0.71		0.63	0.08	2.55	20.28	22.5	-464	4546	12	2.94683	117	0.340834	1.02832
2014	[18727] HIDALGO P. J. (2014)	samp. BO30100741E	CENTRAL AMERICAN VOLCANIC ARC / CENTRAL AMERICAN VOLCANIC ARC-SOUTHEASTERN SEGMENT / PANAMA / EL BARU / AGUACATE UNIT	Central American	8.8	-80.59	QUATERNARY	QUATERNARY	58.6341	0.705449	17.2171	6.5433	5.88897		7.63726	3.51702	0.373913	2.36172	3.02628	0.255598	1402	11.87	118.11	103	27.55	25.35	48.55	5.73	22.34	4.06	1.21	3	0.41	2.02	0.38	1.02		0.92	0.14	2.78	17.53	24.9	-747	5889	12	0.334825	103	0.337722	0.975771
2014	[18727] HIDALGO P. J. (2014)	samp. BV241007RIM2	CENTRAL AMERICAN VOLCANIC ARC / CENTRAL AMERICAN VOLCANIC ARC-SOUTHEASTERN SEGMENT / PANAMA / EL BARU / AGUACATE UNIT	Central American	8.8	-80.59	QUATERNARY	QUATERNARY	59.2089	0.603025	17.4877	6.46975	5.82278		7.1852	3.48528	0.374437	1.98283	3.29109	0.183974	1325	10.25	129.27	66	16.93	14.39	29.48	3.47	14.44	2.97	1.01	2.61	0.37	1.81	0.35	0.96		0.85	0.12	2.54	14.62	10	-455	5265	12	0.639663	66	0.343031	0.985337
2014	[18727] HIDALGO P. J. (2014)	samp. NB151007-1F	CENTRAL AMERICAN VOLCANIC ARC / CENTRAL AMERICAN VOLCANIC ARC-SOUTHEASTERN SEGMENT / PANAMA / EL BARU / VOLCAN UNIT	Central American	8.78	-82.63	QUATERNARY	QUATERNARY	61.2571	0.587326	17.5992	5.13138	4.61824		6.28542	2.77177	0.375069	1.92684	4.12159	0.236991	1210	7.89	153.36	111	45.54	26.87	49.44	5.4	19.5	3.13	0.98	2.25	0.28	1.37	0.25	0.63		0.59	0.09	2.5	20.51	35.6	-835	6568	12	0.209495	111	0.345217	1.01942
2014	[18727] HIDALGO P. J. (2014)	samp. PH261007-7J	CENTRAL AMERICAN VOLCANIC ARC / CENTRAL AMERICAN VOLCANIC ARC-SOUTHEASTERN SEGMENT / PANAMA / EL BARU / CUESTA UNIT	Central American	8.68	-80.62	QUATERNARY	QUATERNARY	55.8218	1.02977	17.8426	7.65701	6.89132		7.49388	4.14967	0.375842	1.64152	3.81321	0.428222	1048	17.03	61.54	139	24.23	35.14	64.25	7.34	27.49	4.63	1.41	3.87	0.55	2.94	0.58	1.55		1.45	0.22	3.12	16.31	45.9	-542	1963	12	0.220978	139	0.349992	0.92897
2014	[18727] HIDALGO P. J. (2014)	samp. NB151007-1L	CENTRAL AMERICAN VOLCANIC ARC / CENTRAL AMERICAN VOLCANIC ARC-SOUTHEASTERN SEGMENT / PANAMA / EL BARU / VOLCAN UNIT	Central American	8.78	-82.63	QUATERNARY	QUATERNARY	61.653	0.574949	17.5873	4.89733	4.4076		6.19097	2.65914	0.376289	1.97125	4.14784	0.23614	1208	7.86	153.69	116	48.59	27.21	50.32	5.49	19.89	3.23	0.96	2.19	0.29	1.34	0.25	0.65		0.56	0.09	2.51	20.69	33.9	-840	6296	12	0.384704	116	0.344984	1.02601
2014	[18727] HIDALGO P. J. (2014)	samp. NB15100702B	CENTRAL AMERICAN VOLCANIC ARC / CENTRAL AMERICAN VOLCANIC ARC-SOUTHEASTERN SEGMENT / PANAMA / EL BARU / AGUACATE UNIT	Central American	8.8	-80.59	QUATERNARY	QUATERNARY	59.3744	0.615385	17.241	6.53333	5.88001		7.08718	3.54872	0.376373	2.02051	3.27179	0.194872	1294	9.45	136.93	69	17.07	14	30.7	3.51	14.23	3.09	1.05	2.6	0.38	1.81	0.35	0.93		0.82	0.12	2.54	14.75	6.4	-492	5600	12	0.70312	69	0.338192	0.988091
2014	[18727] HIDALGO P. J. (2014)	samp. NB03081001D	CENTRAL AMERICAN VOLCANIC ARC / CENTRAL AMERICAN VOLCANIC ARC-SOUTHEASTERN SEGMENT / PANAMA / EL BARU / CUESTA UNIT	Central American	8.68	-80.62	QUATERNARY	QUATERNARY	56.1942	1.02559	17.4756	7.59545	6.83591		7.43298	4.13282	0.376782	1.73639	3.8485	0.436637	1034	17.06	60.61	140	24.8	35.46	65	7.47	27.95	4.81	1.43	3.89	0.55	2.88	0.56	1.54		1.43	0.21	3.11	16.6	42.7	-571	2344	12	0.292513	140	0.342794	0.935166
2014	[18727] HIDALGO P. J. (2014)	samp. BV241007RIM3	CENTRAL AMERICAN VOLCANIC ARC / CENTRAL AMERICAN VOLCANIC ARC-SOUTHEASTERN SEGMENT / PANAMA / EL BARU / AGUACATE UNIT	Central American	8.8	-80.59	QUATERNARY	QUATERNARY	59.2152	0.599776	17.668	6.30273	5.67247		7.24814	3.43601	0.377232	1.97215	3.27336	0.182983	1343	9.72	138.17	66	16.08	14.15	29.96	3.52	14.15	3.06	1.08	2.74	0.38	1.78	0.35	0.93		0.88	0.12	2.55	14.61	7.6	-493	6544	12	1.20559	66	0.346567	0.985442
2014	[18727] HIDALGO P. J. (2014)	samp. NB2310071i	CENTRAL AMERICAN VOLCANIC ARC / CENTRAL AMERICAN VOLCANIC ARC-SOUTHEASTERN SEGMENT / PANAMA / EL BARU / VOLCAN UNIT	Central American	8.78	-82.63	QUATERNARY	QUATERNARY	61.0308	0.59905	17.4964	5.24685	4.72217		6.34166	2.86098	0.377281	1.90043	4.19335	0.247883	1196	7.31	163.61	107	42.36	27.11	52.07	5.34	19.29	3.26	1.06	2.78	0.36	1.4	0.29	0.72		0.64	0.09	2.58	20.01	22.9	-563	7154	12	2.98167	107	0.343201	1.01566
2014	[18727] HIDALGO P. J. (2014)	samp. NB1510071F	CENTRAL AMERICAN VOLCANIC ARC / CENTRAL AMERICAN VOLCANIC ARC-SOUTHEASTERN SEGMENT / PANAMA / EL BARU / VOLCAN UNIT	Central American	8.78	-82.63	QUATERNARY	QUATERNARY	61.3236	0.587568	17.524	5.10257	4.59231		6.19524	2.83476	0.381679	1.93794	4.18514	0.226781	1204	6.74	178.64	110	38.92	25.69	52.54	5.12	18.11	3.08	1.04	2.76	0.35	1.41	0.29	0.79		0.66	0.09	2.58	19.54	26.5	-488	4062	12	3.85203	110	0.343742	1.02053
2014	[18473] KIMURA J.-I.(2014) [GeoReM [8127] ]	samp. SE-1	HONSHU ARC / SOUTHWESTERN HONSHU ARC / HONSHU / AONOYAMA/AONO-YAMA	Honshu Arc	34	131	QUATERNARY	QUATERNARY	61.1515	0.815639	17.1886		4.89445		6.09588	3.02704	0.38213	2.14207	4.27293	0.303826	1815.6	19.7264	92.04	148.855	18.43	34.3627	66.0673	8.36109	32.24	5.65309	1.67564	4.73182	0.631255	3.55018	0.728536	1.99918	0.294236	1.86445	0.287773	3.29	15.01	39.9	-711	1057	13	0.699901	148.855	0.337163	1.01767
2014	[18727] HIDALGO P. J. (2014)	samp. NB15100701B	CENTRAL AMERICAN VOLCANIC ARC / CENTRAL AMERICAN VOLCANIC ARC-SOUTHEASTERN SEGMENT / PANAMA / EL BARU / VOLCAN UNIT	Central American	8.78	-82.63	QUATERNARY	QUATERNARY	60.0124	0.648615	17.6567	5.66251	5.09627		6.58911	3.16071	0.382793	1.76053	4.17996	0.236796	1251	7.9	158.35	100	40.6	25.17	49.24	5.16	18.8	3.29	1.03	2.73	0.37	1.48	0.28	0.69		0.62	0.08	2.55	19.99	11	-484	6689	12	2.32507	100	0.346347	0.998708
2014	[18727] HIDALGO P. J. (2014)	samp. NB1510074E	CENTRAL AMERICAN VOLCANIC ARC / CENTRAL AMERICAN VOLCANIC ARC-SOUTHEASTERN SEGMENT / PANAMA / EL BARU / VOLCAN UNIT	Central American	8.78	-82.63	QUATERNARY	QUATERNARY	60.4122	0.642792	17.0799	5.91776	5.32599		6.40751	3.367	0.387324	1.80594	4.05061	0.224467	1092	7.58	144.06	95	30.79	20.94	42.59	4.52	16.07	3.04	1.02	2.53	0.33	1.34	0.27	0.7		0.68	0.1	2.5	18.43	26.8	-721	8830	12	2.61294	95	0.335031	1.00536
2014	[18727] HIDALGO P. J. (2014)	samp. NB2310071C	CENTRAL AMERICAN VOLCANIC ARC / CENTRAL AMERICAN VOLCANIC ARC-SOUTHEASTERN SEGMENT / PANAMA / EL BARU / VOLCAN UNIT	Central American	8.78	-82.63	QUATERNARY	QUATERNARY	59.8596	0.650423	17.5098	5.82284	5.24056		6.6591	3.31406	0.3874	1.74479	4.10902	0.237456	1220	8.02	152.12	104	35.79	25.05	50.39	5.35	19.6	3.47	1.11	2.99	0.39	1.57	0.31	0.77		0.7	0.1	2.63	19.19	16.2	-605	7811	12	2.411	104	0.343464	0.996166
2014	[18727] HIDALGO P. J. (2014)	samp. NB1510072GH	CENTRAL AMERICAN VOLCANIC ARC / CENTRAL AMERICAN VOLCANIC ARC-SOUTHEASTERN SEGMENT / PANAMA / EL BARU / AGUACATE UNIT	Central American	8.8	-80.59	QUATERNARY	QUATERNARY	59.8011	0.686898	16.5368	6.42813	5.78532		6.74595	3.68054	0.388822	2.99364	2.81936	0.205044	1447	10.37	139.54	121	27.65	25.16	52.28	5.79	22.36	4.17	1.31	3.59	0.48	2.04	0.38	1.01		0.91	0.13	2.81	17.79	10.1	-625	7804	12	1.68861	121	0.324378	0.995192
2014	[18727] HIDALGO P. J. (2014)	samp. BM30100744A	CENTRAL AMERICAN VOLCANIC ARC / CENTRAL AMERICAN VOLCANIC ARC-SOUTHEASTERN SEGMENT / PANAMA / EL BARU / AGUACATE UNIT	Central American	8.8	-80.59	QUATERNARY	QUATERNARY	59.2137	0.619667	17.2897	6.34905	5.71415		7.02966	3.63673	0.388919	2.2755	3.29134	0.203169	1254	8.94	140.27	86	23.56	19.08	43.21	5	18.57	3.45	1.15	3.38	0.46	2.26	0.42	0.98		0.81	0.1	2.71	16.81	-10.6	-220	-331	12	1.30124	86	0.339147	0.985417
2014	[18727] HIDALGO P. J. (2014)	samp. NB15100702IH	CENTRAL AMERICAN VOLCANIC ARC / CENTRAL AMERICAN VOLCANIC ARC-SOUTHEASTERN SEGMENT / PANAMA / EL BARU / AGUACATE UNIT	Central American	8.8	-80.59	QUATERNARY	QUATERNARY	60.1036	0.670527	16.4584	6.30905	5.67815		6.72559	3.61678	0.389113	2.96658	2.85482	0.20319	1452	10.57	137.37	122	29.12	24.46	49.66	5.3	20.09	3.71	1.18	3.13	0.44	1.92	0.38	1		0.84	0.11	2.74	17.84	13	-393	3261	12	1.55223	122	0.32284	1.00023
2014	[18727] HIDALGO P. J. (2014)	samp. NB2310071F	CENTRAL AMERICAN VOLCANIC ARC / CENTRAL AMERICAN VOLCANIC ARC-SOUTHEASTERN SEGMENT / PANAMA / EL BARU / VOLCAN UNIT	Central American	8.78	-82.63	QUATERNARY	QUATERNARY	60.5597	0.609315	17.5669	5.38056	4.84251		6.48559	3.08789	0.389373	1.8486	4.14128	0.227202	1201	8.14	147.54	101	38.27	25.26	48.45	5.15	18.93	3.21	1.05	2.74	0.37	1.52	0.28	0.73		0.66	0.09	2.57	19.52	18.5	-542	7136	12	2.05429	101	0.344584	1.00782
2014	[18727] HIDALGO P. J. (2014)	samp. BV24100731B	CENTRAL AMERICAN VOLCANIC ARC / CENTRAL AMERICAN VOLCANIC ARC-SOUTHEASTERN SEGMENT / PANAMA / EL BARU / VOLCAN UNIT	Central American	8.78	-82.63	QUATERNARY	QUATERNARY	60.4904	0.630851	17.1449	5.80993	5.22894		6.40008	3.3374	0.389595	1.81115	4.05983	0.22385	1100	7.59	144.93	95	29.81	20.57	41.39	4.36	15.65	2.95	0.99	2.57	0.33	1.35	0.26	0.67		0.69	0.1	2.49	18.32	26.8	-713	10456	12	2.89394	95	0.336306	1.00666
2014	[18727] HIDALGO P. J. (2014)	samp. NB0308100Aj	CENTRAL AMERICAN VOLCANIC ARC / CENTRAL AMERICAN VOLCANIC ARC-SOUTHEASTERN SEGMENT / PANAMA / EL BARU / VOLCAN UNIT	Central American	8.78	-82.63	QUATERNARY	QUATERNARY	61.467	0.571312	17.4658	4.98878	4.4899		6.20282	2.86676	0.389682	1.97919	4.13181	0.234646	1180	8.08	146.04	121	36.36	26.18	49.48	5.63	20.38	3.43	1.06	2.78	0.34	1.58	0.28	0.71		0.72	0.1	2.61	19.59	25	-788	8259	12	1.15815	121	0.342601	1.02292
2014	[18727] HIDALGO P. J. (2014)	samp. PH2610077C7GX	CENTRAL AMERICAN VOLCANIC ARC / CENTRAL AMERICAN VOLCANIC ARC-SOUTHEASTERN SEGMENT / PANAMA / EL BARU / AGUACATE UNIT	Central American	8.8	-80.59	QUATERNARY	QUATERNARY	59.8983	0.701933	16.297	6.38861	5.74975		6.81587	3.67243	0.389764	3.10275	2.79756	0.223805	1526	10.49	145.47	127	32.06	28.53	65.65	6.98	25.42	4.2	1.36	3.87	0.53	2.45	0.45	1.06		0.89	0.1	2.89	18.99	-4.6	-279	-2413	12	2.07045	127	0.319675	0.996809
2014	[18727] HIDALGO P. J. (2014)	samp. NB1510072FH	CENTRAL AMERICAN VOLCANIC ARC / CENTRAL AMERICAN VOLCANIC ARC-SOUTHEASTERN SEGMENT / PANAMA / EL BARU / AGUACATE UNIT	Central American	8.8	-80.59	QUATERNARY	QUATERNARY	59.9735	0.672714	16.4203	6.29905	5.66915		6.72714	3.62858	0.390265	2.95587	3.02721	0.203853	1442	10.7	134.77	120	29.52	24.21	48.81	5.43	21.31	3.91	1.25	3.22	0.43	1.91	0.37	0.95		0.82	0.11	2.73	18.09	7.8	-526	5270	12	1.17667	120	0.322094	0.998061
2014	[18727] HIDALGO P. J. (2014)	samp. NB1510072D	CENTRAL AMERICAN VOLCANIC ARC / CENTRAL AMERICAN VOLCANIC ARC-SOUTHEASTERN SEGMENT / PANAMA / EL BARU / AGUACATE UNIT	Central American	8.8	-80.59	QUATERNARY	QUATERNARY	60.3649	0.662454	16.6735	5.96209	5.36588		6.58377	3.43457	0.390272	3.05748	2.96576	0.203832	1472	10.94	134.55	126	29.95	25.76	51.7	5.79	22.42	4.07	1.27	3.34	0.43	1.98	0.37	0.95		0.86	0.11	2.76	18.4	8.9	-563	5248	12	1.24779	126	0.327059	1.00457
2014	[18727] HIDALGO P. J. (2014)	samp. BM30100744B	CENTRAL AMERICAN VOLCANIC ARC / CENTRAL AMERICAN VOLCANIC ARC-SOUTHEASTERN SEGMENT / PANAMA / EL BARU / AGUACATE UNIT	Central American	8.8	-80.59	QUATERNARY	QUATERNARY	60.2018	0.672646	16.5512	6.32898	5.69609		6.60416	3.64859	0.390446	2.9148	2.77212	0.203832	1369	10.84	126.29	120	22.72	21.58	50.56	5.53	20.4	3.77	1.28	3.61	0.48	2.44	0.45	1.07		0.95	0.12	2.81	16.78	1.3	-341	-57	12	1.49877	120	0.32466	1.00186
2014	[18727] HIDALGO P. J. (2014)	samp. NB15100701N	CENTRAL AMERICAN VOLCANIC ARC / CENTRAL AMERICAN VOLCANIC ARC-SOUTHEASTERN SEGMENT / PANAMA / EL BARU / VOLCAN UNIT	Central American	8.78	-82.63	QUATERNARY	QUATERNARY	60.3343	0.598493	17.6556	5.46899	4.9221		6.55247	3.15757	0.390804	1.87803	4.05531	0.206377	1188	7.69	154.49	96	32.04	22.43	44.61	4.5	16.43	2.97	1	2.6	0.34	1.48	0.3	0.81		0.7	0.1	2.55	18.2	28.8	-478	5104	12	2.18287	96	0.346323	1.00407
2014	[18727] HIDALGO P. J. (2014)	samp. NB1510072E	CENTRAL AMERICAN VOLCANIC ARC / CENTRAL AMERICAN VOLCANIC ARC-SOUTHEASTERN SEGMENT / PANAMA / EL BARU / AGUACATE UNIT	Central American	8.8	-80.59	QUATERNARY	QUATERNARY	59.8319	0.686898	16.3523	6.51015	5.85914		6.80746	3.76256	0.391049	2.94238	2.79885	0.205044	1429	10.75	132.93	121	27.75	25.25	51.76	5.84	22.67	4.22	1.35	3.64	0.46	2.07	0.39	1.01		0.91	0.13	2.81	17.79	9.6	-635	7555	12	1.26214	121	0.320758	0.995704
2014	[18727] HIDALGO P. J. (2014)	samp. NB2310071E	CENTRAL AMERICAN VOLCANIC ARC / CENTRAL AMERICAN VOLCANIC ARC-SOUTHEASTERN SEGMENT / PANAMA / EL BARU / VOLCAN UNIT	Central American	8.78	-82.63	QUATERNARY	QUATERNARY	60.0206	0.627895	17.4267	5.86722	5.2805		6.54658	3.39681	0.391459	1.83222	3.97324	0.216161	1141	7.88	144.8	99	28.77	20.14	41.02	4.31	16.13	3.07	1.04	2.59	0.35	1.55	0.3	0.78		0.7	0.1	2.54	17.75	19.3	-519	6438	12	1.38537	99	0.341833	0.998845
2014	[18727] HIDALGO P. J. (2014)	samp. BV10110756A	CENTRAL AMERICAN VOLCANIC ARC / CENTRAL AMERICAN VOLCANIC ARC-SOUTHEASTERN SEGMENT / PANAMA / EL BARU / VOLCAN UNIT	Central American	8.78	-82.63	QUATERNARY	QUATERNARY	61.0782	0.643251	16.8266	5.85052	5.26547		6.16704	3.38983	0.391648	1.83786	3.99224	0.122524	1068	7.84	136.22	97	27.12	19.8	39.68	4.14	15.19	2.81	0.96	2.43	0.34	1.47	0.31	0.79		0.73	0.09	2.51	17.57	23.1	-374	2616	12	2.4194	97	0.330063	1.01645
2014	[18727] HIDALGO P. J. (2014)	samp. PH261007-7GX	CENTRAL AMERICAN VOLCANIC ARC / CENTRAL AMERICAN VOLCANIC ARC-SOUTHEASTERN SEGMENT / PANAMA / EL BARU / AGUACATE UNIT	Central American	8.8	-80.59	QUATERNARY	QUATERNARY	60.0674	0.693948	16.5425	6.43943	5.7955		6.54148	3.73508	0.391905	2.87784	2.7962	0.204102	1350	11.25	120	119	22.91	21.54	50.21	5.48	20.55	3.83	1.28	3.63	0.5	2.48	0.46	1.1		0.94	0.12	2.82	16.7	-1.7	-295	-49	12	1.25578	119	0.32449	0.999623
2014	[18727] HIDALGO P. J. (2014)	samp. NB1510072H	CENTRAL AMERICAN VOLCANIC ARC / CENTRAL AMERICAN VOLCANIC ARC-SOUTHEASTERN SEGMENT / PANAMA / EL BARU / AGUACATE UNIT	Central American	8.8	-80.59	QUATERNARY	QUATERNARY	60.28	0.674433	16.6258	6.03924	5.43532		6.64214	3.50501	0.392045	3.04517	2.89189	0.204374	1460	9.3	156.99	124	29.72	24.07	54.07	5.74	20.89	3.81	1.22	3.22	0.42	1.68	0.32	0.91		0.81	0.11	2.71	18.66	14.5	-735	5600	12	3.55346	124	0.326124	1.00316
2014	[18727] HIDALGO P. J. (2014)	samp. NB1510072A	CENTRAL AMERICAN VOLCANIC ARC / CENTRAL AMERICAN VOLCANIC ARC-SOUTHEASTERN SEGMENT / PANAMA / EL BARU / AGUACATE UNIT	Central American	8.8	-80.59	QUATERNARY	QUATERNARY	60.1266	0.663536	16.4557	6.25766	5.6319		6.73744	3.63414	0.3922	2.98081	2.8481	0.204165	1449	10	144.9	122	30.85	24.99	51.94	5.46	20.62	3.79	1.27	3.13	0.41	1.84	0.36	0.96		0.81	0.11	2.72	18.3	15.4	-520	4035	12	1.55147	122	0.322787	1.00061
2014	[18727] HIDALGO P. J. (2014)	samp. PH2610077BHX	CENTRAL AMERICAN VOLCANIC ARC / CENTRAL AMERICAN VOLCANIC ARC-SOUTHEASTERN SEGMENT / PANAMA / EL BARU / AGUACATE UNIT	Central American	8.8	-80.59	QUATERNARY	QUATERNARY	59.9511	0.683116	16.3846	6.27039	5.64336		6.84135	3.65008	0.392759	3.09951	2.80383	0.224307	1541	10.98	140.35	129	32.06	28.85	66.25	7.09	25.81	4.37	1.42	3.94	0.55	2.52	0.45	1.08		0.9	0.11	2.91	18.84	-3.3	-345	-479	12	1.69376	129	0.321392	0.997688
2014	[18727] HIDALGO P. J. (2014)	samp. NB1510071C	CENTRAL AMERICAN VOLCANIC ARC / CENTRAL AMERICAN VOLCANIC ARC-SOUTHEASTERN SEGMENT / PANAMA / EL BARU / VOLCAN UNIT	Central American	8.78	-82.63	QUATERNARY	QUATERNARY	59.6358	0.627637	17.6253	5.8648	5.27833		6.74967	3.41599	0.392899	1.76973	4.00247	0.216072	1195	7.5	159.33	93	58.17	20.94	44.98	4.45	15.92	2.97	1	2.44	0.34	1.41	0.33	0.68		0.36	0.03	2.35	21.63	-46.6	555	-11062	12	4.64203	93	0.345729	0.992441
2014	[18727] HIDALGO P. J. (2014)	samp. BM30100745A	CENTRAL AMERICAN VOLCANIC ARC / CENTRAL AMERICAN VOLCANIC ARC-SOUTHEASTERN SEGMENT / PANAMA / EL BARU / AGUACATE UNIT	Central American	8.8	-80.59	QUATERNARY	QUATERNARY	60.1324	0.661914	16.5784	6.18126	5.56314		6.73116	3.60489	0.393202	2.95316	2.86151	0.203666	1449	11.17	129.72	120	29.99	24.89	48.95	5.5	21.64	4.01	1.28	3.24	0.43	2.02	0.36	0.95		0.83	0.12	2.75	18.02	11	-587	7355	12	0.479095	120	0.325194	1.00071
2014	[18727] HIDALGO P. J. (2014)	samp. BV101107-57A	CENTRAL AMERICAN VOLCANIC ARC / CENTRAL AMERICAN VOLCANIC ARC-SOUTHEASTERN SEGMENT / PANAMA / EL BARU / VOLCAN UNIT	Central American	8.78	-82.63	QUATERNARY	QUATERNARY	60.7314	0.623148	17.2438	5.61855	5.0567		6.35407	3.27919	0.393382	1.84901	3.97385	0.234958	1100	8.44	130.33	98	34.41	21.68	39.86	4.49	16.8	2.88	0.92	2.19	0.29	1.39	0.26	0.69		0.63	0.1	2.47	18.62	34.1	-752	7134	12	0.294834	98	0.338247	1.01067
2014	[18727] HIDALGO P. J. (2014)	samp. VB10110757A	CENTRAL AMERICAN VOLCANIC ARC / CENTRAL AMERICAN VOLCANIC ARC-SOUTHEASTERN SEGMENT / PANAMA / EL BARU / VOLCAN UNIT	Central American	8.78	-82.63	QUATERNARY	QUATERNARY	60.6504	0.623786	17.2717	5.63452	5.07108		6.29921	3.29277	0.393691	1.85091	4.05972	0.224972	1101	7.59	145.06	97	32.04	21.79	43.16	4.55	16.85	2.98	1.02	2.58	0.35	1.46	0.3	0.74		0.68	0.09	2.53	18.51	19.6	-476	5074	12	2.21988	97	0.338794	1.00933
2014	[18727] HIDALGO P. J. (2014)	samp. NB15100701K	CENTRAL AMERICAN VOLCANIC ARC / CENTRAL AMERICAN VOLCANIC ARC-SOUTHEASTERN SEGMENT / PANAMA / EL BARU / VOLCAN UNIT	Central American	8.78	-82.63	QUATERNARY	QUATERNARY	60.7657	0.596953	17.3014	5.4858	4.93722		6.38123	3.2112	0.394088	1.92466	4.03458	0.205846	1142	7.71	148.12	100	34.45	22.74	46.39	4.66	16.55	2.89	0.97	2.52	0.35	1.42	0.28	0.74		0.66	0.09	2.52	18.88	25.5	-483	4677	12	2.78966	100	0.339375	1.01125
2014	[18727] HIDALGO P. J. (2014)	samp. NB03081001C	CENTRAL AMERICAN VOLCANIC ARC / CENTRAL AMERICAN VOLCANIC ARC-SOUTHEASTERN SEGMENT / PANAMA / EL BARU / VOLCAN UNIT	Central American	8.78	-82.63	QUATERNARY	QUATERNARY	60.638	0.633882	17.4522	5.72539	5.15285		6.13434	3.36366	0.394958	1.8812	3.85441	0.224926	1111	8.07	137.67	111	28.45	21.34	42.05	4.88	18.37	3.23	1.03	2.69	0.34	1.59	0.29	0.75		0.75	0.11	2.58	18.09	23.3	-800	8191	12	0.850983	111	0.342334	1.00912
2014	[18727] HIDALGO P. J. (2014)	samp. PH2610077B7IM	CENTRAL AMERICAN VOLCANIC ARC / CENTRAL AMERICAN VOLCANIC ARC-SOUTHEASTERN SEGMENT / PANAMA / EL BARU / AGUACATE UNIT	Central American	8.8	-80.59	QUATERNARY	QUATERNARY	59.8499	0.689795	16.4131	6.45161	5.80646		6.76608	3.79387	0.395182	2.84033	2.88091	0.213025	1392	11.08	125.63	119	25.26	24	54.42	6.1	23.02	4.17	1.33	3.8	0.53	2.54	0.46	1.12		0.95	0.12	2.87	17.36	-3.9	-353	628	12	1.06528	119	0.321951	0.996004
2014	[18727] HIDALGO P. J. (2014)	samp. WBV22100725CH	CENTRAL AMERICAN VOLCANIC ARC / CENTRAL AMERICAN VOLCANIC ARC-SOUTHEASTERN SEGMENT / PANAMA / EL BARU / VOLCAN UNIT	Central American	8.78	-82.63	QUATERNARY	QUATERNARY	60.6661	0.602779	17.2558	5.65999	5.094		6.36494	3.33061	0.395343	1.83899	3.98447	0.204332	1089	7.57	143.86	95	30.94	21.66	43.82	4.63	16.38	2.95	0.98	2.54	0.32	1.28	0.26	0.65		0.7	0.09	2.48	18.94	27.4	-728	8133	12	4.0563	95	0.338482	1.00959
2014	[18727] HIDALGO P. J. (2014)	samp. NB231007-01H	CENTRAL AMERICAN VOLCANIC ARC / CENTRAL AMERICAN VOLCANIC ARC-SOUTHEASTERN SEGMENT / PANAMA / EL BARU / VOLCAN UNIT	Central American	8.78	-82.63	QUATERNARY	QUATERNARY	58.5238	0.697078	17.7037	6.31471	5.68325		7.12455	3.72117	0.395683	1.65044	3.91594	0.246028	1236	9.8	126.12	95	33.92	24.42	45.79	5.32	20.35	3.5	1.07	2.65	0.34	1.66	0.31	0.82		0.72	0.11	2.63	18.68	24.7	-749	6195	12	0.409984	95	0.347268	0.973936
2014	[18727] HIDALGO P. J. (2014)	samp. NB2310071B	CENTRAL AMERICAN VOLCANIC ARC / CENTRAL AMERICAN VOLCANIC ARC-SOUTHEASTERN SEGMENT / PANAMA / EL BARU / VOLCAN UNIT	Central American	8.78	-82.63	QUATERNARY	QUATERNARY	59.6265	0.70161	17.2513	5.98432	5.38589		6.77879	3.58027	0.399309	1.81593	3.90012	0.257945	1115	9.17	121.59	108	30.77	24.31	49.79	5.33	19.99	3.59	1.11	3.13	0.41	1.73	0.32	0.87		0.79	0.11	2.68	18.43	16.5	-614	7271	12	2.21473	108	0.338394	0.992287
2014	[18727] HIDALGO P. J. (2014)	samp. NB1510072EH	CENTRAL AMERICAN VOLCANIC ARC / CENTRAL AMERICAN VOLCANIC ARC-SOUTHEASTERN SEGMENT / PANAMA / EL BARU / AGUACATE UNIT	Central American	8.8	-80.59	QUATERNARY	QUATERNARY	59.6183	0.704153	16.369	6.48025	5.83223		6.89866	3.91877	0.401884	2.88805	2.81661	0.204102	1421	11.11	127.9	119	26.58	24.19	48.74	5.47	21.53	4.05	1.29	3.39	0.44	1.98	0.37	1		0.91	0.12	2.77	17.68	10.5	-592	6630	12	1.55777	119	0.321087	0.992151
2014	[18727] HIDALGO P. J. (2014)	samp. NB1510072JH	CENTRAL AMERICAN VOLCANIC ARC / CENTRAL AMERICAN VOLCANIC ARC-SOUTHEASTERN SEGMENT / PANAMA / EL BARU / AGUACATE UNIT	Central American	8.8	-80.59	QUATERNARY	QUATERNARY	57.6257	0.737478	16.962	7.00604	6.30545		7.79474	4.32244	0.406708	2.57093	2.66312	0.215098	1406	10.89	129.11	101	23.73	22.54	45.85	5.39	21.36	4.17	1.32	3.55	0.47	2.1	0.39	1.01		0.95	0.13	2.79	17.03	4.9	-620	8224	12	1.18398	101	0.332719	0.95899
2014	[18727] HIDALGO P. J. (2014)	samp. WBV22100725B	CENTRAL AMERICAN VOLCANIC ARC / CENTRAL AMERICAN VOLCANIC ARC-SOUTHEASTERN SEGMENT / PANAMA / EL BARU / VOLCAN UNIT	Central American	8.78	-82.63	QUATERNARY	QUATERNARY	62.1371	0.550066	17.1947	4.81817	4.33636		6.05073	2.98462	0.40768	1.38535	4.62463	0.183355	964	6.3	153.02	78	25.52	15.57	33.66	3.52	13.33	2.64	0.88	2.19	0.32	1.28	0.28	0.68		0.61	0.08	2.37	17.31	10.6	-442	4206	12	2.96411	78	0.337283	1.03407
2014	[18727] HIDALGO P. J. (2014)	samp. NB15100701D	CENTRAL AMERICAN VOLCANIC ARC / CENTRAL AMERICAN VOLCANIC ARC-SOUTHEASTERN SEGMENT / PANAMA / EL BARU / VOLCAN UNIT	Central American	8.78	-82.63	QUATERNARY	QUATERNARY	58.6157	0.690081	17.4168	6.31373	5.68236		7.12741	3.91389	0.407856	1.65826	3.93449	0.226594	1174	9.12	128.73	87	31.34	21.94	43.47	4.74	18.19	3.3	1.09	2.73	0.38	1.65	0.31	0.83		0.7	0.1	2.59	18.18	13.9	-515	5971	12	1.16469	87	0.34164	0.975465
2014	[18727] HIDALGO P. J. (2014)	samp. NB15100701A	CENTRAL AMERICAN VOLCANIC ARC / CENTRAL AMERICAN VOLCANIC ARC-SOUTHEASTERN SEGMENT / PANAMA / EL BARU / VOLCAN UNIT	Central American	8.78	-82.63	QUATERNARY	QUATERNARY	60.827	0.598061	17.2716	5.35162	4.81646		6.38276	3.33058	0.408809	1.88699	4.04207	0.216539	1100	8.39	131.11	98	31.4	21.98	43.9	4.72	17.74	3.19	1.04	2.83	0.39	1.63	0.31	0.86		0.7	0.1	2.6	18.09	14.4	-451	5585	12	2.13309	98	0.338792	1.01226
2014	[18727] HIDALGO P. J. (2014)	samp. BO30100741B	CENTRAL AMERICAN VOLCANIC ARC / CENTRAL AMERICAN VOLCANIC ARC-SOUTHEASTERN SEGMENT / PANAMA / EL BARU / AGUACATE UNIT	Central American	8.8	-80.59	QUATERNARY	QUATERNARY	59.1378	0.617284	17.0816	6.26391	5.63753		7.13418	3.90609	0.409288	2.26675	3.28881	0.212508	1268	8.76	144.75	84	24.13	18.58	44.73	4.93	18.1	3.27	1.13	3.37	0.44	2.16	0.41	0.95		0.77	0.08	2.67	17.35	-17.7	-79	-4383	12	2.69811	84	0.335064	0.984154
2014	[18727] HIDALGO P. J. (2014)	samp. NB151007-01J	CENTRAL AMERICAN VOLCANIC ARC / CENTRAL AMERICAN VOLCANIC ARC-SOUTHEASTERN SEGMENT / PANAMA / EL BARU / VOLCAN UNIT	Central American	8.78	-82.63	QUATERNARY	QUATERNARY	60.109	0.616713	17.3605	5.62237	5.06013		6.72217	3.51526	0.409924	1.79875	3.93668	0.226128	1116	8.23	135.6	93	35.4	21.24	41.34	4.48	16.94	2.88	0.92	2.16	0.28	1.41	0.26	0.72		0.6	0.09	2.46	18.86	29.1	-675	3648	12	0.521007	93	0.340535	1.00032
2014	[18727] HIDALGO P. J. (2014)	samp. NB231007-1M	CENTRAL AMERICAN VOLCANIC ARC / CENTRAL AMERICAN VOLCANIC ARC-SOUTHEASTERN SEGMENT / PANAMA / EL BARU / VOLCAN UNIT	Central American	8.78	-82.63	QUATERNARY	QUATERNARY	59.784	0.641744	17.2863	5.87756	5.28981		6.7434	3.68748	0.410757	1.81318	3.85046	0.224101	1096	8.86	123.7	90	33.91	21.7	39.74	4.53	17.13	3	0.93	2.29	0.31	1.51	0.27	0.73		0.64	0.1	2.5	18.44	27.6	-667	6952	12	0.22333	90	0.339081	0.994908
2014	[18727] HIDALGO P. J. (2014)	samp. NB15100701M	CENTRAL AMERICAN VOLCANIC ARC / CENTRAL AMERICAN VOLCANIC ARC-SOUTHEASTERN SEGMENT / PANAMA / EL BARU / VOLCAN UNIT	Central American	8.78	-82.63	QUATERNARY	QUATERNARY	59.8107	0.617347	17.5018	5.64873	5.08386		6.80111	3.56004	0.411855	1.73886	4.01276	0.216072	1158	7.71	150.19	89	35.15	21.44	43.51	4.4	16.17	2.75	0.97	2.4	0.32	1.38	0.28	0.7		0.61	0.08	2.47	18.98	20.7	-424	2934	12	2.04839	89	0.343307	0.995352
2014	[18727] HIDALGO P. J. (2014)	samp. NB15100701H	CENTRAL AMERICAN VOLCANIC ARC / CENTRAL AMERICAN VOLCANIC ARC-SOUTHEASTERN SEGMENT / PANAMA / EL BARU / VOLCAN UNIT	Central American	8.78	-82.63	QUATERNARY	QUATERNARY	59.1153	0.639307	17.6119	5.91875	5.32688		7.03238	3.76366	0.41402	1.67045	3.94927	0.206228	1165	8.16	142.77	83	29.64	20.45	40.9	4.33	16.38	2.92	0.98	2.5	0.35	1.52	0.31	0.8		0.69	0.09	2.53	17.93	18	-399	2878	12	1.69809	83	0.345466	0.983779
2014	[18727] HIDALGO P. J. (2014)	samp. NB231007-1K	CENTRAL AMERICAN VOLCANIC ARC / CENTRAL AMERICAN VOLCANIC ARC-SOUTHEASTERN SEGMENT / PANAMA / EL BARU / VOLCAN UNIT	Central American	8.78	-82.63	QUATERNARY	QUATERNARY	60.3664	0.620865	17.0382	5.58779	5.02901		6.64631	3.63359	0.419457	1.89313	3.88804	0.234097	1075	9.34	115.1	106	32.6	23.47	43.23	4.87	18.29	3.13	0.98	2.36	0.31	1.55	0.29	0.81		0.72	0.11	2.57	18.33	36.6	-724	5159	12	0.483164	106	0.334213	1.0046
2014	[18727] HIDALGO P. J. (2014)	samp. PH2610077C7HX	CENTRAL AMERICAN VOLCANIC ARC / CENTRAL AMERICAN VOLCANIC ARC-SOUTHEASTERN SEGMENT / PANAMA / EL BARU / AGUACATE UNIT	Central American	8.8	-80.59	QUATERNARY	QUATERNARY	60.4942	0.650803	16.3311	5.76571	5.18914		6.60972	3.8133	0.423585	3.15233	2.88794	0.213545	1435	8.65	165.9	129	34.68	24.62	58.59	6.11	22.26	3.79	1.24	3.61	0.48	2.18	0.4	0.91		0.71	0.07	2.74	19.59	-22.6	-74	-4257	12	3.07593	129	0.320343	1.00673
2014	[18727] HIDALGO P. J. (2014)	samp. PH2610077A7IM	CENTRAL AMERICAN VOLCANIC ARC / CENTRAL AMERICAN VOLCANIC ARC-SOUTHEASTERN SEGMENT / PANAMA / EL BARU / AGUACATE UNIT	Central American	8.8	-80.59	QUATERNARY	QUATERNARY	60.5146	0.648298	16.5823	5.71313	5.14182		6.48298	3.78849	0.424228	3.11994	2.87682	0.192464	1373	8.35	164.43	125	31.23	22.8	53.29	5.64	20.32	3.45	1.19	3.51	0.48	2.17	0.4	0.9		0.73	0.07	2.7	18.92	-20.9	14	-4552	12	3.87288	125	0.32527	1.00707
2014	[18727] HIDALGO P. J. (2014)	samp. PH2610077BHS	CENTRAL AMERICAN VOLCANIC ARC / CENTRAL AMERICAN VOLCANIC ARC-SOUTHEASTERN SEGMENT / PANAMA / EL BARU / AGUACATE UNIT	Central American	8.8	-80.59	QUATERNARY	QUATERNARY	60.4392	0.637587	16.3951	5.75853	5.18268		6.69973	3.84576	0.425961	3.08673	2.86408	0.192288	1394	8.22	169.59	123	32.01	22.73	52.53	5.58	20.35	3.42	1.19	3.49	0.47	2.21	0.41	0.89		0.71	0.07	2.7	18.9	-21.6	40	-4740	12	3.19415	123	0.321599	1.00581
2014	[18727] HIDALGO P. J. (2014)	samp. PH2610077A7GX	CENTRAL AMERICAN VOLCANIC ARC / CENTRAL AMERICAN VOLCANIC ARC-SOUTHEASTERN SEGMENT / PANAMA / EL BARU / AGUACATE UNIT	Central American	8.8	-80.59	QUATERNARY	QUATERNARY	60.3674	0.659698	16.4417	5.80534	5.22481		6.57668	3.93789	0.429774	3.05491	2.88237	0.192835	1349	9.26	145.68	124	28.98	23.76	51.49	5.76	21.63	4.22	1.28	3.68	0.5	2.37	0.44	1.04		0.82	0.1	2.8	17.93	-13.4	-215	1453	12	0.852233	124	0.322513	1.00462
2014	[18727] HIDALGO P. J. (2014)	samp. NB1510073E	CENTRAL AMERICAN VOLCANIC ARC / CENTRAL AMERICAN VOLCANIC ARC-SOUTHEASTERN SEGMENT / PANAMA / EL BARU / BAMBITO UNIT	Central American	8.83	-82.61	QUATERNARY	QUATERNARY	56.9253	0.735971	16.8558	6.97128	6.27416		7.94235	4.88603	0.437809	1.96259	3.32209	0.286211	1341	10.11	132.64	122	34.2	32.49	64.49	7.11	25.91	4.4	1.3	3.48	0.45	1.79	0.35	0.9		0.95	0.14	2.85	19.43	31.2	-961	9926	12	2.26685	122	0.330635	0.947334
2014	[18727] HIDALGO P. J. (2014)	samp. NB03081001B	CENTRAL AMERICAN VOLCANIC ARC / CENTRAL AMERICAN VOLCANIC ARC-SOUTHEASTERN SEGMENT / PANAMA / EL BARU / CUESTA UNIT	Central American	8.68	-80.62	QUATERNARY	QUATERNARY	54.5612	0.761885	17.7469	7.6087	6.84783		9.35595	5.35351	0.438764	1.62536	2.66152	0.203169	1136	13.36	85.03	90	14.62	19.01	37.12	4.63	18.09	3.6	1.2	3.09	0.44	2.41	0.47	1.32		1.3	0.2	2.84	13.67	35.2	-628	4300	12	0.202749	90	0.348114	0.907991
2014	[18727] HIDALGO P. J. (2014)	samp. NB1510073F	CENTRAL AMERICAN VOLCANIC ARC / CENTRAL AMERICAN VOLCANIC ARC-SOUTHEASTERN SEGMENT / PANAMA / EL BARU / BAMBITO UNIT	Central American	8.83	-82.61	QUATERNARY	QUATERNARY	56.7201	0.744974	16.7568	7.06195	6.35576		8.03143	4.99031	0.439827	1.94918	3.33708	0.285743	1329	11.17	118.98	121	31.45	32.08	61.59	6.81	25.72	4.41	1.34	3.73	0.48	2.06	0.39	1.08		1.02	0.14	2.9	18.6	25.4	-696	7216	12	2.04934	121	0.328694	0.943919
2014	[18727] HIDALGO P. J. (2014)	samp. NB1510073D	CENTRAL AMERICAN VOLCANIC ARC / CENTRAL AMERICAN VOLCANIC ARC-SOUTHEASTERN SEGMENT / PANAMA / EL BARU / BAMBITO UNIT	Central American	8.83	-82.61	QUATERNARY	QUATERNARY	56.4408	0.742367	16.7189	7.13091	6.41782		8.15558	5.14429	0.444927	1.93434	3.33542	0.282309	1302	10.87	119.78	120	32.97	31.32	60.51	6.59	24.48	4.18	1.26	3.4	0.43	1.9	0.37	0.99		0.95	0.13	2.84	18.92	29.3	-727	6315	12	1.69827	120	0.327951	0.939271
2014	[18727] HIDALGO P. J. (2014)	samp. NB15100704B	CENTRAL AMERICAN VOLCANIC ARC / CENTRAL AMERICAN VOLCANIC ARC-SOUTHEASTERN SEGMENT / PANAMA / EL BARU / BAMBITO UNIT	Central American	8.83	-82.61	QUATERNARY	QUATERNARY	56.7656	0.734169	16.6106	6.995	6.29551		8.12685	5.06781	0.44598	1.93739	3.35475	0.28551	1335	9.75	136.92	120	34.75	30.23	62.29	6.78	24.23	4.11	1.24	3.34	0.42	1.73	0.34	0.86		0.87	0.12	2.79	19.6	25.5	-855	7205	12	2.42911	120	0.325826	0.944676
2014	[18727] HIDALGO P. J. (2014)	samp. NB1510074A	CENTRAL AMERICAN VOLCANIC ARC / CENTRAL AMERICAN VOLCANIC ARC-SOUTHEASTERN SEGMENT / PANAMA / EL BARU / BAMBITO UNIT	Central American	8.83	-82.61	QUATERNARY	QUATERNARY	56.7364	0.734319	16.6956	6.93524	6.24172		8.09791	5.03825	0.446654	1.91739	3.44722	0.285569	1337	9.63	138.84	119	33.35	30.35	64.26	6.82	24.19	4.18	1.26	3.32	0.44	1.71	0.34	0.86		0.91	0.13	2.81	19.45	29.8	-928	8384	12	3.01675	119	0.327492	0.94419
2014	[18727] HIDALGO P. J. (2014)	samp. NB1510074C	CENTRAL AMERICAN VOLCANIC ARC / CENTRAL AMERICAN VOLCANIC ARC-SOUTHEASTERN SEGMENT / PANAMA / EL BARU / BAMBITO UNIT	Central American	8.83	-82.61	QUATERNARY	QUATERNARY	56.6978	0.727683	16.6957	6.96936	6.27243		8.17874	5.06303	0.446654	1.92682	3.34119	0.276724	1334	11.32	117.84	119	33.46	33.13	61.02	6.76	25.55	4.37	1.3	3.62	0.47	2.08	0.4	1.08		0.99	0.14	2.9	18.66	27.6	-635	6959	12	1.3588	119	0.327495	0.943547
2014	[18727] HIDALGO P. J. (2014)	samp. PH161007-8A	CENTRAL AMERICAN VOLCANIC ARC / CENTRAL AMERICAN VOLCANIC ARC-SOUTHEASTERN SEGMENT / PANAMA / EL BARU / CUESTA UNIT	Central American	8.68	-80.62	QUATERNARY	QUATERNARY	52.6412	0.780696	17.662	8.28348	7.45514		9.80432	6.18473	0.45343	1.65264	2.65639	0.202778	1136	13.95	81.43	83	14.83	18.68	36.91	4.52	17.82	3.61	1.13	3.02	0.44	2.38	0.47	1.33		1.26	0.19	2.82	13.72	32.4	-575	3460	12	0.290216	83	0.346449	0.876039
2014	[18727] HIDALGO P. J. (2014)	samp. CP26100738B	CENTRAL AMERICAN VOLCANIC ARC / CENTRAL AMERICAN VOLCANIC ARC-SOUTHEASTERN SEGMENT / PANAMA / EL BARU / CUESTA UNIT	Central American	8.68	-80.62	QUATERNARY	QUATERNARY	54.0433	0.976503	16.9261	7.5679	6.81111		8.75801	5.6861	0.454989	2.90916	2.63452	0.386532	1639	13.46	121.77	205	41.32	48.35	100.94	11	39.42	6.3	1.83	4.85	0.7	2.96	0.52	1.34		1.17	0.15	3.21	20.43	11.7	-618	2397	12	1.47171	205	0.332014	0.899373
2014	[18727] HIDALGO P. J. (2014)	samp. NB03081001F	CENTRAL AMERICAN VOLCANIC ARC / CENTRAL AMERICAN VOLCANIC ARC-SOUTHEASTERN SEGMENT / PANAMA / EL BARU / CUESTA UNIT	Central American	8.68	-80.62	QUATERNARY	QUATERNARY	52.6497	0.781726	17.4213	8.37563	7.53808		9.93909	6.30457	0.455445	1.58376	2.61929	0.192893	1123	13.45	83.49	82	14.67	18.93	37.05	4.6	18.2	3.63	1.13	3.05	0.43	2.33	0.45	1.28		1.29	0.19	2.82	13.9	34	-662	4607	12	0.385244	82	0.341729	0.876181
2014	[18727] HIDALGO P. J. (2014)	samp. NB03081001E	CENTRAL AMERICAN VOLCANIC ARC / CENTRAL AMERICAN VOLCANIC ARC-SOUTHEASTERN SEGMENT / PANAMA / EL BARU / CUESTA UNIT	Central American	8.68	-80.62	QUATERNARY	QUATERNARY	52.5324	0.779984	17.5547	8.37723	7.53951		9.87642	6.33104	0.456437	1.61062	2.60332	0.202593	1130	14.04	80.48	82	13.7	18.49	36.67	4.57	18.34	3.7	1.15	3.13	0.46	2.51	0.5	1.35		1.35	0.2	2.85	13.38	30.8	-588	3662	12	0.214384	82	0.344345	0.874229
2014	[18727] HIDALGO P. J. (2014)	samp. CP17100714G	CENTRAL AMERICAN VOLCANIC ARC / CENTRAL AMERICAN VOLCANIC ARC-SOUTHEASTERN SEGMENT / PANAMA / EL BARU / BAMBITO UNIT	Central American	8.83	-82.61	QUATERNARY	QUATERNARY	55.2795	0.794216	16.7295	7.78943	7.01049		8.4411	6.01772	0.461899	1.23205	3.41106	0.183281	899	10.34	86.94	67	15.55	15.24	33.43	4.02	16.06	3.06	1	3.29	0.44	2.36	0.45	1.11		0.98	0.12	2.69	14.31	-2.8	-186	-312	12	1.31016	67	0.328157	0.919945
2014	[18473] KIMURA J.-I.(2014) [GeoReM [8127] ]	samp. TA-2	HONSHU ARC / SOUTHWESTERN HONSHU ARC / HONSHU / AONOYAMA/AONO-YAMA	Honshu Arc	34	131	QUATERNARY	QUATERNARY	62.0443	0.619617	17.7314		3.94076		5.42165	3.38724	0.462232	2.2616	4.27536	0.23752	1639.2	10.4164	157.37	131.436	40.84	35.4264	61.2164	8.29845	31.2155	5.06545	1.62991	4.15773	0.476436	2.22555	0.409645	1.11309	0.149509	0.8675	0.132064	2.95	19.6	8.3	-756	6721	13	2.1322	131.436	0.34781	1.03252
2014	[18727] HIDALGO P. J. (2014)	samp. NB03081001G	CENTRAL AMERICAN VOLCANIC ARC / CENTRAL AMERICAN VOLCANIC ARC-SOUTHEASTERN SEGMENT / PANAMA / EL BARU / CUESTA UNIT	Central American	8.68	-80.62	QUATERNARY	QUATERNARY	52.6428	0.784194	17.2319	8.35116	7.51605		10.0825	6.46705	0.462491	1.52765	2.57664	0.203687	1104	14.1	78.3	81	14.13	17.94	35.5	4.35	17.23	3.46	1.08	2.96	0.44	2.36	0.46	1.28		1.27	0.19	2.8	13.51	33	-576	3971	12	0.162494	81	0.338013	0.876066
2014	[18727] HIDALGO P. J. (2014)	samp. PH1610078D	CENTRAL AMERICAN VOLCANIC ARC / CENTRAL AMERICAN VOLCANIC ARC-SOUTHEASTERN SEGMENT / PANAMA / EL BARU / CUESTA UNIT	Central American	8.68	-80.62	QUATERNARY	QUATERNARY	53.1932	0.964565	17.1083	8.19373	7.37436		9.0466	6.35598	0.462915	1.26916	3.38105	0.365519	1060	14.44	73.41	99	22.85	30.16	58.93	6.68	24.91	4.27	1.34	4.01	0.57	2.93	0.54	1.44		1.32	0.18	3.04	16.22	28	-369	1334	12	0.660871	99	0.335589	0.885226
2014	[18727] HIDALGO P. J. (2014)	samp. PH161007-7D	CENTRAL AMERICAN VOLCANIC ARC / CENTRAL AMERICAN VOLCANIC ARC-SOUTHEASTERN SEGMENT / PANAMA / EL BARU / CUESTA UNIT	Central American	8.68	-80.62	QUATERNARY	QUATERNARY	53.0054	0.969487	17.3079	8.19471	7.37525		9.05194	6.41902	0.46534	1.24503	3.30646	0.37759	1058	14.27	74.14	102	24.77	29.72	55.4	6.39	24	4.2	1.3	3.35	0.47	2.49	0.5	1.34		1.2	0.18	2.96	16.51	39.6	-559	1706	12	0.347109	102	0.339504	0.8821
2014	[18727] HIDALGO P. J. (2014)	samp. PH2610077E	CENTRAL AMERICAN VOLCANIC ARC / CENTRAL AMERICAN VOLCANIC ARC-SOUTHEASTERN SEGMENT / PANAMA / EL BARU / CUESTA UNIT	Central American	8.68	-80.62	QUATERNARY	QUATERNARY	53.0989	0.967449	17.2629	8.18301	7.36472		8.98922	6.45974	0.467269	1.22947	3.31553	0.372871	1061	14.46	73.37	100	22.32	29.46	58.54	6.55	24.61	4.29	1.35	3.99	0.56	2.95	0.54	1.44		1.32	0.18	3.04	16.12	27.4	-374	1255	12	0.521365	100	0.338622	0.883656
2014	[18727] HIDALGO P. J. (2014)	samp. CP17100714A	CENTRAL AMERICAN VOLCANIC ARC / CENTRAL AMERICAN VOLCANIC ARC-SOUTHEASTERN SEGMENT / PANAMA / EL BARU / BAMBITO UNIT	Central American	8.83	-82.61	QUATERNARY	QUATERNARY	57.7534	0.683829	16.7136	6.45615	5.81054		7.49195	5.15889	0.470297	1.61907	3.75101	0.261464	1018	9.17	111.01	93	26.29	22.61	50.25	5.41	19.51	3.23	1.08	3.47	0.46	2.24	0.42	1.01		0.86	0.1	2.75	17.45	3.3	-145	-2507	12	2.74253	93	0.327846	0.961115
2014	[18727] HIDALGO P. J. (2014)	samp. PH161007-7C	CENTRAL AMERICAN VOLCANIC ARC / CENTRAL AMERICAN VOLCANIC ARC-SOUTHEASTERN SEGMENT / PANAMA / EL BARU / CUESTA UNIT	Central American	8.68	-80.62	QUATERNARY	QUATERNARY	53.1237	0.742776	17.4807	7.89581	7.10623		9.34066	6.35938	0.472268	1.7501	2.94058	0.2442	1243	11.66	106.6	80	25.52	23.73	45.92	5.42	21.21	3.65	1.14	2.76	0.37	1.92	0.37	1		0.93	0.15	2.74	17.04	36.1	-843	4805	12	0.325702	80	0.342893	0.884069
2014	[18727] HIDALGO P. J. (2014)	samp. PH1610078C	CENTRAL AMERICAN VOLCANIC ARC / CENTRAL AMERICAN VOLCANIC ARC-SOUTHEASTERN SEGMENT / PANAMA / EL BARU / CUESTA UNIT	Central American	8.68	-80.62	QUATERNARY	QUATERNARY	51.9247	1.00865	17.3631	8.70729	7.83657		9.13956	7.01935	0.472495	1.06011	3.29354	0.349938	1048	13.48	77.74	100	23.53	28.24	57.06	6.26	23.09	4.06	1.32	3.87	0.54	2.8	0.52	1.35		1.2	0.17	2.99	16.27	25.7	-333	1436	12	0.648096	100	0.340587	0.864115
2014	[18727] HIDALGO P. J. (2014)	samp. CP17100714F	CENTRAL AMERICAN VOLCANIC ARC / CENTRAL AMERICAN VOLCANIC ARC-SOUTHEASTERN SEGMENT / PANAMA / EL BARU / BAMBITO UNIT	Central American	8.83	-82.61	QUATERNARY	QUATERNARY	56.3771	0.742474	16.548	7.21115	6.49004		7.93328	5.83808	0.473558	1.3629	3.62083	0.254272	998	9.68	103.1	69	20.98	18.88	42.41	4.79	17.96	3.23	1.06	3.38	0.45	2.27	0.44	1.04		0.9	0.11	2.72	16.1	0	-201	-1270	12	1.79371	69	0.324598	0.938212
2014	[18727] HIDALGO P. J. (2014)	samp. NB1510073A	CENTRAL AMERICAN VOLCANIC ARC / CENTRAL AMERICAN VOLCANIC ARC-SOUTHEASTERN SEGMENT / PANAMA / EL BARU / BAMBITO UNIT	Central American	8.83	-82.61	QUATERNARY	QUATERNARY	56.5435	0.714577	16.3944	7.02327	6.32095		7.88077	6.14537	0.492957	1.30666	3.65455	0.224581	957	10.39	92.11	68	21.06	18.74	36.9	4.3	17.01	3.18	1	2.8	0.39	1.83	0.36	0.96		0.89	0.12	2.63	16.03	18	-495	4537	12	1.02323	68	0.321586	0.94098
2014	[18727] HIDALGO P. J. (2014)	samp. NB1510073B	CENTRAL AMERICAN VOLCANIC ARC / CENTRAL AMERICAN VOLCANIC ARC-SOUTHEASTERN SEGMENT / PANAMA / EL BARU / BAMBITO UNIT	Central American	8.83	-82.61	QUATERNARY	QUATERNARY	56.9171	0.703436	16.5154	6.76929	6.09237		7.75818	5.92313	0.492957	1.33551	3.74146	0.224284	970	8.87	109.36	70	22.21	18.21	38.77	4.29	16.03	2.96	0.97	2.58	0.35	1.52	0.3	0.78		0.82	0.11	2.54	16.93	24.7	-714	6091	12	2.26789	70	0.323959	0.947198
2014	[18727] HIDALGO P. J. (2014)	samp. CP17100714B	CENTRAL AMERICAN VOLCANIC ARC / CENTRAL AMERICAN VOLCANIC ARC-SOUTHEASTERN SEGMENT / PANAMA / EL BARU / BAMBITO UNIT	Central American	8.83	-82.61	QUATERNARY	QUATERNARY	55.5929	0.744366	16.2843	7.38248	6.64424		8.36137	6.47497	0.493549	1.2848	3.5179	0.234526	979	9.39	104.26	65	19.53	17.19	39.53	4.48	16.82	3.06	1	3.29	0.44	2.25	0.43	1.04		0.88	0.1	2.68	15.81	-5.4	-111	-3061	12	2.04713	65	0.319425	0.925161
2014	[18727] HIDALGO P. J. (2014)	samp. CP171107-10A	CENTRAL AMERICAN VOLCANIC ARC / CENTRAL AMERICAN VOLCANIC ARC-SOUTHEASTERN SEGMENT / PANAMA / EL BARU / BAMBITO UNIT	Central American	8.83	-82.61	QUATERNARY	QUATERNARY	55.7579	0.738717	16.3327	7.26574	6.53917		8.25744	6.47642	0.49759	1.29528	3.51143	0.242866	990	9.79	101.12	65	19.27	17.73	40.38	4.56	17.2	3.13	1.05	3.35	0.44	2.29	0.44	1.08		0.92	0.11	2.71	15.63	-0.2	-168	-2259	12	1.80561	65	0.320375	0.927907
2014	[18727] HIDALGO P. J. (2014)	samp. NB1510073C	CENTRAL AMERICAN VOLCANIC ARC / CENTRAL AMERICAN VOLCANIC ARC-SOUTHEASTERN SEGMENT / PANAMA / EL BARU / BAMBITO UNIT	Central American	8.83	-82.61	QUATERNARY	QUATERNARY	56.4752	0.714359	16.2568	7.03133	6.3282		7.90897	6.34759	0.500765	1.29605	3.63302	0.224513	955	9.63	99.17	68	21.4	18.4	37.85	4.3	16.94	3.18	1.05	2.74	0.38	1.79	0.34	0.9		0.86	0.12	2.61	16.28	18.6	-590	5463	12	0.819067	68	0.318885	0.939843
2014	[18727] HIDALGO P. J. (2014)	samp. PH1610078B	CENTRAL AMERICAN VOLCANIC ARC / CENTRAL AMERICAN VOLCANIC ARC-SOUTHEASTERN SEGMENT / PANAMA / EL BARU / CUESTA UNIT	Central American	8.68	-80.62	QUATERNARY	QUATERNARY	52.8435	1.08031	15.7155	8.03098	7.22789		9.62087	7.57236	0.511637	1.35548	3.10844	0.550347	1281	14.5	88.34	129	35.46	40.42	79.05	9.29	34.46	5.92	1.71	4.77	0.61	2.89	0.51	1.31		1.14	0.17	3.14	19.08	13.2	-694	6459	12	0.421519	129	0.308267	0.879405
2014	[18727] HIDALGO P. J. (2014)	samp. NB03081001A	CENTRAL AMERICAN VOLCANIC ARC / CENTRAL AMERICAN VOLCANIC ARC-SOUTHEASTERN SEGMENT / PANAMA / EL BARU / CUESTA UNIT	Central American	8.68	-80.62	QUATERNARY	QUATERNARY	52.0436	0.815411	15.3195	8.24585	7.42127		8.68413	10.1009	0.576464	1.75313	2.59912	0.315972	895	12.87	69.54	102	26.17	25.91	48.88	6.09	23.94	4.24	1.25	3.2	0.43	2.12	0.43	1.1		0.99	0.14	2.84	17.35	20.3	-703	3688	12	0.93757	102	0.300501	0.866095
2014	[18727] HIDALGO P. J. (2014)	samp. BM30100745B	CENTRAL AMERICAN VOLCANIC ARC / CENTRAL AMERICAN VOLCANIC ARC-SOUTHEASTERN SEGMENT / PANAMA / EL BARU / CUESTA UNIT	Central American	8.68	-80.62	QUATERNARY	QUATERNARY	48.8455	0.840591	14.6445	9.04395	8.13957		10.1985	12.3759	0.603248	0.810209	2.79522	0.303828	863	12.25	70.45	54	18.79	20.1	40.64	4.87	19.24	3.58	1.11	3.56	0.48	2.65	0.49	1.24		1.07	0.14	2.83	15.06	6.5	-225	865	12	0.576616	54	0.28726	0.812872
2014	[18727] HIDALGO P. J. (2014)	samp. BO301007-43	CENTRAL AMERICAN VOLCANIC ARC / CENTRAL AMERICAN VOLCANIC ARC-SOUTHEASTERN SEGMENT / PANAMA / EL BARU / CUESTA UNIT	Central American	8.68	-80.62	QUATERNARY	QUATERNARY	48.5118	0.799757	14.0616	9.32375	8.39138		10.1134	13.1403	0.610278	1.0326	2.60174	0.283458	808	11.53	70.08	58	18.53	19.09	40.87	4.76	18.67	5.23	1.12	3.53	0.48	2.59	0.48	1.22		1.03	0.13	2.83	15.42	-13	-364	6397	12	3.21888	58	0.275825	0.80732
2014	[18727] HIDALGO P. J. (2014)	samp. BM30100745C	CENTRAL AMERICAN VOLCANIC ARC / CENTRAL AMERICAN VOLCANIC ARC-SOUTHEASTERN SEGMENT / PANAMA / EL BARU / CUESTA UNIT	Central American	8.68	-80.62	QUATERNARY	QUATERNARY	47.8959	0.787163	13.957	9.54688	8.5922		9.77899	14.4919	0.627787	0.7	2.44222	0.262388	812	11.89	68.29	51	18.07	19.15	38.77	4.58	18.12	3.4	1.06	3.46	0.48	2.6	0.49	1.24		1.06	0.14	2.8	14.71	7.6	-165	679	12	0.573857	51	0.273774	0.797069
2019	[23270] AZIZI H. (2019)	samp. TG-1	ANATOLIA-IRAN BELT - CENOZOIC/QUATERNARY / IRAN / SANANDAJ-SIRJAN ARC / SAQQEZ-TAKAB GRANITOIDS	Anatolia-Iran Belt	36.25	46.27	PALEOCENE	CENOZOIC	70.9	0.05	15.6	0.884	0.795601		1.93	0.091	0.102639	3.68	4.76	0.02	687	1.4	490.71	10.9	62.22	11.2	15.1	1.27	3.82	0.413	0.249	0.389	0.046	0.325	0.059	0.153	0.024	0.18	0.029	1.07	20.78	135.6	-427	-14	13	3.0898	10.9	0.306002	1.1799
2019	[23270] AZIZI H. (2019)	samp. TG-3	ANATOLIA-IRAN BELT - CENOZOIC/QUATERNARY / IRAN / SANANDAJ-SIRJAN ARC / SAQQEZ-TAKAB GRANITOIDS	Anatolia-Iran Belt	36.25	46.27	PALEOCENE	CENOZOIC	75.7	0.22	14.5	1.97	1.773		0.98	0.48	0.213049	4.14	4.17	0.08	520	3.47	149.86	22.6	98.33	29.5	41.4	3.71	12	1.57	0.451	1.11	0.121	0.683	0.118	0.327	0.048	0.3	0.049	1.95	23.75	88.9	-682	6051	13	1.044	22.6	0.284425	1.25978
2019	[23270] AZIZI H. (2019)	samp. TG-12	ANATOLIA-IRAN BELT - CENOZOIC/QUATERNARY / IRAN / SANANDAJ-SIRJAN ARC / SAQQEZ-TAKAB GRANITOIDS	Anatolia-Iran Belt	36.25	46.27	PALEOCENE	CENOZOIC	70.3	0.34	15	2.54	2.286		2.26	1	0.304321	2.68	5.14	0.15	838	4.21	199.05	12.8	88.89	32	48.1	4.48	14.8	1.95	0.628	1.38	0.166	0.798	0.143	0.414	0.056	0.36	0.057	2.14	23.52	75.3	-720	5738	13	0.837771	12.8	0.294233	1.16991
2019	[23535] YAMAMOTO T.(2019) [GeoReM [12135] ]	samp. MAS03	HONSHU ARC / SOUTHWESTERN HONSHU ARC / HONSHU / DAISEN / MASUMIZUHARA UNIT	Honshu Arc	35.369	133.473	CENOZOIC	CENOZOIC	65.52	0.38	17.14	3.81	3.429		4.32	1.53	0.30853	1.94	4.39	0.13	644	8.43725	76.33	83	24.66	17.3734	33.1388	3.46711	12.7869	2.17678	0.69778	1.6969	0.241766	1.34381	0.274933	0.720404	0.109955	0.704549	0.108921	2.37	16.46	58.8	-603	692	13	0.209045	83	0.33621	1.09036
2019	[23535] YAMAMOTO T.(2019) [GeoReM [12135] ]	samp. MAS02	HONSHU ARC / SOUTHWESTERN HONSHU ARC / HONSHU / DAISEN / MASUMIZUHARA UNIT	Honshu Arc	35.369	133.473	CENOZOIC	CENOZOIC	65.31	0.372	17.15	3.73	3.357		4.28	1.52	0.311667	1.9	4.34	0.14	634	7.63479	83.04	81	27.32	18.2005	36.726	3.60281	12.885	2.07353	0.643867	1.52328	0.222004	1.25745	0.247392	0.66916	0.10211	0.666272	0.098905	2.33	17.37	66.5	-675	-1934	13	0.231482	81	0.336406	1.08687
2019	[23270] AZIZI H. (2019)	samp. TG-7	ANATOLIA-IRAN BELT - CENOZOIC/QUATERNARY / IRAN / SANANDAJ-SIRJAN ARC / SAQQEZ-TAKAB GRANITOIDS	Anatolia-Iran Belt	36.25	46.27	PALEOCENE	CENOZOIC	68.5	0.36	16.9	2.82	2.538		2.19	1.15	0.311822	4.82	4.33	0.18	1020	4.71	216.56	15.2	87.75	35.1	55.7	5.38	17.9	2.16	0.706	1.73	0.196	1.02	0.175	0.465	0.069	0.4	0.064	2.3	23.43	65.7	-675	3245	13	1.31152	15.2	0.331503	1.13996
2019	[23535] YAMAMOTO T.(2019) [GeoReM [12135] ]	samp. MAS08	HONSHU ARC / SOUTHWESTERN HONSHU ARC / HONSHU / DAISEN / MASUMIZUHARA UNIT	Honshu Arc	35.3282	133.477	CENOZOIC	CENOZOIC	63.6	0.391	16.28	4.29	3.861		4.66	1.78	0.315547	1.85	4.23	0.14	691	7.60382	90.88	72	30.29	18.1751	34.7168	3.54397	12.8654	2.16878	0.676197	1.5873	0.227378	1.2394	0.240357	0.661777	0.0935149	0.599947	0.0930866	2.31	17.66	55.5	-616	885	13	0.248925	72	0.319341	1.05841
2019	[23535] YAMAMOTO T.(2019) [GeoReM [12135] ]	samp. MAS04	HONSHU ARC / SOUTHWESTERN HONSHU ARC / HONSHU / DAISEN / MASUMIZUHARA UNIT	Honshu Arc	35.369	133.473	CENOZOIC	CENOZOIC	64.45	0.4	16.97	4.07	3.663		4.88	1.72	0.319524	1.71	4.36	0.14	689	6.89614	99.91	90	38.27	20.1702	37.5821	3.83549	13.9309	2.2798	0.763164	1.67243	0.233413	1.21142	0.236225	0.610104	0.0851711	0.527006	0.0787476	2.31	18.97	44.5	-537	1253	13	0.226556	90	0.332876	1.07256
2019	[23535] YAMAMOTO T.(2019) [GeoReM [12135] ]	samp. MIS06	HONSHU ARC / SOUTHWESTERN HONSHU ARC / HONSHU / DAISEN / MISEN LAVA DOME	Honshu Arc	35.3709	133.54	CENOZOIC	CENOZOIC	65.15	0.404	17.18	4.25	3.825		4.97	1.81	0.321207	1.8	4.33	0.12	697	6.97189	99.97	75	26.51	15.7641	29.9713	3.0582	11.3454	1.87929	0.62212	1.41994	0.207695	1.16874	0.22926	0.614074	0.0896187	0.594576	0.0884745	2.22	16.97	58.9	-576	55	13	0.194857	75	0.336995	1.08421
2019	[23535] YAMAMOTO T.(2019) [GeoReM [12135] ]	samp. MIS07	HONSHU ARC / SOUTHWESTERN HONSHU ARC / HONSHU / DAISEN / MISEN LAVA DOME	Honshu Arc	35.3709	133.54	CENOZOIC	CENOZOIC	65	0.405	17.13	4.2	3.78		5.04	1.79	0.321364	1.71	4.36	0.14	701	8.45942	82.87	80	22.89	16.736	32.3789	3.33219	12.4674	2.142	0.701522	1.69943	0.245115	1.36343	0.271696	0.763011	0.109429	0.731154	0.109355	2.37	16.11	58.3	-567	364	13	0.233847	80	0.336014	1.08171
2019	[23535] YAMAMOTO T.(2019) [GeoReM [12135] ]	samp. MIS03	HONSHU ARC / SOUTHWESTERN HONSHU ARC / HONSHU / DAISEN / MISEN LAVA DOME	Honshu Arc	35.3709	133.54	CENOZOIC	CENOZOIC	65.15	0.394	17.16	4.1	3.69		5.02	1.76	0.322936	1.72	4.38	0.15	688	7.94177	86.63	82	24.06	16.8091	32.3915	3.32689	12.3393	2.11276	0.677854	1.65392	0.236066	1.28667	0.258365	0.712625	0.108255	0.698586	0.104175	2.34	16.43	59.5	-603	545	13	0.261251	82	0.336603	1.08421
2019	[23535] YAMAMOTO T.(2019) [GeoReM [12135] ]	samp. MIS01	HONSHU ARC / SOUTHWESTERN HONSHU ARC / HONSHU / DAISEN / MISEN LAVA DOME	Honshu Arc	35.3709	133.54	CENOZOIC	CENOZOIC	65.05	0.418	17.62	4.16	3.744		4.99	1.79	0.323455	1.73	4.36	0.16	700	8.01772	87.31	88	24.41	16.6688	31.8739	3.27049	12.159	2.08544	0.704178	1.60055	0.228286	1.29314	0.247893	0.711432	0.108314	0.682973	0.108474	2.33	16.34	63.1	-645	1152	13	0.256345	88	0.345626	1.08254
2019	[23270] AZIZI H. (2019)	samp. TG-9	ANATOLIA-IRAN BELT - CENOZOIC/QUATERNARY / IRAN / SANANDAJ-SIRJAN ARC / SAQQEZ-TAKAB GRANITOIDS	Anatolia-Iran Belt	36.25	46.27	PALEOCENE	CENOZOIC	69.4	0.31	15	2.48	2.232		1.99	1.07	0.324046	3.29	4.7	0.16	842	3.43	245.48	9.93	97.89	27.9	43.5	4.03	13.3	1.7	0.586	1.27	0.132	0.727	0.115	0.352	0.049	0.285	0.043	1.98	24.14	67.4	-684	3462	13	2.29149	9.93	0.294233	1.15493
2019	[23535] YAMAMOTO T.(2019) [GeoReM [12135] ]	samp. MAS07	HONSHU ARC / SOUTHWESTERN HONSHU ARC / HONSHU / DAISEN / MASUMIZUHARA UNIT	Honshu Arc	35.3282	133.477	CENOZOIC	CENOZOIC	63.55	0.381	16.31	3.99	3.591		4.56	1.74	0.326393	1.88	4.3	0.12	664	7.28697	91.12	69	29.27	17.6133	33.4805	3.42423	12.353	2.0877	0.667364	1.53466	0.215264	1.19519	0.227835	0.612255	0.0942205	0.601749	0.0911905	2.27	17.59	58.9	-661	1365	13	0.17769	69	0.319929	1.05758
2019	[23270] AZIZI H. (2019)	samp. TG-11	ANATOLIA-IRAN BELT - CENOZOIC/QUATERNARY / IRAN / SANANDAJ-SIRJAN ARC / SAQQEZ-TAKAB GRANITOIDS	Anatolia-Iran Belt	36.25	46.27	PALEOCENE	CENOZOIC	66.4	0.34	15.7	2.38	2.142		1.81	1.05	0.328947	4.93	4.47	0.14	956	5.24	182.44	14.4	80.38	34	55.8	5.42	18.3	2.29	0.722	1.79	0.197	1.07	0.177	0.498	0.065	0.423	0.049	2.29	23.75	49	-496	-1090	13	2.24614	14.4	0.307964	1.10501
2019	[23270] AZIZI H. (2019)	samp. TG-2	ANATOLIA-IRAN BELT - CENOZOIC/QUATERNARY / IRAN / SANANDAJ-SIRJAN ARC / SAQQEZ-TAKAB GRANITOIDS	Anatolia-Iran Belt	36.25	46.27	PALEOCENE	CENOZOIC	67.3	0.4	15.2	2.56	2.304		2.21	1.15	0.332947	3.14	4.74	0.18	939	5.06	185.57	8.78	100.48	42.2	61.7	5.76	19.1	2.6	0.78	1.82	0.206	1.04	0.185	0.481	0.067	0.42	0.052	2.35	24.5	56.7	-458	3097	13	1.47362	8.78	0.298156	1.11999
2019	[23270] AZIZI H. (2019)	samp. TG-10	ANATOLIA-IRAN BELT - CENOZOIC/QUATERNARY / IRAN / SANANDAJ-SIRJAN ARC / SAQQEZ-TAKAB GRANITOIDS	Anatolia-Iran Belt	36.25	46.27	PALEOCENE	CENOZOIC	69.6	0.35	16.2	2.42	2.178		2.13	1.1	0.33557	3.06	5.24	0.16	783	3.94	198.73	13.4	94.44	32.3	48.4	4.48	14.5	1.84	0.623	1.43	0.171	0.843	0.132	0.383	0.052	0.342	0.046	2.1	24.13	64.3	-518	4614	13	1.50125	13.4	0.317772	1.15826
2019	[23535] YAMAMOTO T.(2019) [GeoReM [12135] ]	samp. SAS01	HONSHU ARC / SOUTHWESTERN HONSHU ARC / HONSHU / DAISEN / SASAGANARU UNIT	Honshu Arc	35.3288	133.574	CENOZOIC	CENOZOIC	63.73	0.4	17.23	3.82	3.438		4.69	1.75	0.337317	1.84	4.28	0.15	755	7.98378	94.57	89	31.07	20.5603	38.5171	3.9644	14.3914	2.35895	0.715958	1.73174	0.244828	1.36073	0.259234	0.710053	0.103354	0.66182	0.102778	2.4	17.81	58.5	-646	1017	13	0.153492	89	0.337976	1.06058
2019	[23535] YAMAMOTO T.(2019) [GeoReM [12135] ]	samp. NOD05	HONSHU ARC / SOUTHWESTERN HONSHU ARC / HONSHU / DAISEN / NODAGASEN UNIT	Honshu Arc	35.3872	133.563	CENOZOIC	CENOZOIC	64.06	0.474	17.08	4.45	4.005		4.93	2.05	0.338563	2	4.38	0.18	947	6.66771	142.03	83	37.99	22.3448	44.4057	4.37115	15.8927	2.54833	0.816135	1.64042	0.232187	1.22902	0.226907	0.622872	0.0890675	0.588121	0.0903923	2.38	19.48	56.3	-853	1626	13	0.443838	83	0.335033	1.06607
2019	[23535] YAMAMOTO T.(2019) [GeoReM [12135] ]	samp. SAS06	HONSHU ARC / SOUTHWESTERN HONSHU ARC / HONSHU / DAISEN / SASAGANARU UNIT	Honshu Arc	35.304	133.57	CENOZOIC	CENOZOIC	63.72	0.416	17.15	4.08	3.672		4.82	1.9	0.34099	1.93	4.48	0.21	861	8.6029	100.08	111	26.87	21.0929	41.4682	4.4749	16.4062	2.91457	0.882424	2.00188	0.287278	1.57913	0.302738	0.840949	0.116843	0.784997	0.115329	2.54	17.4	47.9	-714	958	13	0.515618	111	0.336406	1.06041
2019	[23535] YAMAMOTO T.(2019) [GeoReM [12135] ]	samp. NAW05	HONSHU ARC / SOUTHWESTERN HONSHU ARC / HONSHU / DAISEN / NAWA UNIT	Honshu Arc	35.4597	133.552	CENOZOIC	CENOZOIC	65.1	0.388	17.92	3.61	3.249		4.47	1.71	0.344827	1.76	4.56	0.14	710	5.80187	122.37	85	31.07	13.8122	28.4685	2.94983	11.3128	1.91213	0.637093	1.39923	0.185443	1.00132	0.190053	0.486316	0.0706813	0.44452	0.0658775	2.08	18.29	35.9	-708	1730	13	0.323401	85	0.35151	1.08337
2019	[23535] YAMAMOTO T.(2019) [GeoReM [12135] ]	samp. MAS05	HONSHU ARC / SOUTHWESTERN HONSHU ARC / HONSHU / DAISEN / MASUMIZUHARA UNIT	Honshu Arc	35.369	133.473	CENOZOIC	CENOZOIC	64.56	0.407	17.23	3.69	3.321		4.7	1.75	0.345099	1.84	4.37	0.14	733	7.31212	100.24	71	30.19	18.5825	35.0254	3.51429	13.081	2.12267	0.683364	1.58472	0.219695	1.23589	0.238126	0.633602	0.0960812	0.615475	0.0962756	2.31	17.66	60.9	-665	1546	13	0.21191	71	0.337976	1.07439
2019	[23535] YAMAMOTO T.(2019) [GeoReM [12135] ]	samp. MAK01	HONSHU ARC / SOUTHWESTERN HONSHU ARC / HONSHU / DAISEN / MAKIBARA UNIT	Honshu Arc	35.4123	133.478	CENOZOIC	CENOZOIC	63.29	0.41	18.19	4.11	3.699		4.85	1.96	0.346351	1.54	4.28	0.14	708	8.2176	86.16	88	27.58	18.9472	33.9136	3.96364	14.5579	2.41033	0.730097	1.78612	0.250297	1.36008	0.272019	0.7252	0.107719	0.686909	0.108962	2.41	17.14	53	-731	2073	13	0.416679	88	0.356807	1.05325
2019	[23535] YAMAMOTO T.(2019) [GeoReM [12135] ]	samp. SAN02	HONSHU ARC / SOUTHWESTERN HONSHU ARC / HONSHU / DAISEN / SANKOHOH LAVA DOME	Honshu Arc	35.4123	133.478	CENOZOIC	CENOZOIC	63.83	0.453	17.23	4.11	3.699		4.84	1.97	0.347504	1.93	4.32	0.18	822	6.48055	126.84	81	36.3	19.773	37.2252	3.76551	13.9439	2.26408	0.793516	1.54774	0.217352	1.1511	0.214774	0.591895	0.0847507	0.544769	0.0871447	2.29	18.84	55.6	-767	2936	13	0.308435	81	0.337976	1.06224
2019	[23535] YAMAMOTO T.(2019) [GeoReM [12135] ]	samp. AMI05	HONSHU ARC / SOUTHWESTERN HONSHU ARC / HONSHU / DAISEN / AMIDAGAWA UNIT	Honshu Arc	35.4179	133.544	CENOZOIC	CENOZOIC	62.74	0.517	17.71	4.5	4.05		4.99	2.16	0.347826	2.05	4.43	0.2	1078	7.41574	145.37	88	38.19	23.8002	46.6731	4.9384	18.3445	2.87099	0.895225	1.95894	0.267926	1.34918	0.2518	0.693166	0.0995632	0.623238	0.0877657	2.47	19.63	41.7	-791	531	13	0.521487	88	0.347391	1.0441
2019	[23535] YAMAMOTO T.(2019) [GeoReM [12135] ]	samp. SAS05	HONSHU ARC / SOUTHWESTERN HONSHU ARC / HONSHU / DAISEN / SASAGANARU UNIT	Honshu Arc	35.3288	133.574	CENOZOIC	CENOZOIC	64.39	0.42	17.52	4.08	3.672		4.84	1.96	0.348011	1.88	4.53	0.21	767	8.21683	93.35	99	24.6	16.9293	32.501	3.33275	12.2713	2.13006	0.705635	1.60988	0.23047	1.3209	0.253258	0.705802	0.104573	0.688314	0.103491	2.33	16.55	59.8	-605	711	13	0.207754	99	0.343664	1.07156
2019	[23535] YAMAMOTO T.(2019) [GeoReM [12135] ]	samp. NOD01	HONSHU ARC / SOUTHWESTERN HONSHU ARC / HONSHU / DAISEN / NODAGASEN UNIT	Honshu Arc	35.3872	133.563	CENOZOIC	CENOZOIC	65.13	0.471	16.46	4.25	3.825		5.01	2.05	0.348936	2.06	4.4	0.19	950	8.95059	106.14	86	42.43	30.0617	58.119	5.94456	21.4413	3.24464	0.886672	2.20076	0.295137	1.59939	0.2926	0.797768	0.112698	0.708436	0.10692	2.63	20	51.1	-791	241	13	0.258295	86	0.322872	1.08387
2019	[23535] YAMAMOTO T.(2019) [GeoReM [12135] ]	samp. AMI01	HONSHU ARC / SOUTHWESTERN HONSHU ARC / HONSHU / DAISEN / AMIDAGAWA UNIT	Honshu Arc	35.4179	133.544	CENOZOIC	CENOZOIC	63.75	0.431	16.86	3.97	3.573		4.64	1.92	0.349536	1.99	4.37	0.14	817	7.38863	110.58	83	30.43	19.5743	37.3854	3.85916	14.3041	2.35798	0.796214	1.65731	0.234663	1.31006	0.25319	0.689585	0.0989561	0.643262	0.0976037	2.37	17.87	56	-691	496	13	0.356595	83	0.330718	1.06091
2019	[23270] AZIZI H. (2019)	samp. TG-13	ANATOLIA-IRAN BELT - CENOZOIC/QUATERNARY / IRAN / SANANDAJ-SIRJAN ARC / SAQQEZ-TAKAB GRANITOIDS	Anatolia-Iran Belt	36.25	46.27	PALEOCENE	CENOZOIC	62	0.93	15.6	4.42	3.978		3.24	2.14	0.349787	4.32	4.78	0.4	928	10.9	85.14	19.7	76.36	70.4	122	12.1	40.7	5.34	1.33	3.89	0.455	2.3	0.421	1.02	0.154	0.922	0.143	3.11	23.13	54.8	-791	3122	13	0.559414	19.7	0.306002	1.03179
2019	[23535] YAMAMOTO T.(2019) [GeoReM [12135] ]	samp. NOD04	HONSHU ARC / SOUTHWESTERN HONSHU ARC / HONSHU / DAISEN / NODAGASEN UNIT	Honshu Arc	35.3872	133.563	CENOZOIC	CENOZOIC	64.09	0.468	17.21	4.1	3.69		4.95	1.99	0.350352	2	4.45	0.18	961	8.01085	119.96	85	32.17	21.9781	44.523	4.52702	16.7909	2.76519	0.840992	1.93356	0.268786	1.42188	0.27038	0.726987	0.105326	0.683158	0.0986035	2.48	18.57	47.1	-743	581	13	0.350575	85	0.337583	1.06657
2019	[23535] YAMAMOTO T.(2019) [GeoReM [12135] ]	samp. VAW03	HONSHU ARC / SOUTHWESTERN HONSHU ARC / HONSHU / DAISEN / NAWA UNIT	Honshu Arc	35.4597	133.552	CENOZOIC	CENOZOIC	63.85	0.386	17.68	3.56	3.204		4.27	1.74	0.351942	1.74	4.43	0.12	676	5.70852	118.42	81	28.53	14.3	25.83	2.76619	10.0846	1.80543	0.676935	1.33606	0.186131	1.01955	0.194292	0.538671	0.0745744	0.501211	0.0714016	2.09	17.41	48.6	-540	2385	13	0.406858	81	0.346803	1.06257
2019	[23535] YAMAMOTO T.(2019) [GeoReM [12135] ]	samp. SAS07	HONSHU ARC / SOUTHWESTERN HONSHU ARC / HONSHU / DAISEN / SASAGANARU UNIT	Honshu Arc	35.304	133.57	CENOZOIC	CENOZOIC	63.57	0.419	17.75	3.85	3.465		4.66	1.89	0.352941	1.71	4.1	0.16	724	7.60698	95.18	96	25.13	18.1345	34.8481	3.73368	13.628	2.39404	0.754015	1.73144	0.24856	1.35014	0.262801	0.736148	0.1109	0.721545	0.1051	2.4	16.9	55.3	-688	807	13	0.400912	96	0.348176	1.05791
2019	[23535] YAMAMOTO T.(2019) [GeoReM [12135] ]	samp. MAS09	HONSHU ARC / SOUTHWESTERN HONSHU ARC / HONSHU / DAISEN / MASUMIZUHARA UNIT	Honshu Arc	35.3282	133.477	CENOZOIC	CENOZOIC	64.28	0.421	17.39	3.64	3.276		4.72	1.79	0.353336	1.84	4.43	0.15	732	7.48875	97.75	70	29.83	18.4205	35.0133	3.52937	13.1835	2.14598	0.663833	1.58768	0.227991	1.20954	0.239875	0.666181	0.094972	0.617533	0.0932679	2.31	17.67	57.8	-636	659	13	0.345159	70	0.341114	1.06973
2019	[23535] YAMAMOTO T.(2019) [GeoReM [12135] ]	samp. NAW08	HONSHU ARC / SOUTHWESTERN HONSHU ARC / HONSHU / DAISEN / BORYO UNIT	Honshu Arc	35.4564	133.501	CENOZOIC	CENOZOIC	64.31	0.439	17.72	3.72	3.348		4.89	1.83	0.353418	1.93	4.42	0.17	884	7.37331	119.89	81	35.51	21.6592	43.1186	4.26329	15.4295	2.42708	0.794108	1.66479	0.225356	1.23313	0.235018	0.647737	0.0918278	0.609973	0.0960264	2.38	19	60.6	-847	1029	13	0.369704	81	0.347587	1.07023
2019	[23535] YAMAMOTO T.(2019) [GeoReM [12135] ]	samp. SAS03	HONSHU ARC / SOUTHWESTERN HONSHU ARC / HONSHU / DAISEN / SASAGANARU UNIT	Honshu Arc	35.3288	133.574	CENOZOIC	CENOZOIC	63.34	0.448	17.93	4.1	3.69		4.71	2.02	0.353765	1.92	4.5	0.22	798	7.89225	101.11	106	29.46	21.0462	40.0011	4.17203	14.9474	2.5496	0.80777	1.8439	0.254101	1.42379	0.275432	0.77433	0.105749	0.714368	0.110004	2.46	17.66	57.3	-683	1310	13	0.418232	106	0.351707	1.05409
2019	[23270] AZIZI H. (2019)	samp. TG-8	ANATOLIA-IRAN BELT - CENOZOIC/QUATERNARY / IRAN / SANANDAJ-SIRJAN ARC / SAQQEZ-TAKAB GRANITOIDS	Anatolia-Iran Belt	36.25	46.27	PALEOCENE	CENOZOIC	70.2	0.36	15.3	2.43	2.187		2.24	1.2	0.354296	3.37	5.04	0.18	644	4.17	154.44	10.4	98.85	34.4	51.5	4.76	16	2.07	0.658	1.47	0.167	0.829	0.148	0.405	0.054	0.348	0.052	2.16	24.24	67.4	-665	5343	13	0.897263	10.4	0.300118	1.16825
2019	[23535] YAMAMOTO T.(2019) [GeoReM [12135] ]	samp. MAK04	HONSHU ARC / SOUTHWESTERN HONSHU ARC / HONSHU / DAISEN / MAKIBARA UNIT	Honshu Arc	35.4123	133.478	CENOZOIC	CENOZOIC	63.77	0.412	17.89	4.07	3.663		4.81	2.01	0.35431	1.65	4.31	0.17	657	7.10414	92.48	72	25.62	15.8632	30.5879	3.27754	12.1588	2.10795	0.70969	1.54759	0.216959	1.228	0.238155	0.640004	0.0940743	0.619171	0.0982956	2.27	16.85	54.6	-718	2112	13	0.216446	72	0.350922	1.06124
2019	[23535] YAMAMOTO T.(2019) [GeoReM [12135] ]	samp. NAW06	HONSHU ARC / SOUTHWESTERN HONSHU ARC / HONSHU / DAISEN / BORYO UNIT	Honshu Arc	35.4564	133.501	CENOZOIC	CENOZOIC	63.93	0.502	17.33	4.06	3.654		4.86	2.03	0.357143	2.02	4.4	0.17	954	8.25036	115.63	79	37.42	25.9079	48.0715	5.0261	18.1069	2.78268	0.841906	1.90401	0.261568	1.4451	0.269006	0.75018	0.105894	0.692389	0.10459	2.52	19.17	58.5	-777	483	13	0.322472	79	0.339937	1.0639
2019	[23535] YAMAMOTO T.(2019) [GeoReM [12135] ]	samp. NAW07	HONSHU ARC / SOUTHWESTERN HONSHU ARC / HONSHU / DAISEN / BORYO UNIT	Honshu Arc	35.4564	133.501	CENOZOIC	CENOZOIC	64.88	0.47	17.24	4.01	3.609		4.72	2.01	0.357715	2	4.39	0.16	836	7.98405	104.71	78	33.3	22.1666	44.8458	4.57869	16.7422	2.67027	0.809827	1.84243	0.260799	1.37203	0.270416	0.706856	0.102869	0.665652	0.101559	2.47	18.68	52.3	-796	261	13	0.288831	78	0.338172	1.07971
2019	[23535] YAMAMOTO T.(2019) [GeoReM [12135] ]	samp. MAS10	HONSHU ARC / SOUTHWESTERN HONSHU ARC / HONSHU / DAISEN / MASUMIZUHARA UNIT	Honshu Arc	35.3282	133.477	CENOZOIC	CENOZOIC	63.24	0.411	17.48	3.69	3.321		4.84	1.86	0.359004	1.61	4.37	0.17	740	7.84461	94.33	78	27.99	18.4082	35.1909	3.74669	13.6558	2.26773	0.731503	1.7385	0.241475	1.33046	0.263132	0.702946	0.0974055	0.657652	0.0982073	2.37	17.41	51.6	-624	780	13	0.247137	78	0.34288	1.05242
2019	[23535] YAMAMOTO T.(2019) [GeoReM [12135] ]	samp. NAW04	HONSHU ARC / SOUTHWESTERN HONSHU ARC / HONSHU / DAISEN / NAWA UNIT	Honshu Arc	35.4597	133.552	CENOZOIC	CENOZOIC	64.73	0.401	17.85	3.65	3.285		4.32	1.85	0.360272	1.72	4.52	0.11	701	6.17791	113.47	87	21.21	11.4027	23.0165	2.30845	9.14287	1.77672	0.672939	1.39612	0.200482	1.12269	0.219661	0.582772	0.0852128	0.537726	0.0813779	2.1	15.53	40.9	-455	2495	13	0.476219	87	0.350137	1.07722
2019	[23535] YAMAMOTO T.(2019) [GeoReM [12135] ]	samp. AMI02	HONSHU ARC / SOUTHWESTERN HONSHU ARC / HONSHU / DAISEN / AMIDAGAWA UNIT	Honshu Arc	35.4179	133.544	CENOZOIC	CENOZOIC	64.17	0.474	17.1	4.08	3.672		4.8	2.08	0.361613	2.01	4.51	0.17	930	7.22097	128.79	85	33.95	20.6202	40.1394	4.0463	14.8791	2.35667	0.805839	1.68725	0.237153	1.2337	0.239881	0.634231	0.0914983	0.607436	0.092467	2.36	18.68	54.7	-750	1655	13	0.219724	85	0.335426	1.0679
2019	[23535] YAMAMOTO T.(2019) [GeoReM [12135] ]	samp. MKB07	HONSHU ARC / SOUTHWESTERN HONSHU ARC / HONSHU / DAISEN / MAKIBARA UNIT	Honshu Arc	35.4123	133.478	CENOZOIC	CENOZOIC	64.92	0.406	17.95	3.74	3.366		4.3	1.93	0.364426	1.69	4.05	0.13	643	4.77492	134.66	79	24.33	12.0654	19.7648	1.98429	7.00101	1.27921	0.66241	0.966512	0.140996	0.831647	0.171109	0.468886	0.0727208	0.496001	0.0777348	1.9	15.81	83.2	-476	2967	13	0.404083	79	0.352099	1.08038
2019	[23535] YAMAMOTO T.(2019) [GeoReM [12135] ]	samp. MAK05	HONSHU ARC / SOUTHWESTERN HONSHU ARC / HONSHU / DAISEN / MAKIBARA UNIT	Honshu Arc	35.4123	133.478	CENOZOIC	CENOZOIC	62.06	0.427	18.66	4.08	3.672		5.23	2.11	0.364925	1.25	4.36	0.16	764	6.92177	110.38	86	28.1	17.208	28.9832	3.28571	12.027	1.99236	0.718918	1.46676	0.205625	1.1619	0.221782	0.618072	0.0948037	0.612412	0.092433	2.25	17.15	62.2	-665	2260	13	0.533988	86	0.366026	1.03278
2019	[23535] YAMAMOTO T.(2019) [GeoReM [12135] ]	samp. NAW09	HONSHU ARC / SOUTHWESTERN HONSHU ARC / HONSHU / DAISEN / BORYO UNIT	Honshu Arc	35.4564	133.501	CENOZOIC	CENOZOIC	64.18	0.45	16.69	3.92	3.528		4.92	2.03	0.365239	1.94	4.4	0.18	882	9.16362	96.25	78	32.23	23.5706	48.5243	5.03687	18.8273	3.01069	0.859322	2.0923	0.285999	1.50757	0.288302	0.77978	0.113362	0.731335	0.105535	2.56	18.73	46	-821	12	13	0.379663	78	0.327383	1.06806
2019	[23535] YAMAMOTO T.(2019) [GeoReM [12135] ]	samp. SAS09	HONSHU ARC / SOUTHWESTERN HONSHU ARC / HONSHU / DAISEN / SASAGANARU UNIT	Honshu Arc	35.304	133.57	CENOZOIC	CENOZOIC	61.38	0.488	17.49	4.38	3.942		4.72	2.28	0.366441	1.72	4.01	0.22	785	9.51816	82.47	118	26.74	23.0185	50.6275	4.84217	17.8823	3.06904	0.887836	2.19694	0.308835	1.69234	0.334248	0.886065	0.131175	0.860748	0.128311	2.63	17.54	53.3	-743	-505	13	0.65734	118	0.343076	1.02147
2019	[23535] YAMAMOTO T.(2019) [GeoReM [12135] ]	samp. SAS010	HONSHU ARC / SOUTHWESTERN HONSHU ARC / HONSHU / DAISEN / SASAGANARU UNIT	Honshu Arc	35.304	133.57	CENOZOIC	CENOZOIC	62.84	0.434	17.67	3.84	3.456		4.86	2	0.366569	1.79	4.23	0.2	799	8.28968	96.38	101	29.92	21.1625	40.2594	4.295	15.5918	2.68387	0.814142	1.92503	0.271389	1.46728	0.282908	0.771059	0.110655	0.707269	0.109819	2.48	17.7	50.9	-681	1797	13	0.233892	101	0.346607	1.04576
2019	[23535] YAMAMOTO T.(2019) [GeoReM [12135] ]	samp. NAW10	HONSHU ARC / SOUTHWESTERN HONSHU ARC / HONSHU / DAISEN / BORYO UNIT	Honshu Arc	35.4564	133.501	CENOZOIC	CENOZOIC	63.93	0.502	16.91	3.98	3.582		5.18	2.08	0.367361	1.95	4.41	0.18	1027	8.30914	123.6	84	41.79	25.312	50.739	5.57918	20.6585	3.11271	0.928871	2.14496	0.282889	1.45934	0.270481	0.69851	0.0965058	0.605643	0.0918956	2.53	20.16	34.3	-864	1179	13	0.188827	84	0.331699	1.0639
2019	[23535] YAMAMOTO T.(2019) [GeoReM [12135] ]	samp. MKB06	HONSHU ARC / SOUTHWESTERN HONSHU ARC / HONSHU / DAISEN / MAKIBARA UNIT	Honshu Arc	35.4123	133.478	CENOZOIC	CENOZOIC	64.64	0.427	17.35	3.74	3.366		4.53	1.96	0.368006	1.56	4.06	0.14	618	6.80499	90.82	74	25.72	16.612	31.9384	3.3246	12.2563	2.09415	0.675254	1.51474	0.218139	1.20453	0.231821	0.644016	0.0930803	0.645784	0.0985889	2.28	17.03	60.1	-734	2037	13	0.245346	74	0.34033	1.07572
2019	[23535] YAMAMOTO T.(2019) [GeoReM [12135] ]	samp. HOJ01	HONSHU ARC / SOUTHWESTERN HONSHU ARC / HONSHU / DAISEN / DAISEN OLD-STAGE UNIT	Honshu Arc	35.3899	133.536	CENOZOIC	CENOZOIC	64.31	0.456	16.73	3.93	3.537		4.94	2.07	0.369181	1.92	4.25	0.17	904	8.00608	112.91	92	42.28	27.1929	48.6245	5.31961	18.9561	2.79999	0.859061	1.97666	0.263541	1.37675	0.262084	0.701316	0.100017	0.64317	0.0915558	2.5	19.97	51	-746	458	13	0.407442	92	0.328168	1.07023
2019	[23535] YAMAMOTO T.(2019) [GeoReM [12135] ]	samp. NAW12	HONSHU ARC / SOUTHWESTERN HONSHU ARC / HONSHU / DAISEN / NAWA UNIT	Honshu Arc	35.4597	133.552	CENOZOIC	CENOZOIC	64.64	0.385	17.01	3.26	2.934		4.13	1.72	0.369574	1.7	4.24	0.08	622	5.39055	115.39	78	30.98	14.6103	30.5675	2.89622	10.6131	1.91499	0.651521	1.33145	0.188448	1.01225	0.192759	0.516306	0.0763667	0.471536	0.0707994	2.11	18.05	48	-631	954	13	0.771967	78	0.33366	1.07572
2019	[23535] YAMAMOTO T.(2019) [GeoReM [12135] ]	samp. NAW11	HONSHU ARC / SOUTHWESTERN HONSHU ARC / HONSHU / DAISEN / NAWA UNIT	Honshu Arc	35.4597	133.552	CENOZOIC	CENOZOIC	66.3	0.384	17.44	3.27	2.943		4.34	1.74	0.371556	1.75	4.35	0.08	655	6.6257	98.86	72	26.5	15.1919	30.2323	3.1899	11.8693	2.1544	0.697437	1.53883	0.208531	1.14864	0.220144	0.606339	0.0843115	0.573215	0.0858558	2.22	17.32	46.2	-728	2710	13	0.507154	72	0.342095	1.10334
2019	[23535] YAMAMOTO T.(2019) [GeoReM [12135] ]	samp. NAW13	HONSHU ARC / SOUTHWESTERN HONSHU ARC / HONSHU / DAISEN / NAWA UNIT	Honshu Arc	35.4597	133.552	CENOZOIC	CENOZOIC	64.4	0.42	16.95	3.36	3.024		4.09	1.82	0.375722	1.76	4.16	0.06	622	4.79911	129.61	83	26.41	11.8201	21.3387	2.05834	7.45358	1.40161	0.666593	1.01709	0.15372	0.846872	0.164681	0.453286	0.0681068	0.447609	0.0709548	1.9	16.5	67.2	-502	3662	13	0.438208	83	0.332483	1.07173
2019	[23270] AZIZI H. (2019)	samp. TG-6	ANATOLIA-IRAN BELT - CENOZOIC/QUATERNARY / IRAN / SANANDAJ-SIRJAN ARC / SAQQEZ-TAKAB GRANITOIDS	Anatolia-Iran Belt	36.25	46.27	PALEOCENE	CENOZOIC	59.1	0.86	15.4	5.22	4.698		4.54	4.15	0.469032	2.25	4.42	0.34	760	10.5	72.38	198	40.78	42	74.7	7.88	28.6	4.32	1.3	3.23	0.411	2.25	0.391	1.07	0.153	1.03	0.143	2.94	19.81	49.7	-698	2723	13	0.466149	198	0.302079	0.983525
Download from GEOROC - Geochemical Database
Date of Query: Thursday
Please note: There is a List of your Query Criteria at the End of this Sheet.
References:
[2212] KAY R. W.: ALEUTIAN MAGNESIAN ANDESITES: MELTS FROM SUBDUCTED PACIFIC OCEAN CRUST | J. VOLCANOL. GEOTHERM. RES. 4 [1978] 117-132 | doi: 10.1016/0377-0273(78)90032-X
[2484] KEPEZHINSKAS P. K., DEFANT M. J., DRUMMOND M. S.: PROGRESSIVE ENRICHMENT OF ISLAND ARC MANTLE BY MELT-PERIDOTITE INTERACTION INFERRED FROM KAMCHATKA XENOLITHS | GEOCHIM. COSMOCHIM. ACTA 60 [1997] 1217-1229 | doi: 10.1016/0016-7037(96)00001-4
[3520] SAJONA F. G., MAURY R. C., PROUTEAU G., COTTEN J., SCHIANO P., BELLON H., FONTAINE L.: SLAB MELT AS METASOMATIC AGENT IN ISLAND ARC MAGMA MANTLE SOURCES, NEGROS AND BATAN (PHILIPPINES) | THE ISLAND ARC 9 [2000] 472-486 | doi: 10.1111/j.1440-1738.2000.00295.x
[3521] PROUTEAU G., MAURY R. C., SAJONA F. G., COTTEN J., JORON J.-L.: BEHAVIOR OF NIOBIUM, TANTALUM AND OTHER HIGH FIELD STRENGTH ELEMENTS IN ADAKITES AND RELATED LAVAS FROM THE PHILIPPINES | THE ISLAND ARC 9 [2000] 487-498 | doi: 10.1111/j.1440-1738.2000.00296.x
[3941] SAJONA F. G., MAURY R. C., BELLON H., COTTEN J., DEFANT M. J.: HIGH FIELD STRENGTH ELEMENT ENRICHMENT OF PLIOCENE-PLEISTOCENE ISLAND ARC BASALTS, ZAMBOANGA PENINSULA, WESTERN MINDANAO (PHILIPPINES) | J. PETROL. 37 [1996] 693-726 | doi: 10.1093/petrology/37.3.693
[4096] SAJONA F. G., BELLON H., MAURY R. C., PUBELLIER M., QUEBRAL R. D., COTTEN J., BAYON F. E., PAGADO E., PAMATIAN P.: TERTIARY AND QUATERNARY MAGMATISM IN MINDANAO AND LEYTE (PHILIPPINES): GEOCHRONOLOGY, GEOCHEMISTRY AND TECTONIC SETTING | J. ASIAN EARTH SCI. 15 [1997] 121-153 | doi: 10.1016/S0743-9547(97)00002-0
[4687] BEATE B., MONZIER M., SPIKINGS R. A., COTTEN J., SILVA J., BOURDON E., EISSEN J.-P.: MIO-PLIOCENE ADAKITE GENERATION RELATED TO FLAT SUBDUCTION IN SOUTHERN ECUADOR: THE QUIMSACOCHA VOLCANIC CENTER | EARTH PLANET. SCI. LETT. 192 [2001] 561-570 | GeoReM-id: 298 | doi: 10.1016/S0012-821X(01)00466-6
[4936] SIGMARSSON O., CHMELEFF J., MORRIS J. D., LOPEZ-ESCOBAR L.: ORIGIN OF 226RA-230TH DISEQUILIBRIA IN ARC LAVAS FROM SOUTHERN CHILE AND IMPLICATIONS FOR MAGMA TRANSFER TIME | EARTH PLANET. SCI. LETT. 196 [2002] 189-196 | doi: 10.1016/S0012-821X(01)00611-2
[5369] SIGMARSSON O., MARTIN H., KNOWLES J.: MELTING OF A SUBDUCTING OCEANIC CRUST FROM U-TH DISEQUILIBRIA IN AUSTRAL ANDEAN LAVAS | NATURE 394 [1998] 566-569 | doi: 10.1038/29052
[5372] STERN C. R., KILIAN R.: ROLE OF THE SUBDUCTED SLAB, MANTLE WEDGE AND CONTINENTAL CRUST IN THE GENERATION OF ADAKITES FROM THE ANDEAN AUSTRAL VOLCANIC ZONE | CONTRIB. MINERAL. PETROL. 123 [1996] 263-281 | doi: 10.1007/s004100050155
[5575] POLAT A., KERRICH R.: ARCHEAN GREENSTONE BELT MAGMATISM AND THE CONTINENTAL GROWTH-MANTLE EVOLUTION CONNECTION: CONSTRAINTS FROM TH-U-NB-LREE SYSTEMATICS OF THE 2.7 GA WAWA SUBPROVINCE, SUPERIOR PROVINCE, CANADA | EARTH PLANET. SCI. LETT. 175 [2000] 41-54 | doi: 10.1016/S0012-821X(99)00283-6
[5582] POLAT A., KERRICH R.: MAGNESIAN ANDESITES, NB-ENRICHED BASALT-ANDESITES, AND ADAKITES FROM LATE-ARCHEAN 2.7 GA WAWA GREENSTONE BELT, SUPERIOR PROVINCE, CANADA: IMPLICATIONS FOR LATE ARCHEAN SUBDUCTION ZONE PETROGENETIC PROCESSES | CONTRIB. MINERAL. PETROL. 141 [2001] 36-52 | doi: 10.1007/s004100000223
[5584] POLAT A., KERRICH R.: ND-ISOTOPE SYSTEMATICS OF ~2.7 GA ADAKITES, MAGNESIAN ANDESITES, AND ARC BASALTS, SUPERIOR PROVINCE: EVIDENCE FOR SHALLOW CRUSTAL RECYCLING AT ARCHEAN SUBDUCTION ZONES | EARTH PLANET. SCI. LETT. 202 [2002] 345-360 | doi: 10.1016/S0012-821X(02)00806-3
[5736] TOMASCAK P. B., RYAN J. G., DEFANT M. J.: LITHIUM ISOTOPE EVIDENCE FOR LIGHT ELEMENT DECOUPLING IN THE PANAMA SUBARC MANTLE | GEOLOGY 28 [2000] 507-510 | doi: 10.1130/0091-7613(2000)28<507:LIEFLE>2.0.CO;2
[6954] PUCHTEL I. S., HOFMANN A. W., AMELIN YU. V., GARBE-SCHÖNBERG D., SAMSONOV A. V., SHCHIPANSKY A. A.: COMBINED MANTLE PLUME-ISLAND ARC MODEL FOR THE FORMATION OF THE 2.9 GA SUMOZERO-KENOZERO GREENSTONE BELT, SE BALTIC SHIELD: ISOTOPE AND TRACE ELEMENT CONSTRAINTS | GEOCHIM. COSMOCHIM. ACTA 63 [1999] 3579-3595 | doi: 10.1016/S0016-7037(99)00111-8
[7189] POLAT A., MÜNKER C.: HF-ND ISOTOPE EVIDENCE FOR CONTEMPORANEOUS SUBDUCTION PROCESSES IN THE SOURCE OF LATE ARCHEAN ARC LAVAS FROM THE SUPERIOR PROVINCE, CANADA | CHEM. GEOL. 213 [2004] 403-429 | doi: 10.1016/j.chemgeo.2004.08.016
[7862] BINDEMAN I. N., EILER J. M., YOGODZINSKI G. M., TATSUMI Y., STERN C. R., GROVE T. L., PORTNYAGIN M. V., HOERNLE K. A., DANYUSHEVSKY L. V.: OXYGEN ISOTOPE EVIDENCE FOR SLAB MELTING IN MODERN AND ANCIENT SUBDUCTION ZONES | EARTH PLANET. SCI. LETT. 235 [2005] 480-496 | doi: 10.1016/j.epsl.2005.04.014
[7987] KAY S. M., RAMOS V. A., MARQUEZ M.: EVIDENCE IN CERRO PAMPA VOLCANIC ROCKS FOR SLAB-MELTING PRIOR TO RIDGE-TRENCH COLLISION IN SOUTHERN SOUTH AMERICA | J. GEOL. 101 [1993] 703-714 | doi: 10.1086/648269
[7993] REAY A., PARKINSON D. L.: ADAKITES FROM SOLANDER ISLAND, NEW ZEALAND | NEW ZEALAND J. GEOL. GEOPHYS. 40 [1997] 121-126 | doi: 10.1080/00288306.1997.9514746
[9091] GUO FENG, FAN WEI-MING, LI CHAOWEN: GEOCHEMISTRY OF LATE MESOZOIC ADAKITES FROM THE SULU BELT, EASTERN CHINA: MAGMA GENESIS AND IMPLICATIONS FOR CRUSTAL RECYCLING BENEATH COLLISIONAL OROGENS | GEOL. MAG. 143 [2006] 1-13 | doi: 10.1017/S0016756805001214
[9146] MACPHERSON C. G., DREHER S. T., THIRLWALL M. F.: ADAKITES WITHOUT SLAB MELTING: HIGH PRESSURE DIFFERENTIATION OF ISLAND ARC MAGMA, MINDANAO, THE PHILIPPINES | EARTH PLANET. SCI. LETT. 243 [2006] 581-593 | doi: 10.1016/j.epsl.2005.12.034
[9441] NAQVI S. M., KHAN R. M. K., MANIKYAMBA C., RAM MOHAN M., KHANNA T. C.: GEOCHEMISTRY OF THE NEO-ARCHAEAN HIGH-MG BASALTS, BONINITES AND ADAKITES FROM THE KUSHTAGI-HUNGUND GREENSTONE BELT OF THE EASTERN DHARWAR CRATON (EDC); IMPLICATIONS FOR THE TECTONIC SETTING | J. ASIAN EARTH SCI. 27 [2006] 25-44 | GeoReM-id: 1538 | doi: 10.1016/j.jseaes.2005.01.006
[9836] WANG QIAN, WYMAN D. A., ZHAO ZHEN-HUA, XU JI-FENG, BAI ZHENGHUA, XIONG XIAO-LIN, DAI T.-M., LI CHAO-FENG, CHU ZHUYIN: PETROGENESIS OF CARBONIFEROUS ADAKITES AND NB-ENRICHED ARC BASALTS IN THE ALATAW AREA, NORTHERN TIANSHAN RANGE (WESTERN CHINA): IMPLICATIONS FOR PHANEROZOIC CRUSTAL GROWTH IN THE CENTRAL ASIA OROGENIC BELT | CHEM. GEOL. 236 [2007] 42-64 | GeoReM-id: 2847 | doi: 10.1016/j.ch…
[9839] NIU HE-CAI, SATO H., ZHANG HAIXIANG, ITO J., YU XUE-YUAN, NAGAO TAKASHI, TERADA K., ZHANG QI: JUXTAPOSITION OF ADAKITE, BONINITE, HIGH-TIO2 AND LOW-TIO2 BASALTS IN THE DEVONIAN SOUTHERN ALTAY, XINJIANG, NW CHINA | J. ASIAN EARTH SCI. 28 [2006] 439-456 | doi: 10.1016/j.jseaes.2005.11.010
[9960] PALLARES C., MAURY R. C., BELLON H., ROYER J.-Y., CALMUS T., AGUILLON-ROBLES A., COTTEN J., BENOIT M., MICHAUD F., BOURGOIS J.: SLAB-TEARING FOLLOWING RIDGE-TRENCH COLLISION: EVIDENCE FROM MIOCENE VOLCANISM IN BAJA CALIFORNIA, MÉXICO | J. VOLCANOL. GEOTHERM. RES. 161 [2007] 95-117 | doi: 10.1016/j.jvolgeores.2006.11.002
[10270] UJIKE O., GOODWIN A. M., SHIBATA T.: GEOCHEMISTRY AND ORIGIN OF ARCHEAN VOLCANIC ROCKS FROM THE UPPER KEEWATIN ASSEMBLAGE (CA. 2.7 GA), LAKE OF THE WOODS GREENSTONE BELT, WESTERN WABIGOON SUBPROVINCE, SUPERIOR PROVINCE, CANADA | THE ISLAND ARC 16 [2007] 191-208 | doi: 10.1111/j.1440-1738.2007.00566.x
[10364] GUO ZHENGFU, WILSON M., LIU JIAQI: POST-COLLISIONAL ADAKITES IN SOUTH TIBET: PRODUCTS OF PARTIAL MELTING OF SUBDUCTION-MODIFIED LOWER CRUST | LITHOS 96 [2007] 205-224 | GeoReM-id: 3066 | doi: 10.1016/j.lithos.2006.09.011
[10558] NAQVI S. M., RANA PRATHAP J. G.: GEOCHEMISTRY OF ADAKITES FROM NEOARCHAEAN ACTIVE CONTINENTAL MARGIN OF SHIMOGA SCHIST BELT, WESTERN DHARWAR CRATON, INDIA: IMPLICATIONS FOR THE GENESIS OF TTG | PREC. RESEARCH 156 [2007] 32-54 | doi: 10.1016/j.precamres.2007.03.003
[10660] CASTILLO P. R., RIGBY S. J., SOLIDUM R. U.: ORIGIN OF HIGH FIELD STRENGTH ELEMENT ENRICHMENT IN VOLCANIC ARCS: GEOCHEMICAL EVIDENCE FROM THE SULU ARC, SOUTHERN PHILIPPINES | LITHOS 97 [2007] 271-288 | GeoReM-id: 3059 | doi: 10.1016/j.lithos.2006.12.012
[10965] PROUTEAU G., MAURY R. C., RANGIN C., SUPARKA E., BELLON H., PUBELLIER M., COTTEN J.: MIOCENE ADAKITES FROM NORTHWEST BORNEO AND THEIR RELATION TO THE SUBDUCTION OF THE PROTO SOUTH CHINA SEA | COMPT. REND. ACAD. SCI. PARIS SER. 2A 323 [1996] 925-932
[11115] AGUILLON-ROBLES A., CALMUS T., BENOIT M., BELLON H., MAURY R. C., COTTEN J., BOURGOIS J., MICHAUD F.: LATE MIOCENE ADAKITES AND NB-ENRICHED BASALTS FROM VIZCAINO PENINSULA, MEXICO: INDICATORS OF EAST PACIFIC RISE SUBDUCTION BELOW SOUTHERN CALIFORNIA? | GEOLOGY 29 [2001] 531-534 | doi: 10.1130/0091-7613(2001)029<0531:LMAANE>2.0.CO;2
[11116] BENOIT M., AGUILLON-ROBLES A., CALMUS T., MAURY R. C., BELLON H., COTTEN J., BOURGOIS J., MICHAUD F.: GEOCHEMICAL DIVERSITY OF LATE MIOCENE VOLCANISM IN SOUTHERN BAJA CALIFORNIA, MEXICO: IMPLICATIONS OF MANTLE AND CRUSTAL SOURCES DURING THE OPENING OF AN ASTHENOSPHERIC WINDOW | J. GEOL. 110 [2002] 627-648 | doi: 10.1086/342735
[11617] WANG QIAN, WYMAN D. A., XU JI-FENG, WAN YUSHENG, LI CHAO-FENG, ZI FENG, JIANG ZIQI, CHU ZHUYIN, ZHAO ZHEN-HUA, DONG YANHUI: TRIASSIC NB-ENRICHED BASALTS, MAGNESIAN ANDESITES, AND ADAKITES OF THE QIANGTANG TERRANE (CENTRAL TIBET): EVIDENCE FOR METASOMATISM BY SLAB-DERIVED MELTS IN THE MANTLE WEDGE | CONTRIB. MINERAL. PETROL. 155 [2008] 473-490 | GeoReM-id: 4326 | doi: 10.1007/s00410-007-02…
[11653] FALLOON T. J., DANYUSHEVSKY L. V., CRAWFORD A. J., MEFFRE S. J., WOODHEAD J. D., BLOOMER S. H.: BONINITES AND ADAKITES FROM THE NORTHERN TERMINATION OF THE TONGA TRENCH: IMPLICATIONS FOR ADAKITE PETROGENESIS | J. PETROL. 49 [2008] 697-715 | doi: 10.1093/petrology/egm080
[11752] ISHIWATARI A., YANAGIDA Y., LI YI-BING, ISHII T., HARAGUCHI S., KOIZUMI K., ICHIYAMA Y., UMEKA M.: DREDGE PETROLOGY OF THE BONINITE- AND ADAKITE-BEARING HAHAJIMA SEAMOUNT OF THE OGASAWARA (BONIN) FOREARC: AN OPHIOLITE OR A SERPENTINITE SEAMOUNT? | THE ISLAND ARC 15 [2006] 102-118 | doi: 10.1111/j.1440-1738.2006.00512.x
[11774] MOTOKI A., ORIHASHI Y., NARANJO J. A., HIRATA D., SKVARCA P., ANMA R.: GEOLOGIC RECONNAISSANCE OF LAUTARO VOLCANO, CHILEAN PATAGONIA | REV. GEOL. CHILE 33 [2006] 177-187 | doi: 10.4067/S0716-02082006000100008
[11870] ZHAO ZHEN-HUA, XIONG XIAO-LIN, WANG QIAN, WYMAN D. A., BAO ZHIWEI, BAI ZHENGHUA, QIAO Y. L.: UNDERPLATING-RELATED ADAKITES IN XINJIANG, TIANSHAN, CHINA | LITHOS 102 [2008] 374-391 | GeoReM-id: 4173 | doi: 10.1016/j.lithos.2007.06.008
[11924] CHUNG SUN-LIN, LIU DUNYI, JI JIANQING, CHU MEI-FEI, LEE HAO-YANG, WEN DA-JEN, LO CHING-HUA, LEE TUNG-YI, QIAN QING, ZHANG QI: ADAKITES FROM CONTINENTAL COLLISION ZONES: MELTING OF THICKENED LOWER CRUST BENEATH SOUTHERN TIBET | GEOLOGY 31 [2003] 1021-1024 | doi: 10.1130/G19796.1
[11926] GAO SHAN, RUDNICK R. L., YUAN HONG-LING, LIU XIAO-MING, LIU YONG-SHENG, XU WEN-LIANG, LING WEN-LI, AYERS J., WANG XUAN-CE, WANG QING-HAI: RECYCLING LOWER CONTINENTAL CRUST IN THE NORTH CHINA CRATON | NATURE 432 [2004] 892-897 | GeoReM-id: 841 | doi: 10.1038/nature03162
[11935] XIONG XIAO-LIN, ZHAO ZHEN-HUA, BAI ZHENGHUA, MEI HOUJUN, XU JI-FENG, WANG QIANG: ORIGIN OF AWULALE ADAKITIC SODIUM-RICH ROCKS IN WESTERN TIANSHAN: CONSTRAINTS FOR ND AND SR ISOTOPIC COMPOSITIONS | ACTA PETROL. SINICA (YANSHI-XUEBAO) 17 [2001] 514-522
[11959] ZHANG HAIXIANG, NIU HE-CAI, SATO H., YU XUE-YUAN, SHAN QIANG, ZHANG BOYOU, ITO J., NAGAO TAKASHI: LATE PALEOZOIC ADAKITES AND NB-ENRICHED BASALTS FROM NORTHERN XINJIANG, NORTHWEST CHINA: EVIDENCE FOR THE SOUTHWARD SUBDUCTION OF THE PALEO-ASIAN OCEANIC PLATE | THE ISLAND ARC 14 [2005] 55-68 | doi: 10.1111/j.1440-1738.2004.00457.x
[11974] LI CHAOWEN, GUO FENG, FAN WEI-MING, GAO XIAOFENG: AR-AR GEOCHRONOLOGY OF LATE MESOZOIC VOLCANIC ROCKS FROM THE YANJI AREA, NE CHINA AND TECTONIC IMPLICATIONS | SCI. CHINA SER. D EARTH SCI. 50 [2007] 505-518 | doi: 10.1007/s11430-007-2046-9
[12042] GAO XIAOFENG, GUO FENG, FAN WEI-MING, LI CHAOWEN, LI XIAOYONG: ORIGIN OF LATE MESOZOIC INTERMEDIATE-FELSIC VOLCANIC ROCKS FROM THE NORTHERN DA HINGGAN MOUNTAINS, NE CHINA | ACTA PETROL. SINICA (YANSHI-XUEBAO) 21 [2005] 737-748
[12084] DANYUSHEVSKY L. V., FALLOON T. J., CRAWFORD A. J., TETROEVA S. A., LESLIE R. L., VERBEETEN A. C.: HIGH-MG ADAKITES FROM KADAVU ISLAND GROUP, FIJI, SOUTHWEST PACIFIC: EVIDENCE FOR THE MANTLE ORIGIN OF ADAKITE PARENTAL MELTS | GEOLOGY 36 [2008] 499-502 | doi: 10.1130/G24349A.1
[12247] WANG QIANG, WYMAN D. A., XU JI-FENG, DONG YANHUI, VASCONCELOS P. M. P., PEARSON N. J., WAN YUSHENG, DONG HAN, LI CHAO-FENG, YU YUANSHAN, ZHU TONGXING, FENG XINTAO, ZHANG QIYUE, ZI FENG, CHU ZHUYIN: EOCENE MELTING OF SUBDUCTING CONTINENTAL CRUST AND EARLY UPLIFTING OF CENTRAL TIBET: EVIDENCE FROM CENTRAL-WESTERN QIANGTANG HIGH-K CALC-ALKALINE ANDESITES, DACITES AND RHYOLITES | EARTH PLANET…
[12271] NAQVI S. M., SARMA D. S., SAWKAR R. H., MOHAN M. R., PRATHAP J. G. RANA: ROLE OF ADAKITIC MAGMATISM AND SUBDUCTION IN GOLD ENVIRONMENT OF DHARWAR NEOARCHAEAN GREENSTONE BELTS, INDIA | J. GEOL. SOC. INDIA 71 [2008] 875-888
[12593] PALLARES C., BELLON H., BENOIT M., MAURY R. C., AGUILLON-ROBLES A., CALMUS T., COTTEN J.: TEMPORAL GEOCHEMICAL EVOLUTION OF NEOGENE VOLCANISM IN NORTHERN BAJA CALIFORNIA (27°-30° N): INSIGHTS ON THE ORIGIN OF POST-SUBDUCTION MAGNESIAN ANDESITES | LITHOS 105 [2008] 162-180 | doi: 10.1016/j.lithos.2008.03.004
[12642] MANIKYAMBA C., KERRICH R., KHANNA T. C., KRISHNA A. K., SATYANARAYANAN M.: GEOCHEMICAL SYSTEMATICS OF KOMATIITE-THOLEIITE AND ADAKITIC-ARC BASALT ASSOCIATIONS: THE ROLE OF A MANTLE PLUME AND CONVERGENT MARGIN IN FORMATION OF THE SANDUR SUPERTERRANE, DHARWAR CRATON, INDIA | LITHOS 106 [2008] 155-172 | GeoReM-id: 4211 | doi: 10.1016/j.lithos.2008.07.003
[12813] AITCHISON J. C., ALI J. R., CHAN ANGEL, DAVIS AILEEN. M., LO CHING-HUA: TECTONIC IMPLICATIONS OF FELSIC TUFFS WITHIN THE LOWER MIOCENE GANGRINBOCHE CONGLOMERATES, SOUTHERN TIBET | J. ASIAN EARTH SCI. 34 [2008] 287-297 | doi: 10.1016/j.jseaes.2008.05.008
[13224] MANIKYAMBA C., KERRICH R., KHANNA T. C., SATYANARAYANAN M., KRISHNA A. K.: ENRICHED AND DEPLETED ARC BASALTS, WITH MG-ANDESITES AND ADAKITES: A POTENTIAL PAIRED ARC-BACK-ARC OF THE 2.6 GA HUTTI GREENSTONE TERRANE, INDIA | GEOCHIM. COSMOCHIM. ACTA 73 [2009] 1711-1736 | doi: 10.1016/j.gca.2008.12.020
[13427] WYMAN D. A., KERRICH R., POLAT A.: ASSEMBLY OF ARCHEAN CRATONIC MANTLE LITHOSPHERE AND CRUST: PLUME-ARC INTERACTION IN THE ABITIBI-WAWA SUBDUCTION-ACCRETION COMPLEX | PREC. RESEARCH 115 [2002] 37-62 | doi: 10.1016/S0301-9268(02)00005-0
[13546] SVETOV S. A., HUHMA H., SVETOVA A. I., NAZAROVA T. N.: THE OLDEST ADAKITES OF THE FENNOSCANDIAN SHIELD | DOKL. EARTH SCI. 397A [2004] 878-882
[13550] MANIKYAMBA C., KERRICH R., KHANNA T. C., SUBBA RAO D. V.: GEOCHEMISTRY OF ADAKITES AND RHYOLITES FROM THE NEOARCHAEAN GADWAL GREENSTONE BELT, EASTERN DHARWAR CRATON, INDIA: IMPLICATIONS FOR SOURCES AND GEODYNAMIC SETTING | CAN. J. EARTH SCI. 44 [2007] 1517-1535 | doi: 10.1139/E07-034
[13668] YAMAMOTO T., HOANG N.: SYNCHRONOUS JAPAN SEA OPENING MIOCENE FORE-ARC VOLCANISM IN THE ABUKUMA MOUNTAINS, NE JAPAN: AN ADVANCING HOT ASTHENOSPHERE FLOW VERSUS PACIFIC SLAB MELTING | LITHOS 112 [2009] 575-590 | doi: 10.1016/j.lithos.2009.03.044
[13816] BREITSPRECHER K., THORKELSON D. J., GROOME W. G., DOSTAL J.: GEOCHEMICAL CONFORMATION OF THE KULA-FARALLON SLAB WINDOW BENEATH THE PACIFIC NORTHWEST IN EOCENE TIMES | GEOLOGY 31 [2003] 351-354 | doi: 10.1130/0091-7613(2003)031<0351:GCOTKF>2.0.CO;2
[14501] BONINI J. A., BALDWIN S. L.: MESOZOIC METAMORPHIC AND MIDDLE TO LATE TERTIARY MAGMATIC EVENTS ON MAGDALENA AND SANTA MARGARITA ISLANDS, BAJA CALIFORNIA SUR, MEXICO: IMPLICATIONS FOR THE TECTONIC EVOLUTION OF THE BAJA CALIFORNIA CONTINENTAL BORDERLAND | BULL. GEOL. SOC. AM. 110 [1998] 1094-1104 | doi: 10.1130/0016-7606(1998)110<1094:MMAMTL>2.3.CO;2
[14883] GAO YONGFENG, HOU ZENGQIAN, WEI RUIHUA, ZHAO RONGSHENG: POST-COLLISIONAL ADAKITIC PORPHYRIES IN TIBET: GEOCHEMICAL AND SR-ND-PB ISOTOPIC CONSTRAINTS ON PARTIAL MELTING OF OCEANIC LITHOSPHERE AND CRUST-MANTLE INTERACTION | ACTA GEOL. SINICA (DIZHI-XUEBAO) 77 [2003] 194-203 | doi: 10.1111/j.1755-6724.2003.tb00562.x
[14915] GAZEL E., HOERNLE K. A., CARR M. J., HERZBERG C. T., SAGINOR I., VAN DEN BOGAARD P., HAUFF F., FEIGENSON M. D., SWISHER C. C.; III: PLUME-SUBDUCTION INTERACTION IN SOUTHERN CENTRAL AMERICA: MANTLE UPWELLING AND SLAB MELTING | LITHOS 121 [2011] 117-134 | doi: 10.1016/j.lithos.2010.10.008
[14930] GUO FENG, FAN WEI-MING, GAO XIAOFENG, LI CHAOWEN, MIAO LAICHENG, ZHAO LIANG, LI HONGXIA: SR-ND-PB ISOTOPE MAPPING OF MESOZOIC IGNEOUS ROCKS IN NE CHINA: CONSTRAINTS ON TECTONIC FRAMEWORK AND PHANEROZOIC CRUSTAL GROWTH | LITHOS 120 [2010] 563-578 | GeoReM-id: 5335 | doi: 10.1016/j.lithos.2010.09.020
[15010] TOKUNAGA S., NAKAI S., ORIHASHI Y.: TWO TYPES OF ADAKITES REVEALED BY 238U-230TH DISEQUILIBRIUM FROM DAISEN VOLCANO, SOUTHWESTERN JAPAN | GEOCHEM. J. 44 [2010] 379-386 | doi: 10.2343/geochemj.1.0080
[15050] KANG ZHI-QIANG, XU JI-FENG, CHEN JIAN-LIN, WANG BAO-DI: GEOCHEMISTRY AND ORIGIN OF CRETACEOUS ADAKITES IN MAMUXIA FORMATION, SANGRI GROUP, SOUTH TIBET | GEOCHIMICA (DIQIU-HUAXUE) 38 [2009] 334-344
[15338] PE-PIPER G., CHRISTOFIDES G., ELEFTHERIADES/ELEFTHERIADIS G.: LEAD AND NEODYMIUM ISOTOPIC COMPOSITION OF TERTIARY IGNEOUS ROCKS OF NORTHERN GREECE AND THEIR REGIONAL SIGNIFICANCE | ACTA VULCANOL. 10 [1998] 255-263
[15552] CHASHCHIN A. A., NECHAEV V. P., NECHAEVA E. V., BLOKHIN M. G.: DISCOVERY OF EOCENE ADAKITES IN PRIMOR^E | DOKL. EARTH SCI. 438 [2011] 744-749 | doi: 10.1134/S1028334X1106016X
[15743] HIDALGO P. J., VOGEL T. A., ROONEY T. O., CURRIER R. M., LAYER P. W.: ORIGIN OF SILICIC VOLCANISM IN THE PANAMANIAN ARC: EVIDENCE FOR A TWO-STAGE FRACTIONATION PROCESS AT EL VALLE VOLCANO | CONTRIB. MINERAL. PETROL. 162 [2011] 1115-1138 | doi: 10.1007/s00410-011-0643-2
[15752] DREHER S. T., MACPHERSON C. G., PEARSON D. G., DAVIDSON J. P.: RE-OS ISOTOPE STUDIES OF MINDANAO ADAKITES: IMPLICATIONS FOR SOURCES OF METALS AND MELTS | GEOLOGY 33 [2005] 957-960 | doi: 10.1130/G21755.1
[15962] WANG YANG, CHENG SUHUA: FIELD RELATION, GEOCHEMISTRY AND ORIGIN OF THE XINGLONGGOU VOLCANIC ROCKS IN BEIPIAO AREA, LIAONING PROVINCE (CHINA): REAPPRAISAL ON THE FOUNDERING OF LOWER CONTINENTAL CRUST OF NORTH CHINA CRATON | J. ASIAN EARTH SCI. 47 [2012] 35-50 | doi: 10.1016/j.jseaes.2011.12.008
[16285] MAO QIOGUI, XIAO WENJIAO, FANG TONGHUI, WANG JINGBIN, HAN CHUNMING, SUN MIN, YUAN CHAO: LATE ORDOVICIAN TO EARLY DEVONIAN ADAKITES AND NB-ENRICHED BASALTS IN THE LIUYUAN AREA, BEISHAN, NW CHINA: IMPLICATIONS FOR EARLY PALEOZOIC SLAB-MELTING AND CRUSTAL GROWTH IN THE SOUTHERN ALTAIDS | GONDWANA RES. 22 [2012] 534-553 | doi: 10.1016/j.gr.2011.06.006
[16629] ZHANG YONGBEI, SUN SHIHUA, MAO QIAN: MESOZOIC O-TYPE ADAKITIC VOLCANIC ROCKS AND ITS PETROGENESIS, PALEO-TECTONIC DYNAMIC AND MINERALIZATION SIGNIFICANCE OF THE EASTERN SIDE OF SOUTHERN DA HINGGAN, CHINA | ACTA PETROL. SINICA (YANSHI-XUEBAO) 22 [2006] 2289-2304
[17183] FOLEY F. V., PEARSON N. J., RUSHMER T., TURNER SIMON P., ADAM J.: MAGMATIC EVOLUTION AND MAGMA MIXING OF QUATERNARY ADAKITES AT SOLANDER AND LITTLE SOLANDER ISLANDS, NEW ZEALAND | J. PETROL. 54 [2013] 703-744 | GeoReM-id: 7461 | doi: 10.1093/petrology/egs082
[17304] NAKAMURA H., IWAMORI H.: GENERATION OF ADAKITES IN A COLD SUBDUCTION ZONE DUE TO DOUBLE SUBDUCTING PLATES | CONTRIB. MINERAL. PETROL. 165 [2013] 1107-1134 | doi: 10.1007/s00410-013-0850-0
[18111] LIU XIUJIN, LIU WI: SOURCE CHARACTERISTICS AND TECTONIC SETTING OF THE EARLY AND MIDDLE DEVONIAN VOLCANIC ROCKS IN THE NORTH JUNGGAR, NORTHWEST CHINA: INSIGHTS FROM ND-SR ISOTOPES AND GEOCHEMISTRY | LITHOS 184-187 [2014] 27-41 | GeoReM-id: 7963 | doi: 10.1016/j.lithos.2013.10.015
[18193] KHANNA T. C., BIZIMIS M., YOGODZINSKI G. M., MALLICK S.: HAFNIUM-NEODYMIUM ISOTOPE SYSTEMATICS OF THE 2.7 GA GADWAL GREENSTONE TERRANE, EASTERN DHARWAR CRATON, INDIA: IMPLICATIONS FOR THE EVOLUTION OF THE ARCHEAN DEPLETED MANTLE | GEOCHIM. COSMOCHIM. ACTA 127 [2014] 10-24 | GeoReM-id: 8143 | doi: 10.1016/J.GCA.2013.11.024
[18473] KIMURA J.-I., GILL J. B., KUNIKIYO T., OSAKA I., SHIMOSHIOIRI Y., KATAKUSE M., KAKUBUCHI S., NAGAO TAKASHI, FURUYAMA K., KAMEI A., KAWABATA H., NAKAJIMA J., VAN KEKEN P. E., STERN R. J.: DIVERSE MAGMATIC EFFECTS OF SUBDUCTING A HOT SLAB IN SW JAPAN: RESULTS FROM FORWARD MODELING | GEOCHEMISTRY GEOPHYSICS GEOSYSTEMS 15 [2014] 691-739 | GeoReM-id: 8127 | doi: 10.1002/2013GC005132
[18727] HIDALGO P. J., ROONEY T. O.: PETROGENESIS OF A VOLUMINOUS QUATERNARY ADAKITIC VOLCANO: THE CASE OF BARU VOLCANO | CONTRIB. MINERAL. PETROL. 168 (1011) [2014] | doi: 10.1007/S00410-014-1011-9
[19258] KHANNA T. C., SAI V. V. S., BIZIMIS M., KRISHNA A. K.: PETROGENESIS OF BASALT-HIGH-MG ANDESITE-ADAKITE IN THE NEOARCHEAN VELIGALLU GREENSTONE TERRANE: GEOCHEMICAL EVIDENCE FOR A RIFTED BACK-ARC CRUST IN THE EASTERN DHARWAR CRATON, INDIA | PREC. RESEARCH 25 [2015] 260-277 | GeoReM-id: 8776 | doi: 10.1016/j.precamres.2015.01.004
[19488] GONZALEZ-PARTIDA E., LEVRESSE G., CARRILLO-CHAVEZ A., CHEILLETZ A., GASQUET D., JONES D.: PALEOCENE ADAKITE AU-FE BEARING ROCKS, MEZCALA, MEXICO: EVIDENCE FROM GEOCHEMICAL CHARACTERISTICS | J. GEOCHEM. EXPLORATION 80 [2003] 25-40 | doi: 10.1016/S0375-6742(03)00180-8
[19747] IMAOKA T., KIMINAMI K., NISHIDA K., TAKEMOTO M., IKAWA T., ITAYA T., KAGAMI H., IIZUMI S.: K-AR AGE AND GEOCHEMISTRY OF THE SW JAPAN PALEOGENE CAULDRON CLUSTER: IMPLICATIONS FOR EOCENE-OLIGOCENE THERMO-TECTONIC REACTIVATION | J. ASIAN EARTH SCI. 40 [2011] 509-533 | doi: 10.1016/j.jseaes.2010.10.002
[20666] KHANNA T. C., SAI V. V. S., BIZIMIS M., KRISHNA A. K.: PETROGENESIS OF ULTRAMAFICS IN THE NEOARCHEAN VELIGALLU GREENSTONE TERRANE, EASTERN DHARWAR CRATON, INDIA: CONSTRAINTS FROM BULK-ROCK GEOCHEMISTRY AND LU-HF ISOTOPES | PREC. RESEARCH 285 [2016] 186-201 | GeoReM-id: 9616 | doi: 10.1016/j.precamres.2016.09.020
[22090] LI XI-YAO, LI SANZHONG, SUO YAN-HUI, SOMERVILLE I. D., HUANG FENG, LIU XIN, WANG PENG-CHENG, HAN ZHI-XIN, JIN LI-JIE: EARLY CRETACEOUS DIABASES, LAMPROPHYRES AND ANDESITES-DACITES IN WESTERN SHANDONG, NORTH CHINA CRATON: IMPLICATIONS FOR LOCAL DELAMINATION AND PALEO-PACIFIC SLAB ROLLBACK | J. ASIAN EARTH SCI. 160 [2018] 426-444 | doi: 10.1016/j.jseaes.2017.08.005
[23270] AZIZI H., STERN R. J., TOPUZ G., ASAHARA Y., MOGHADAM H. S.: LATE PALEOCENE ADAKITIC GRANITOID FROM NW IRAN AND COMPARISON WITH ADAKITES IN THE NE TURKEY: ADAKITIC MELT GENERATION IN NORMAL CONTINENTAL CRUST | LITHOS 346-347 (105151) [2019] | doi: 10.1016/j.lithos.2019.105151
[23304] HASTIE A. R., FITTON J. G., MITCHELL S. F., NEILL I., NOWELL G. M., MILLAR I. L.: CAN FRACTIONAL CRYSTALLIZATION, MIXING AND ASSIMILATION PROCESSES BE RESPONSIBLE FOR JAMAICAN-TYPE ADAKITES? IMPLICATIONS FOR GENERATING EOARCHAEAN CONTINENTAL CRUST | J. PETROL. 56 [2015] 1251-1284 | doi: 10.1093/petrology/egv029
[23500] YANG LIMING, SU LI, SONG SHUGUANG, ALLEN M. B., BI HENGZHE, FENG DI, LI WUFU, LI YAN-GUANG: INTERACTION BETWEEN OCEANIC SLAB AND METASOMATIZED MANTLE WEDGE: CONSTRAINTS FROM SODIC LAVAS FROM THE QILIAN OROGEN, NW CHINA | LITHOS 348-349 (105182) [2019] | GeoReM-id: 12137 | doi: 10.1016/j.lithos.2019.105182
[23535] YAMAMOTO T., HOANG N.: GEOCHEMICAL VARIATIONS OF THE QUATERNARY DAISEN ADAKITES, SOUTHWEST JAPAN, CONTROLLED BY MAGMA PRODUCTION RATE | LITHOS 350-351 (105214) [2019] | GeoReM-id: 12135 | doi: 10.1016/j.lithos.2019.105214
[25453] JI CHEN, YAN LI-LONG, LU LU, JIN XIN, HUANG QIANG-TAI, ZHANG KAI-JUN: ANDUO LATE CRETACEOUS HIGH-K CALC-ALKALINE AND SHOSHONITIC VOLCANIC ROCKS IN CENTRAL TIBET, WESTERN CHINA: RELAMINATION OF THE SUBDUCTED MESO-TETHYAN OCEANIC PLATEAU | LITHOS 400-401 (106345) [2021] | doi: 10.1016/j.lithos.2021.106345
[25594] KHANNA T. C., SAI V. V. S., BIZIMIS M., KRISHNA A. K.: PETROGENESIS OF BASALT-HIGH-MG ANDESITE-ADAKITE IN THE NEOARCHEAN VELIGALLU GREENSTONE TERRANE: GEOCHEMICAL EVIDENCE FOR A RIFTED BACK-ARC CRUST IN THE EASTERN DHARWAR CRATON, INDIA | PREC. RESEARCH 258 [2015] 260-277 | doi: 10.1016/j.precamres.2015.01.004
Criteria:
QUERY - BY - PETROGRAPHY: - - - - ROCK - NAME: - ... - ADAKITE... - - - SAMPLE - CRITERIA - (COMBINED - WITH - AND): - - - ROCK - NAME: - ADAKITE - - - ROCK - TYPE: - VOLCANIC - ROCK - - - TYPE - OF - MATERIAL: - VOLCANIC - GLASS - / - WHOLE - ROCK -
[truncated: 6 more columns]

## Sheet: G51637
Gao, Y., et al., 2023, Garnet versus amphibole: Implications for magmatic differentiation and slab melting: Geology, https://doi.org/10.1130/G51637.1
